# Supplementary material
Source: PubMed Central journal article supplement (PMC3712825)

## Supporting Information

# MCR Synthesis and Biological Evaluation of Novel Praziquantel Derivatives

Haixia Liu, Samia William, Eberhardt Herdtweck, Sanaa Botros, and Alexander Dömling\*

*School of Pharmacy and Department of Chemistry, University of Pittsburgh, 3501 Fifth Avenue, BST3 10019, Pittsburgh, PA  
15261*

*AND*

*Drug Design, University of Groningen, A. Deusinglaan 1, 9713 AV Groningen, Netherlands*

## List of Content

|    |                                                                   |    |
|----|-------------------------------------------------------------------|----|
| 1. | Chemistry: Procedures and analytical data                         | 2  |
| 2. | Selected NOE studies of the Pictet-Spengler reaction cycloadducts | 11 |
| 3. | Proposed mechanism for the Pictet-Spengler cycloaddition          | 12 |
| 4. | X-ray Structure Information of <b>9e</b>                          | 13 |
| 5. | Biological Screening                                              | 16 |
| 6. | Copies of <sup>1</sup> H NMR and <sup>13</sup> C NMR              | 17 |

## 1 CHEMISTRY

### Experimental Section

**General procedure (I) for the Ugi reaction:** A mixture of aldehyde (1.2 eq.), amine (1.0 mmol) and carboxylic acid (1.0 eq.) in anhydrous MeOH was treated with isocyanide (1.0 eq.) at 0 °C. After being stirred at room temperature overnight, the reaction mixture was concentrated in vacuo to give Ugi-4CR product, which was used directly in the next step without further purification.

**General procedure (II) for the Pictet-Spengler reaction:** A mixture of above Ugi product (1.0 eq.) and anhydrous MgSO<sub>4</sub> (2.0 eq.) in anhydrous 1,2-dichloroethane was treated with MsOH (6.0 eq.) slowly under argon at room temperature. The mixture was then kept at 80 °C with stirring until the reaction was complete by TLC. After completion, the reaction was quenched by cold aq. NaHCO<sub>3</sub> solution and extracted with ethyl acetate. The combined organic layers were dried over Na<sub>2</sub>SO<sub>4</sub> and concentrated under reduced pressure. The crude residue was purified by flash column chromatography.

**2-(Cyclohexanecarbonyl)-10-methoxy-2,3,6,7-tetrahydro-1H-pyrazino [2,1-a]isoquinolin-4(11bH)-one (8a):**

According to general procedure II was obtained as a white solid. <sup>1</sup>H NMR (600 MHz, CDCl<sub>3</sub>): δ = 1.27 (m, 3H), 1.52 (m, 2H), 1.81 (m, 5H), 2.47 (tt, *J* = 3.0, 11.4 Hz, 1H), 2.71 (d, *J* = 14.4 Hz, 1H), 2.85 (m, 3H), 3.79 (s, 3H), 4.07 (d, *J* = 17.4 Hz, 1H), 4.46 (d, *J* = 17.4 Hz, 1H), 4.75 (1dd, *J* = 4.3, 10.8 Hz, 1H), 4.80 (dd, *J* = 4.2, 12.0 Hz, 1H), 5.14 (dd, *J* = 3.0, 16.8 Hz, 1H), 6.79 (s, 1H), 6.80 (dd, *J* = 1.8, 8.4 Hz, 1H), 7.08 (d, *J* = 8.4 Hz, 1H) ppm. <sup>13</sup>C NMR (150 MHz, CDCl<sub>3</sub>): δ = 174.82, 164.36, 158.51, 133.69, 130.26, 126.67, 114.08, 110.05, 55.43, 55.08, 49.02, 45.18, 40.79, 39.36, 29.24, 29.01, 27.90, 25.70 ppm. HRMS (EI) calcd for C<sub>20</sub>H<sub>26</sub>N<sub>2</sub>O<sub>3</sub> [M]<sup>+</sup>: 342.1943, found: 342.1943.

**2-(Cyclohexanecarbonyl)-9,10-dimethoxy-2,3,6,7-tetrahydro-1H-pyrazino[2,1-a]isoquinolin-4(11bH)-one**

**(8b):** According to general procedure II was obtained as a white solid. <sup>1</sup>H NMR (600 MHz, CDCl<sub>3</sub>): δ = 1.28 (3H, m), 1.55 (2H, m), 1.76 (5H, m), 2.47 (1H, tt, *J* = 3.0, 12.0 Hz), 2.68 (1H, d, *J* = 15.0 Hz), 2.78 (1H, dd, *J* = 11.2, 13.8 Hz), 2.84 (1H, ddd, *J* = 2.4, 12.6, 12.6 Hz), 2.92 (1H, ddd, *J* = 4.2, 15.6, 15.6 Hz), 3.86 (3H, s), 3.87 (3H, s), 4.08 (1H, d, *J* = 17.4 Hz), 4.87 (1H, d, *J* = 17.4 Hz), 4.72 (1H, dd, *J* = 3.6, 10.2 Hz), 4.85 (1H, m), 5.12 (1H, dd, *J* = 3.0, 13.2 Hz), 6.64 (1H, s), 6.72 (1H, s) ppm. <sup>13</sup>C NMR (150 MHz, CDCl<sub>3</sub>): δ = 174.86, 164.33,

148.26, 148.06, 126.89, 124.38, 111.62, 108.00, 56.09, 55.92, 54.80, 49.00, 45.35, 40.77, 39.12, 29.24, 29.01, 28.26, 25.70, 25.68, 25.66 ppm. HRMS (ESI) calcd for  $C_{21}H_{28}N_2O_4Na$   $[M+Na]^+$ : 395.1947, found: 395.1947.

**Compound 8c:** According to general procedure II was obtained as a white solid.  $^1H$  NMR (600 MHz,  $CDCl_3$ ):  $\delta$  = 1.27 (m, 3H), 1.54 (m, 2H), 1.80 (m, 5H), 2.45 (tt,  $J$  = 11.4, 3.0 Hz, 1H), 2.71 (dd,  $J$  = 11.4, 13.2 Hz, 1H), 2.94 (m, 3H), 4.05 (d,  $J$  = 17.4 Hz, 1H), 4.48 (d,  $J$  = 17.4 Hz, 1H), 4.70 (d,  $J$  = 9.6 Hz, 1H), 5.03 (dd,  $J$  = 4.8, 13.2 Hz, 1H), 5.14 (dd,  $J$  = 2.4, 13.8 Hz, 1H), 6.89 (d,  $J$  = 4.8 Hz, 1H), 7.19 (d,  $J$  = 4.8 Hz, 1H) ppm.  $^{13}C$  NMR (150 MHz,  $CDCl_3$ ):  $\delta$  = 174.69, 164.40, 135.07, 131.81, 124.46, 123.71, 54.44, 49.10, 44.20, 40.62, 39.32, 29.55, 28.97, 25.69, 25.66, 24.66 ppm. HRMS (EI) calcd for  $C_{17}H_{12}N_2O_2S$   $[M]^+$ : 318.1402, found: 318.1399.

**Methyl 2-(cyclohexanecarbonyl)-4-oxo-2,3,4,6,7,11b-hexahydro-1H-pyrazino[2,1-a]isoquinoline-6-carboxylate (8d):** According to general procedure II was obtained as a wax.  $^1H$  NMR (600 MHz,  $CDCl_3$ ):  $\delta$  = 1.28 (m, 3H), 1.54 (m, 2H), 1.58-1.87 (m, 5H), 2.49 (t,  $J$  = 11.4 Hz, 1H), 2.97 (ddd,  $J$  = 3.0, 12.0, 12.0 Hz, 1H), 3.17 (dd,  $J$  = 6.0, 15.6 Hz, 1H), 3.28 (m, 1H), 3.63 (s, 3H), 4.20 (d,  $J$  = 17.4 Hz, 1H), 4.51 (d,  $J$  = 17.4 Hz, 1H), 4.96 (m, 2H), 5.63 (dd,  $J$  = 3.6, 5.4 Hz, 1H), 7.18-7.28 (m, 4H) ppm.  $^{13}C$  NMR (150 MHz,  $CDCl_3$ ):  $\delta$  = 174.92, 170.48, 165.41, 131.71, 131.56, 129.13, 127.82, 127.48, 125.68, 53.39, 52.67, 50.28, 48.77, 45.73, 40.87, 30.51, 29.12, 28.97, 25.71 ppm. HRMS (ESI) calcd for  $C_{21}H_{26}N_2O_4Na$   $[M+Na]^+$ : 393.1790, found: 393.1801.

**2-(Cyclohexanecarbonyl)-3-methyl-2,3,6,7-tetrahydro-1H-pyrazino [2,1-a]isoquinolin-4(11bH)-one (9a):** According to general procedure II was obtained as a wax.  $^1H$  NMR (600 MHz,  $CDCl_3$ ):  $\delta$  = 1.25-1.79 (m, 13H), 2.36 (m, 1H), 2.81-3.13 (m, 3H), 3.51 (m, 0.4H), 3.79 (m, 0.6H), 4.00 (m, 0.4H), 4.27 (m, 0.6H), 4.48 (m, 0.6H), 4.58 (m, 0.6H), 4.77 (m, 1H), 4.82 (m, 0.4H), 4.94 (m, 0.4H), 7.17-7.30 (m, 4H) ppm.  $^{13}C$  NMR (150 MHz,  $CDCl_3$ ):  $\delta$  = 175.36, 168.54, 135.19, 133.66, 128.87, 127.77, 126.92, 125.01, 54.44, 53.98, 41.83, 40.73, 40.43, 29.92, 29.04, 28.22, 25.61, 19.92 ppm. HRMS (ESI) calcd for  $C_{20}H_{26}N_2O_2Na$   $[M+Na]^+$ : 349.1892, found: 349.1876.

**2-(Cyclohexanecarbonyl)-3-cyclopropyl-2,3,6,7-tetrahydro-1H-pyrazino[2,1-a]isoquinolin-4(11bH)-one (9b):** According to general procedure II was obtained a wax.  $^1H$  NMR (600 MHz,  $CDCl_3$ ):  $\delta$  = 0.67 (m, 4H), 1.25-1.82 (m, 11H), 2.42 (m, 1H), 2.82 (dd,  $J$  = 3.0, 12.0 Hz, 1H), 2.93-3.08 (m, 2H), 3.50 (dd,  $J$  = 8.4, 8.4 Hz, 0.5H), 3.93 (d,  $J$  = 12.6 Hz, 0.5H), 3.99 (d,  $J$  = 8.4 Hz, 0.5H), 4.04 (dd,  $J$  = 9.6, 24.0 Hz, 0.5H), 4.17 (d,  $J$  = 4.8 Hz, 0.5H), 4.60 (d,  $J$  = 12.0 Hz, 0.5H), 4.65 (d,  $J$  = 6.0 Hz, 0.5H), 4.80 (m, 0.5H), 4.95 (m, 0.5H), 5.12 (m, 0.5H), 7.18-7.31

(m, 4H) ppm.  $^{13}\text{C}$  NMR (150 MHz,  $\text{CDCl}_3$ ):  $\delta$  = 175.82, 167.30, 135.08, 133.19, 128.87, 127.62, 126.88, 125.21, 61.08, 53.30, 44.87, 40.60, 39.74, 29.80, 29.26, 28.41, 25.85, 14.80, 4.46, 3.34 ppm. HRMS (EI) calcd for  $\text{C}_{22}\text{H}_{28}\text{N}_2\text{O}_2$   $[\text{M}]^+$ : 352.2151, found: 352.2148.

**2-(Cyclohexanecarbonyl)-3-isopropyl-2,3,6,7-tetrahydro-1H-pyrazino[2,1-a]isoquinolin-4(11bH)-one (9c):**

According to general procedure II was obtained as a white solid.  $^1\text{H}$  NMR (600 MHz,  $\text{CDCl}_3$ ):  $\delta$  = 1.03 (d,  $J$  = 6.6 Hz, 1.5H), 1.07 (d,  $J$  = 6.6 Hz, 1.5H), 1.12 (d,  $J$  = 6.6 Hz, 1.5H), 1.17 (d,  $J$  = 6.6 Hz, 1.5H), 1.24 (m, 4H), 1.49-1.47 (m, 2H), 1.67-1.80 (m, 5H), 2.10 (m, 0.5H), 2.24 (m, 0.5H), 2.78-3.06 (m, 3H), 3.50 (dd,  $J$  = 10.8, 10.8 Hz, 0.5H), 3.72 (dd,  $J$  = 5.4, 14.4 Hz, 0.5H), 3.98 (dd,  $J$  = 4.2, 11.4 Hz, 0.5H), 4.10 (d,  $J$  = 9.0 Hz, 0.5H), 4.16 (dd,  $J$  = 8.4, 13.8 Hz, 0.5H), 4.63 (m, 0.5H), 4.81 (dd,  $J$  = 3.0, 13.2 Hz, 0.5H), 4.85 (d,  $J$  = 9.6 Hz, 0.5H), 4.89 (dd,  $J$  = 4.8, 9.8 Hz, 0.5H), 5.02 (dd,  $J$  = 3.6, 9.6 Hz, 0.5H), 7.16 (m, 1H), 7.23 (m, 2H), 7.29 (m, 1H) ppm.  $^{13}\text{C}$  NMR (150 MHz,  $\text{CDCl}_3$ ):  $\delta$  = 176.13, 175.71, 168.68, 167.93, 135.81, 135.00, 134.44, 132.49, 129.51, 128.92, 127.76, 127.56, 126.93, 126.83, 125.98, 125.42, 64.62, 61.00, 53.24, 53.01, 50.21, 44.72, 41.12, 40.70, 39.83, 38.62, 32.19, 31.63, 29.99, 29.92, 29.71, 29.06, 28.50, 28.42, 26.00, 25.69, 25.62, 25.47, 20.21, 20.05 ppm. HRMS (ESI) calcd for  $\text{C}_{22}\text{H}_{30}\text{N}_2\text{O}_2\text{Na}$   $[\text{M}+\text{Na}]^+$ : 377.2205, found: 377.2217.

**(3R,11bS)-2-(Cyclohexanecarbonyl)-3-isobutyl-2,3,6,7-tetrahydro-1H-pyrazino[2,1-a]isoquinolin-4(11bH)-one (9d):**

According to general procedure II was obtained as a white solid.  $^1\text{H}$  NMR (600 MHz,  $\text{CDCl}_3$ ):  $\delta$  = 0.96 (d,  $J$  = 6.0 Hz, 1.5H), 0.99 (d,  $J$  = 6.0 Hz, 1.5H), 1.07 (d,  $J$  = 6.0 Hz, 3H), 1.22 (m, 2H), 1.72 (m, 10.5H), 1.92 (m, 0.5H), 2.39 (tt,  $J$  = 3.0, 11.4 Hz, 1H), 2.80 (m, 1H), 2.98 (m, 2H), 3.57 (dd,  $J$  = 9.6, 12.0 Hz, 0.5H), 3.78 (dd,  $J$  = 4.2, 13.8 Hz, 0.5H), 3.97 (dd,  $J$  = 3.6, 12.0 Hz, 0.5H), 4.13 (dd,  $J$  = 7.2, 13.8 Hz, 0.5H), 4.43 (dd,  $J$  = 7.8, 7.8 Hz, 0.5H), 4.62 (m, 0.5H), 4.82 (m, 1H), 4.98 (dd,  $J$  = 3.6, 9.0 Hz, 0.5H), 5.04 (dd,  $J$  = 7.2, 7.2 Hz, 0.5H), 7.14 (d,  $J$  = 6.6 Hz, 0.5H), 7.23 (m, 2H), 7.29 (m, 1.5H) ppm.  $^{13}\text{C}$  NMR (150 MHz,  $\text{CDCl}_3$ ):  $\delta$  = 175.45, 174.98, 169.18, 168.09, 135.96, 135.15, 133.39, 132.44, 129.56, 128.86, 127.77, 127.61, 126.90, 126.81, 125.90, 125.44, 57.24, 54.68, 53.79, 53.61, 49.28, 43.43, 43.40, 42.22, 41.04, 40.63, 40.09, 38.97, 29.97, 29.70, 29.60, 29.04, 28.97, 28.82, 28.60, 28.40, 25.95, 25.92, 25.68, 25.60, 25.02, 24.64, 23.12, 22.42, 22.21, 22.09 ppm. HRMS (ESI) calcd for  $\text{C}_{23}\text{H}_{32}\text{N}_2\text{O}_2\text{Na}$   $[\text{M}+\text{Na}]^+$ : 391.2361, found: 391.2352.

**2-(Cyclohexanecarbonyl)-3-neopentyl-2,3,6,7-tetrahydro-1H-pyrazino[2,1-a]isoquinolin-4(11bH)-one (9e):**

According to general procedure II was obtained as a white solid.  $^1\text{H}$  NMR (600 MHz,  $\text{CDCl}_3$ ):  $\delta$  = 1.03 (s, 5.4H), 1.07 (s, 3.6H), 1.25 (m, 4H), 1.44 (m, 1H), 1.74 (m, 6.6H), 1.99 (dd,  $J$  = 8.4, 14.4 Hz, 0.4H), 2.35 (tt,  $J$  = 3.0, 11.4 Hz, 0.6H), 2.48 (tt,  $J$  = 3.0, 11.4 Hz, 0.4H), 2.78 (dd,  $J$  = 15.6, 15.6 Hz, 1H), 2.86 (ddd,  $J$  = 3.0, 12.0, 12.0 Hz,

0.8H), 2.98 (m, 1.2H), 3.74 (dd,  $J = 8.4, 12.6$  Hz, 0.6H), 3.84 (dd,  $J = 4.8, 13.8$  Hz, 0.4H), 3.90 (dd,  $J = 8.4, 13.8$  Hz, 0.4H), 4.01 (dd,  $J = 4.8, 12.6$  Hz, 0.6H), 4.57 (dd,  $J = 5.4, 8.4$  Hz, 0.4H), 4.67 (m, 0.4H), 4.81 (ddd,  $J = 2.4, 4.8, 13.2$  Hz, 0.6H), 4.98 (dd,  $J = 4.8, 8.4$  Hz, 0.4H), 5.03 (dd,  $J = 4.8, 7.8$  Hz, 0.6H), 5.28 (dd,  $J = 6.6, 6.6$  Hz, 0.6H), 7.26 (m, 4H) ppm.  $^{13}\text{C}$  NMR (150 MHz,  $\text{CDCl}_3$ ):  $\delta = 174.61, 170.20, 136.60, 132.73, 129.66, 127.75, 126.80, 125.80, 53.75, 53.50, 48.14, 46.30, 40.89, 39.37, 30.94, 29.70, 29.52, 29.06, 28.56, 25.95, 25.66, 25.56$  ppm. HRMS (ESI) calcd for  $\text{C}_{24}\text{H}_{34}\text{N}_2\text{O}_2\text{Na}$   $[\text{M}+\text{Na}]^+$ : 405.2518, found: 405.2530.

**2-(Cyclohexanecarbonyl)-3-(4-fluorophenyl)-2,3,6,7-tetrahydro-1H-pyrazino[2,1-a]isoquinolin-4(11bH)-one (9f)**: According to general procedure II was obtained as a white solid.  $^1\text{H}$  NMR (600 MHz,  $\text{CDCl}_3$ ):  $\delta = 0.89\text{-}1.27$  (m, 4H), 1.44-1.88 (m, 6H), 2.26 (m, 1H), 2.83 (m, 1H), 2.95 (m, 2H), 3.52 (dd,  $J = 12.0, 12.0$  Hz, 1H), 4.15 (d,  $J = 12.0$  Hz, 1H), 4.62 (m, 2H), 5.67 (s, 1H), 7.06-7.18 (m, 3H), 7.24 (m, 3H), 7.36-7.47 (m, 2H) ppm.  $^{13}\text{C}$  NMR (150 MHz,  $\text{CDCl}_3$ ):  $\delta = 176.61, 166.78, 162.23, 134.85, 131.95, 128.96, 127.91, 127.24, 127.18, 127.03, 126.20, 116.25, 61.72, 51.87, 49.03, 41.16, 38.95, 29.94, 29.71, 29.06, 28.73, 25.75, 25.34$  ppm. HRMS (ESI) calcd for  $\text{C}_{25}\text{H}_{27}\text{N}_2\text{O}_2\text{FNa}$   $[\text{M}+\text{Na}]^+$ : 429.1954, found: 429.1953.

**2-(Cyclohexanecarbonyl)-3-(hydroxymethyl)-2,3,6,7-tetrahydro-1H-pyrazino[2,1-a]isoquinolin-4(11bH)-one (9g)**: According to general procedure II was obtained as a wax.  $^1\text{H}$  NMR (600 MHz,  $\text{CDCl}_3$ ):  $\delta = 1.10$  (m, 3H), 1.20 (m, 2H), 1.51 (m, 1H), 1.58 (m, 2H), 1.69 (m, 2H), 2.02 (br s, 1H), 2.12 (tt,  $J = 3.6, 10.8$  Hz, 1H), 2.69 (ddd,  $J = 3.0, 3.0, 16.2$  Hz, 1H), 2.81 (ddd,  $J = 3.6, 12.0, 12.0$  Hz, 1H), 2.91 (ddd,  $J = 4.8, 11.4, 16.2$  Hz, 1H), 3.15 (dd,  $J = 8.4, 13.2$  Hz, 1H), 3.45 (dd,  $J = 4.8, 13.2$  Hz, 1H), 3.76 (dd,  $J = 3.0, 7.8$  Hz, 1H), 4.20 (dd,  $J = 3.0, 10.8$  Hz, 1H), 4.43 (dd,  $J = 7.2, 11.4$  Hz, 1H), 4.72 (dd,  $J = 4.8, 8.4$  Hz, 1H), 4.78 (ddd,  $J = 2.4, 5.4, 13.2$  Hz, 1H), 7.08 (m, 1H), 7.09 (m, 1H), 7.16 (m, 2H) ppm.  $^{13}\text{C}$  NMR (150 MHz,  $\text{CDCl}_3$ ):  $\delta = 175.66, 166.77, 135.09, 134.28, 129.38, 127.16, 126.66, 124.52, 64.54, 57.21, 57.01, 45.54, 43.04, 39.72, 28.89, 28.85, 25.63, 25.38, 25.34$  ppm. HRMS (ESI) calcd for  $\text{C}_{20}\text{H}_{26}\text{N}_2\text{O}_3\text{Na}$   $[\text{M}+\text{Na}]^+$ : 365.1841, found: 365.1834.

**2-(Cyclopropanecarbonyl)-2,3,6,7-tetrahydro-1H-pyrazino[2,1-a] isoquinolin-4(11bH)-one (10a)**: According to general procedure II was obtained as a white solid.  $^1\text{H}$  NMR (600 MHz,  $\text{CDCl}_3$ ):  $\delta = 0.88$  (m, 2H), 1.01 (m, 1H), 1.11 (m, 1H), 1.71 (m, 1H), 2.92 (m, 4H), 4.21 (d,  $J = 17.4$  Hz, 1H), 4.70 (d,  $J = 17.4$  Hz, 1H), 4.83 (d,  $J = 4.8$  Hz, 2H), 5.13 (d,  $J = 17.4$  Hz, 1H), 7.18 (d,  $J = 7.2$  Hz, 1H), 7.26 (m, 3H) ppm.  $^{13}\text{C}$  NMR (150 MHz,  $\text{CDCl}_3$ ):  $\delta = 172.34, 164.46, 134.81, 132.65, 129.30, 127.45, 126.97, 125.58, 54.87, 48.95, 45.58, 39.01, 28.75, 11.22, 8.39, 8.08$  ppm. HRMS (EI) calcd for  $\text{C}_{16}\text{H}_{18}\text{N}_2\text{O}_2$   $[\text{M}]^+$ : 270.1368, found: 270.1367.

**2-Benzoyl-2,3,6,7-tetrahydro-1H-pyrazino[2,1-a]isoquinolin-4(11bH)-one (10b):** According to general procedure II was obtained a white solid.  $^1\text{H}$  NMR (600 MHz,  $\text{CDCl}_3$ ):  $\delta$  = 2.81 (dd,  $J$  = 2.4, 16.2 Hz, 1H), 2.91 (ddd,  $J$  = 3.0, 12.0, 12.0 Hz, 1H), 3.00 (ddd,  $J$  = 4.2, 15.6, 15.6 Hz, 1H), 3.08 (m, 1H), 4.10 (m, 1H), 4.37 (m, 1H), 4.82 (m, 1H), 5.00 (m, 1H), 5.28 (m, 1H), 7.22-7.60 (m, 9H) ppm.  $^{13}\text{C}$  NMR (150 MHz,  $\text{CDCl}_3$ ):  $\delta$  = 170.33, 164.22, 134.83, 134.18, 132.73, 130.74, 129.45, 128.76, 127.56, 126.99, 125.50, 54.69, 51.45, 45.95, 39.04, 28.75 ppm. HRMS (EI) calcd for  $\text{C}_{19}\text{H}_{18}\text{N}_2\text{O}_2$   $[\text{M}]^+$ : 306.1368, found: 306.1363.

**2-(2,4-Dimethylbenzoyl)-2,3,6,7-tetrahydro-1H-pyrazino[2,1-a] isoquinolin-4(11bH)-one (10c):** According to general procedure II was obtained as a white solid.  $^1\text{H}$  NMR (600 MHz,  $\text{CDCl}_3$ ):  $\delta$  = 2.27 (s, 3H), 2.31 (s, 3H), 2.78-3.08 (m, 4H), 3.92 (d,  $J$  = 18.0 Hz, 1H), 4.10 (d,  $J$  = 18.0 Hz, 1H), 4.82 (d,  $J$  = 10.8 Hz, 1H), 4.97 (dd,  $J$  = 4.2, 10.2 Hz, 1H), 5.32 (d,  $J$  = 11.4 Hz, 1H), 7.05-7.40 (m, 7H) ppm.  $^{13}\text{C}$  NMR (150 MHz,  $\text{CDCl}_3$ ):  $\delta$  = 170.38, 164.30, 139.70, 134.78, 132.72, 131.95, 131.48, 129.39, 127.56, 127.03, 126.86, 126.08, 125.51, 125.06, 55.13, 50.27, 45.09, 39.19, 28.73, 21.25, 18.95 ppm. HRMS (ESI) calcd for  $\text{C}_{21}\text{H}_{22}\text{N}_2\text{O}_2\text{Na}$   $[\text{M}+\text{Na}]^+$ : 357.1579, found: 357.1549.

**2-(4-Fluoro-3-nitrobenzoyl)-2,3,6,7-tetrahydro-1H-pyrazino[2,1-a] isoquinolin-4(11bH)-one (10d):** According to general procedure II was obtained as a white solid.  $^1\text{H}$  NMR (600 MHz,  $\text{CDCl}_3$ ):  $\delta$  = 2.82 (dd,  $J$  = 2.4, 15.6 Hz, 1H), 2.93 (ddd,  $J$  = 3.0, 12.6, 12.6 Hz, 1H), 3.01 (ddd,  $J$  = 4.2, 12.0, 12.0 Hz, 1H), 3.13 (m, 1H), 4.23 (m, 2H), 4.83 (m, 1H), 5.01 (d,  $J$  = 7.2 Hz, 1H), 5.20 (m, 1H), 7.22 (m, 2H), 7.29 (m, 2H), 7.44 (dd,  $J$  = 9.0, 9.0 Hz, 1H), 7.83 (m, 1H), 8.28 (dd,  $J$  = 2.4, 7.2 Hz, 1H) ppm.  $^{13}\text{C}$  NMR (150 MHz,  $\text{CDCl}_3$ ):  $\delta$  = 166.72, 161.10, 156.07, 137.27, 134.83, 132.20, 131.09, 129.57, 128.75, 127.79, 127.12, 126.04, 125.35, 119.29, 54.49, 51.28, 46.37, 39.16, 28.68 ppm. HRMS (EI) calcd for  $\text{C}_{19}\text{H}_{16}\text{N}_3\text{O}_4\text{F}$   $[\text{M}]^+$ : 369.1125, found: 369.1136.

**2-(4-Methoxyquinoline-2-carbonyl)-2,3,6,7-tetrahydro-1H-pyrazino [2,1-a]isoquinolin-4(11bH)-one (10e):** According to general procedure II was obtained as a white solid.  $^1\text{H}$  NMR (600 MHz,  $\text{CDCl}_3$ ):  $\delta$  = 2.82 (m, 1H), 2.94 (m, 1H), 3.04 (m, 1H), 3.14 (dd,  $J$  = 10.8, 13.2 Hz, 0.5H), 3.25 (dd,  $J$  = 10.8, 13.2 Hz, 0.5H), 4.03 (d,  $J$  = 18.0 Hz, 0.5H), 4.12 (s, 1.5H), 4.20 (s, 1.5H), 4.43 (d,  $J$  = 18.0 Hz, 0.5H), 4.83 (ddd,  $J$  = 2.4, 4.8, 12.6 Hz, 0.5H), 4.99 (m, 0.5H), 5.00 (d,  $J$  = 17.4 Hz, 0.5H), 5.06 (dd,  $J$  = 4.2, 10.8 Hz, 0.5H), 5.13 (d,  $J$  = 18.0 Hz, 0.5H), 5.32 (m, 1H), 5.52 (dd,  $J$  = 3.6, 11.2 Hz, 0.5H), 7.09 (d,  $J$  = 7.8 Hz, 0.5H), 7.17 (m, 0.5H), 7.21 (m, 1H), 7.25 (s, 0.5H), 7.30-7.35 (m, 2H), 7.41 (d,  $J$  = 7.8 Hz, 0.5H), 7.60 (dd,  $J$  = 7.2, 7.2 Hz, 0.5H), 7.63 (dd,  $J$  = 7.2, 7.2 Hz, 0.5H), 7.76 (dd,  $J$  = 7.8, 7.8 Hz, 0.5H), 7.80 (dd,  $J$  = 7.8, 7.8 Hz, 0.5H), 8.06 (dd,  $J$  = 8.4 Hz, 1H), 8.23 (d,  $J$  = 8.4 Hz, 0.5H), 8.29 (dd,  $J$  = 8.4 Hz, 0.5H) ppm.  $^{13}\text{C}$  NMR (150 MHz,  $\text{CDCl}_3$ ):  $\delta$  = 167.67, 166.80, 164.87, 164.84, 163.51, 163.46,

153.50, 153.18, 147.43, 147.34, 135.15, 134.92, 132.79, 132.71, 130.69, 130.56, 129.54, 129.41, 129.36, 129.14, 127.54, 127.32, 127.17, 127.14, 127.04, 126.85, 125.63, 125.33, 122.10, 121.82, 121.70, 121.46, 100.81, 100.22, 56.15, 56.13, 56.09, 54.64, 51.17, 51.08, 47.64, 46.51, 38.99, 38.81, 28.95, 28.77 ppm. HRMS (EI) calcd for C<sub>23</sub>H<sub>21</sub>N<sub>3</sub>O<sub>3</sub> [M]<sup>+</sup>: 387.1583, found: 387.1585.

**2-(1-Ethyl-7-methyl-4-oxo-1,4-dihydro-1,8-naphthyridine-3-carbonyl)-2,3,6,7-tetrahydro-1H-pyrazino[2,1-a]isoquinolin-4(11bH)-one (10f):** According to general procedure II was obtained as a white wax. <sup>1</sup>H NMR (600 MHz, CDCl<sub>3</sub>): δ = 1.52 (m, 3H), 2.70 (s, 1.65H), 2.72 (s, 1.35H), 2.79 (m, 1H), 2.91 (m, 1H), 2.98 (m, 1H), 3.13 (m, 1H), 3.99 (d, J = 18.6 Hz, 0.55H), 4.27 (d, J = 12.0 Hz, 0.45H), 4.32 (s, 1H), 4.45 (m, 1H), 4.56 (m, 1H), 4.81 (m, 0.55H), 4.95 (m, 1H), 5.00 (dd, J = 3.0, 10.8 Hz, 0.45H), 5.17 (dd, J = 3.0, 13.2 Hz, 0.55H), 5.50 (d, J = 8.4 Hz, 0.45H), 7.11-7.39 (m, 5H), 8.21(s, 0.55H), 8.29 (s, 0.45H), 8.60 (d, J = 8.4 Hz, 0.55H), 8.70 (d, J = 8.4 Hz, 0.45H) ppm. <sup>13</sup>C NMR (150 MHz, CDCl<sub>3</sub>): δ = 174.16, 173.69, 166.15, 165.65, 165.50, 165.04, 163.13, 163.04, 148.61, 148.60, 146.99, 146.04, 136.54, 136.50, 135.16, 134.88, 132.92, 132.84, 129.30, 129.23, 127.45, 127.12, 126.98, 126.63, 125.83, 125.66, 121.24, 121.12, 120.42, 120.25, 117.75, 117.41, 56.01, 54.68, 53.77, 51.51, 50.78, 47.39, 46.64, 46.53, 38.95, 38.65, 31.76, 29.26, 29.01, 28.79, 25.22 ppm. HRMS (ESI) calcd for C<sub>24</sub>H<sub>24</sub>N<sub>4</sub>O<sub>3</sub>Na [M+Na]<sup>+</sup>: 439.1746, found: 439.1707.

**2-(2-(Pyridin-4-ylthio)acetyl)-2,3,6,7-tetrahydro-1H-pyrazino[2,1-a] isoquinolin-4(11bH)-one (10g):** According to general procedure II was obtained as a yellow wax. <sup>1</sup>H NMR (600 MHz, CDCl<sub>3</sub>): δ = 2.79-2.99 (m, 4H), 3.89 (s, 2H), 4.21 (d, J = 17.4 Hz, 1H), 4.48 (d, J = 17.4 Hz, 1H), 4.83 (m, 2H), 5.06 (ddd, J = 1.8, 4.2, 13.2 Hz, 1H), 7.29 (m, 6H), 8.44 (d, J = 4.2 Hz, 2H) ppm. <sup>13</sup>C NMR (150 MHz, CDCl<sub>3</sub>): δ = 166.09, 163.44, 149.49, 146.99, 134.74, 132.17, 129.39, 127.68, 125.42, 121.09, 54.72, 49.48, 45.69, 39.18, 33.40, 28.64 ppm. HRMS (EI) calcd for C<sub>19</sub>H<sub>19</sub>N<sub>3</sub>O<sub>2</sub>S [M]<sup>+</sup>: 353.1198, found: 353.1203.

**1-(4-Oxo-3,4,6,7-tetrahydro-1H-pyrazino[2,1-a]isoquinolin-2(11bH)-yl) -2-phenylethane-1,2-dione (10h):** According to general procedure II was obtained as a white wax. <sup>1</sup>H NMR (600 MHz, CDCl<sub>3</sub>): δ = 2.80 (ddd, J = 1.5, 18.8, 18.8 Hz, 1H), 2.87-3.01 (m, 2H), 3.18 (dd, J = 11.2, 13.2 Hz, 0.5H), 3.30 (dd, J = 10.8, 13.8 Hz, 0.5H), 4.80 (m, 0.5H), 4.89 (m, 0.5 H), 5.00 (m, 1.5H), 5.14 (dd, J = 4.2, 13.8 Hz, 0.5H), 6.93 (d, J = 7.8 Hz, 0.5H), 7.18 (m, 1H), 7.22 (dd, J = 7.2, 7.2 Hz, 1H), 7.33 (m, 2H), 7.51 (dd, J = 8.4, 8.4 Hz, 1H), 7.55 (dd, J = 7.2, 7.2 Hz, 1H), 7.69 (m, 1H), 7.95 (d, J = 8.4 Hz, 1H), 8.04 (d, J = 7.8 Hz, 1H) ppm. <sup>13</sup>C NMR (150 MHz, CDCl<sub>3</sub>): δ = 190.46, 190.25, 165.12, 164.71, 163.84, 163.22, 135.31, 135.26, 135.08, 134.89, 132.92, 132.60, 132.17, 131.56, 130.02, 129.84, 129.54, 129.51, 129.19, 127.80, 127.70, 127.11, 126.94, 125.42, 125.26, 55.68, 54.92, 49.63,

48.64, 45.49, 44.61, 39.26, 38.89, 28.75, 28.63 ppm. HRMS (EI) calcd for C<sub>20</sub>H<sub>18</sub>N<sub>2</sub>O<sub>3</sub> [M]<sup>+</sup>: 334.1317, found: 334.1321.

**General procedure (III) for the amidation of compound 8d:** To a mixture of **8d** (1.0 eq.) and amine (1.5 eq.) was added TBD (0.2 eq.). The mixture was heated at 60 °C for 2h and the mixture was purified by flash column chromatography directly to give **11(a-b)**.

**2-(Cyclohexanecarbonyl)-N-(2-methoxyethyl)-4-oxo-2,3,4,6,7,11b-hexahydro-1H-pyrazino[2,1-**

**a]isoquinoline-6-carboxamide (11a):** According to general procedure III was obtained as a white solid. <sup>1</sup>H NMR (600 MHz, CDCl<sub>3</sub>): δ = 1.28 (m, 3H), 1.31-1.85 (m, 7H), 2.45 (m, 1H), 3.08 (dd, *J* = 6.0, 15.6 Hz, 1H), 3.26-3.46 (m, 9H), 3.69 (dd, *J* = 7.8, 13.8 Hz, 1H), 4.25 (d, *J* = 18.0 Hz, 1H), 4.40 (d, *J* = 18.0 Hz, 1H), 4.83 (dd, *J* = 3.6, 7.8 Hz, 1H), 5.24 (dd, *J* = 6.0, 6.0 Hz, 1H), 6.50 (br s, 1H), 7.26 (m, 4H) ppm. <sup>13</sup>C NMR (150 MHz, CDCl<sub>3</sub>): δ = 174.82, 169.37, 165.84, 132.95, 132.90, 128.73, 128.01, 127.15, 124.46, 70.93, 58.83, 53.47, 52.03, 48.94, 43.54, 40.83, 39.32, 29.76, 29.07, 28.99, 25.69 ppm. HRMS (EI) calcd for C<sub>23</sub>H<sub>31</sub>N<sub>3</sub>O<sub>4</sub> [M]<sup>+</sup>: 413.2314, found: 413.2306.

**2-(Cyclohexanecarbonyl)-6-(morpholine-4-carbonyl)-2,3,6,7-tetrahydro -1H-pyrazino[2,1-a]isoquinolin-**

**4(11bH)-one (11b):** According to general procedure III was obtained as a white solid. <sup>1</sup>H NMR (600 MHz, CDCl<sub>3</sub>): δ = 1.27 (m, 3H), 1.79 (m, 7H), 2.44 (tt, *J* = 3.0, 11.4 Hz, 1H), 3.10 (m, 2H), 3.69 (m, 9H), 4.18 (d, *J* = 17.4 Hz, 1H), 4.38 (d, *J* = 17.4 Hz, 1H), 4.69 (dd, *J* = 3.6, 13.8 Hz, 1H), 5.04 (dd, *J* = 4.2, 8.4 Hz, 1H), 5.50 (dd, *J* = 6.0, 6.0 Hz, 1H), 7.20 (m, 2H), 7.31 (m, 2H) ppm. <sup>13</sup>C NMR (150 MHz, CDCl<sub>3</sub>): δ = 174.76, 169.20, 165.12, 133.73, 132.13, 128.31, 127.88, 127.39, 124.33, 66.89, 66.70, 53.53, 48.98, 48.77, 46.40, 43.59, 42.57, 40.81, 30.91, 29.07, 25.69 ppm. HRMS (EI) calcd for C<sub>24</sub>H<sub>31</sub>N<sub>3</sub>O<sub>4</sub> [M]<sup>+</sup>: 425.2314, found: 425.2307.

**General procedure (IV) for the amidation of 10c:** To a mixture of **10c** (1.0 eq.) and K<sub>2</sub>CO<sub>3</sub> (1.0 eq.) in DMF was added amine (1.0 eq.). After being stirred at room temperature overnight, the reaction mixture was diluted with H<sub>2</sub>O and extracted with EtOAc. The combined organic layers were dried over Na<sub>2</sub>SO<sub>4</sub> and concentrated under reduced pressure. The residue was purified by flash column chromatography affording **11(c-g)**.

**2-(4-(Cyclopropylmethylamino)-3-nitrobenzoyl)-2,3,6,7-tetrahydro-1H-pyrazino[2,1-a]isoquinolin-4(11bH)-one (11c):** According to general procedure IV was obtained as an orange solid. <sup>1</sup>H NMR (600 MHz, CDCl<sub>3</sub>): δ =



0.36 (m, 2H), 0.68 (m, 2H), 1.21 (m, 1H), 2.79 (ddd,  $J = 2.4, 2.4, 15.6$  Hz, 1H), 2.92 (ddd,  $J = 3.0, 12.6, 12.6$  Hz, 1H), 2.99 (ddd,  $J = 4.8, 12.0, 15.6$  Hz, 1H), 3.11 (m, 1H), 3.22 (m, 2H), 4.17 (m, 1H), 4.54 (m, 1H), 4.83 (d,  $J = 10.8$  Hz, 1H), 5.01 (dd,  $J = 4.8, 10.2$  Hz, 1H), 5.03 (m, 1H), 6.90 (d,  $J = 9.0$  Hz, 1H), 7.19 (d,  $J = 7.2$  Hz, 1H), 7.26 (m, 3H), 7.64 (dd,  $J = 1.2, 8.4$  Hz, 1H), 8.36 (t,  $J = 4.8$  Hz, 1H), 8.42 (d,  $J = 1.8$  Hz, 1H) ppm.  $^{13}\text{C}$  NMR (150 MHz,  $\text{CDCl}_3$ ):  $\delta = 168.57, 164.21, 146.50, 135.69, 134.91, 132.45, 130.64, 129.45, 127.56, 127.35, 127.00, 125.44, 120.28, 114.24, 54.76, 48.21, 38.99, 28.75, 10.24, 3.50$  ppm. HRMS (EI) calcd for  $\text{C}_{23}\text{H}_{24}\text{N}_4\text{O}_4$   $[\text{M}]^+$ : 420.1798, found: 420.1797.

**2-(4-Morpholino-3-nitrobenzoyl)-2,3,6,7-tetrahydro-1H-pyrazino [2,1-a]isoquinolin-4(11bH)-one (11d):**

According to general procedure IV was obtained as an orange solid.  $^1\text{H}$  NMR (600 MHz,  $\text{CDCl}_3$ ):  $\delta = 2.80$  (ddd,  $J = 3.0, 3.0, 15.6$  Hz, 1H), 2.90 (ddd,  $J = 3.0, 12.0, 12.0$  Hz, 1H), 3.00 (ddd,  $J = 4.8, 11.4, 22.8$  Hz, 1H), 3.16 (m, 5H), 3.87 (dd,  $J = 4.8, 4.8$  Hz, 4H), 4.17 (m, 1H), 4.40 (m, 1H), 4.82 (m, 1H), 4.99 (dd,  $J = 4.2, 10.8$  Hz, 1H), 5.15 (m, 1H), 7.15 (d,  $J = 8.4$  Hz, 1H), 7.20 (d,  $J = 7.2$  Hz, 1H), 7.28 (m, 3H), 7.65 (d,  $J = 7.8$  Hz, 1H), 8.01 (d,  $J = 1.8$  Hz, 1H) ppm.  $^{13}\text{C}$  NMR (150 MHz,  $\text{CDCl}_3$ ):  $\delta = 167.93, 163.88, 147.41, 141.06, 134.91, 133.09, 129.50, 127.66, 127.05, 126.64, 126.30, 125.40, 120.17, 66.51, 51.36, 39.06, 28.72$  ppm. HRMS (EI) calcd for  $\text{C}_{23}\text{H}_{24}\text{N}_4\text{O}_5$   $[\text{M}]^+$ : 436.1747, found: 436.1741.

**2-(4-(3-Methoxypropylamino)-3-nitrobenzoyl)-2,3,6,7-tetrahydro-1H-pyrazino[2,1-a]isoquinolin-4(11bH)-one (11e):**

According to general procedure IV was obtained as an orange solid.  $^1\text{H}$  NMR (600 MHz,  $\text{CDCl}_3$ ):  $\delta = 2.02$  (m, 2H), 2.79 (ddd,  $J = 2.4, 2.4, 15.6$  Hz, 1H), 2.90 (ddd,  $J = 3.6, 12.0, 12.0$  Hz, 1H), 2.99 (ddd,  $J = 4.8, 12.0, 15.6$  Hz, 1H), 3.11 (m, 1H), 3.40 (s, 3H), 3.49 (m, 2H), 3.56 (dd,  $J = 6.0, 6.0$  Hz, 2H), 4.18 (m, 1H), 4.55 (m, 1H), 4.82 (d,  $J = 10.8$  Hz, 1H), 5.02 (dd,  $J = 3.0, 10.2$  Hz, 1H), 5.03 (m, 1H), 6.95 (d,  $J = 9.0$  Hz, 1H), 7.19 (d,  $J = 7.2$  Hz, 1H), 7.26 (m, 3H), 7.65 (dd,  $J = 1.2, 9.0$  Hz, 1H), 8.41 (d,  $J = 2.4$  Hz, 1H), 8.60 (t,  $J = 4.2$  Hz, 1H) ppm.  $^{13}\text{C}$  NMR (150 MHz,  $\text{CDCl}_3$ ):  $\delta = 168.65, 164.27, 146.73, 135.67, 134.91, 132.44, 130.73, 129.45, 127.56, 127.40, 127.01, 125.45, 120.11, 114.08, 70.44, 58.88, 54.84, 50.85, 41.23, 39.00, 28.74$  ppm. HRMS (EI) calcd for  $\text{C}_{23}\text{H}_{26}\text{N}_4\text{O}_5$   $[\text{M}]^+$ : 438.1903, found: 438.1911.

**2-(4-(2-Morpholinoethylamino)-3-nitrobenzoyl)-2,3,6,7-tetrahydro-1H-pyrazino[2,1-a]isoquinolin-4(11bH)-one (11f):**

According to general procedure IV was obtained as an orange solid.  $^1\text{H}$  NMR (600 MHz,  $\text{CDCl}_3$ ):  $\delta = 2.55$  (m, 4H), 2.77 (m, 3H), 2.90 (ddd,  $J = 3.0, 12.6, 12.6$  Hz, 1H), 2.99 (ddd,  $J = 3.6, 12.0, 15.6$  Hz, 1H), 3.11 (m, 1H), 3.42 (m, 2H), 3.77 (m, 4H), 4.17 (m, 1H), 4.54 (m, 1H), 4.82 (d,  $J = 11.4$  Hz, 1H), 5.02 (dd,  $J = 3.0, 10.8$  Hz, 1H), 5.03 (m, 1H), 6.89 (d,  $J = 9.0$  Hz, 1H), 7.20 (d,  $J = 10.8$  Hz, 1H), 7.26 (m, 3H), 7.66 (d,  $J = 8.4$  Hz, 1H), 8.42

(d,  $J = 1.8$  Hz, 1H), 8.81 (t,  $J = 4.2$  Hz, 1H) ppm.  $^{13}\text{C}$  NMR (150 MHz,  $\text{CDCl}_3$ ):  $\delta = 168.59, 164.22, 146.36, 135.68, 134.91, 132.44, 130.88, 129.45, 127.56, 127.39, 127.00, 125.43, 120.24, 114.41, 66.99, 55.71, 54.76, 53.10, 39.38, 38.99, 28.71$  ppm. HRMS (EI) calcd for  $\text{C}_{25}\text{H}_{29}\text{N}_5\text{O}_5$   $[\text{M}]^+$ : 479.2169, found: 479.2171.

**5-(Dimethylamino)-N-(2-(2-nitro-4-(4-oxo-2,3,4,6,7,11b-hexahydro-1H-pyrazino[2,1-a]isoquinoline-2-carbonyl)phenylamino)ethyl) naphthalene-1-sulfonamide (11g):** According to general procedure IV was obtained as an orange solid.  $^1\text{H}$  NMR (600 MHz,  $\text{CDCl}_3$ ):  $\delta = 2.81$ (ddd,  $J = 3.0, 3.0, 15.6$  Hz, 1H), 2.88 (s, 6H), 2.92 (ddd,  $J = 3.0, 12.6, 12.6$  Hz, 1H), 3.01 (ddd,  $J = 4.8, 12.0, 15.6$  Hz, 1H), 3.13 (m, 1H), 3.24 (dd,  $J = 6.0, 12.0$  Hz, 2H), 3.44 (dd,  $J = 6.0, 12.0$  Hz, 2H), 4.20 (m, 1H), 4.54 (m, 1H), 4.84 (d,  $J = 11.4$  Hz, 1H), 5.04 (dd,  $J = 4.2, 10.8$  Hz, 1H), 5.71 (t,  $J = 6.0$  Hz, 1H), 6.78 (d,  $J = 8.4$  Hz, 1H), 7.21 (d,  $J = 6.6$  Hz, 1H), 7.24 (d,  $J = 6.6$  Hz, 1H), 7.26 (m, 3H), 7.51 (m, 2H), 7.57 (d,  $J = 8.4$  Hz, 1H), 8.19 (t,  $J = 4.8$  Hz, 1H), 8.26 (m, 2H), 8.32 (d,  $J = 1.2$  Hz, 1H), 8.52 (d,  $J = 8.4$  Hz, 1H) ppm.  $^{13}\text{C}$  NMR (150 MHz,  $\text{CDCl}_3$ ):  $\delta = 168.32, 164.29, 152.09, 146.01, 143.21, 135.63, 134.90, 134.28, 132.44, 131.09, 130.86, 129.87, 129.64, 129.45, 129.40, 128.71, 127.59, 127.37, 127.05, 125.48, 123.13, 120.98, 119.37, 118.34, 115.35, 113.79, 45.40, 42.69, 41.80, 39.05, 28.76$  ppm. HRMS (EI) calcd for  $\text{C}_{33}\text{H}_{34}\text{N}_6\text{O}_6\text{S}$   $[\text{M}]^+$ : 642.2260, found: 642.2238.

## 2 2D NOESY studies of 8e, 9b, 9d, 9f, 9g.

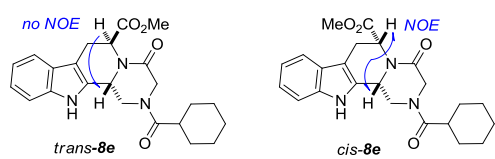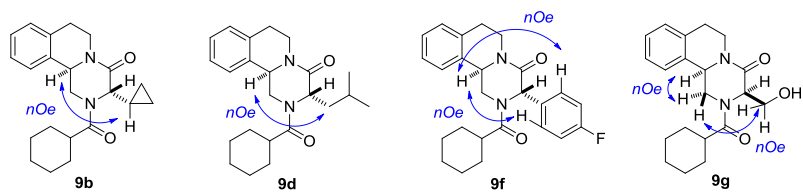

### 3 A plausible mechanism for the Pictet-Spengler cyclization leading to 9d and 9g

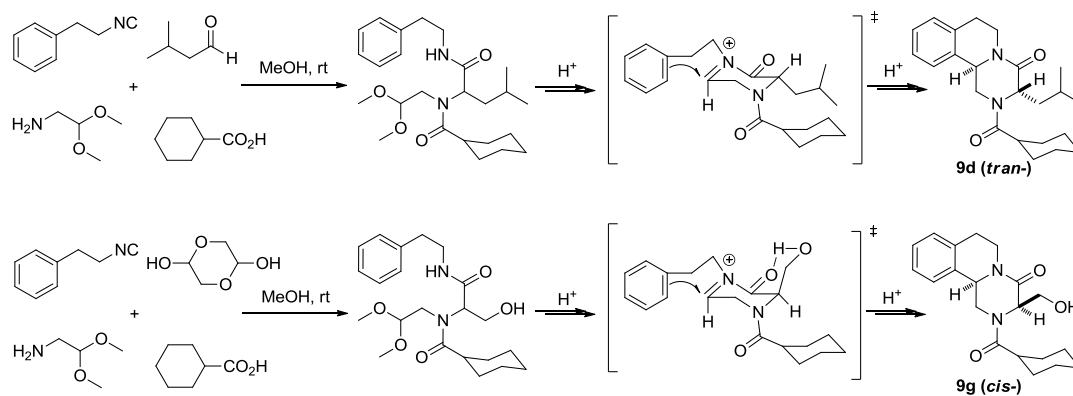

## 4 X-ray data for 9e

### Crystal Structure Determination of 9e

|                                    |                                                                                                                                                                                                                  |                                                             |                           |
|------------------------------------|------------------------------------------------------------------------------------------------------------------------------------------------------------------------------------------------------------------|-------------------------------------------------------------|---------------------------|
| Operator:                          | *** Herdtweck ***                                                                                                                                                                                                |                                                             |                           |
| Molecular Formula:                 | C <sub>24</sub> H <sub>34</sub> N <sub>2</sub> O <sub>2</sub>                                                                                                                                                    |                                                             |                           |
| Crystal Color / Shape              | Colorless needle                                                                                                                                                                                                 |                                                             |                           |
| Crystal Size                       | Approximate size of crystal fragment used for data collection:<br>0.05 × 0.05 × 0.36 mm                                                                                                                          |                                                             |                           |
| Molecular Weight:                  | 382.53 a.m.u.                                                                                                                                                                                                    |                                                             |                           |
| F <sub>000</sub> :                 | 416                                                                                                                                                                                                              |                                                             |                           |
| Systematic Absences:               | none                                                                                                                                                                                                             |                                                             |                           |
| Space Group:                       | Triclinic                                                                                                                                                                                                        | $P\bar{1}$                                                  | (I.T.-No.: 2)             |
| Cell Constants:                    | Least-squares refinement of 9897 reflections with the programs "APEX suite" and "SAINT" [1,2]; theta range 1.30° < $\theta$ < 25.45°; Mo(K $\alpha$ ); $\lambda$ = 71.073 pm                                     |                                                             |                           |
|                                    | $a$ =                                                                                                                                                                                                            | 586.18(2) pm                                                | $\alpha$ = 89.293(3)°     |
|                                    | $b$ =                                                                                                                                                                                                            | 1191.92(5) pm                                               | $\beta$ = 82.239(2)°      |
|                                    | $c$ =                                                                                                                                                                                                            | 1579.91(7) pm                                               | $\gamma$ = 76.332(2)°     |
|                                    | $V$ = 1062.55(8) · 10 <sup>6</sup> pm <sup>3</sup> ; $Z$ = 2; $D_{\text{calc}}$ = 1.196 g cm <sup>-3</sup> ; Mos. = 0.75                                                                                         |                                                             |                           |
| Diffractionmeter:                  | Kappa APEX II (Area Diffraction System; BRUKER AXS); rotating anode; graphite monochromator; 60 kV; 40 mA; $\lambda$ = 71.073 pm; Mo(K $\alpha$ )                                                                |                                                             |                           |
| Temperature:                       | (-120±1) °C; (153±1) K                                                                                                                                                                                           |                                                             |                           |
| Measurement Range:                 | 1.30° < $\theta$ < 25.45°; h: -6/6, k: -14/14, l: -19/19                                                                                                                                                         |                                                             |                           |
| Measurement Time:                  | 2 × 10 s per film                                                                                                                                                                                                |                                                             |                           |
| Measurement Mode:                  | measured: 7 runs; 2821 films / scaled: 7 runs; 2821 films                                                                                                                                                        |                                                             |                           |
|                                    | $\varphi$ - and $\omega$ -movement; Increment: $\Delta\varphi/\Delta\omega$ = 0.50°; dx = 35.0 mm                                                                                                                |                                                             |                           |
| LP - Correction:                   | Yes [2]                                                                                                                                                                                                          |                                                             |                           |
| Intensity Correction               | No/Yes; during scaling [2]                                                                                                                                                                                       |                                                             |                           |
| Absorption Correction:             | Multi-scan; during scaling; $\mu$ = 0.076 mm <sup>-1</sup> [2]                                                                                                                                                   |                                                             |                           |
|                                    | Correction Factors:                                                                                                                                                                                              | $T_{\text{min}}$ = 0.5976                                   | $T_{\text{max}}$ = 0.7452 |
| Reflection Data:                   | 31067                                                                                                                                                                                                            | reflections were integrated and scaled                      |                           |
|                                    | 31067                                                                                                                                                                                                            | reflections to be merged                                    |                           |
|                                    | 3771                                                                                                                                                                                                             | independent reflections                                     |                           |
|                                    | 0.050                                                                                                                                                                                                            | $R_{\text{int}}$ : (basis $F_o^2$ )                         |                           |
|                                    | 3771                                                                                                                                                                                                             | independent reflections (all) were used in refinements      |                           |
|                                    | 3305                                                                                                                                                                                                             | independent reflections with $I_o > 2\sigma(I_o)$           |                           |
|                                    | 95.8 %                                                                                                                                                                                                           | completeness of the data set                                |                           |
|                                    | 389                                                                                                                                                                                                              | parameter full-matrix refinement                            |                           |
|                                    | 9.7                                                                                                                                                                                                              | reflections per parameter                                   |                           |
| Solution:                          | Direct Methods [3]; Difference Fourier syntheses                                                                                                                                                                 |                                                             |                           |
| Refinement Parameters:             | In the asymmetric unit:                                                                                                                                                                                          |                                                             |                           |
|                                    | 28                                                                                                                                                                                                               | Non-hydrogen atoms with anisotropic displacement parameters |                           |
|                                    | 34                                                                                                                                                                                                               | Hydrogen atoms with isotropic displacement parameters       |                           |
| Hydrogen Atoms:                    | All hydrogen atom positions were found in the difference map calculated from the model containing all non-hydrogen atoms. The hydrogen positions were refined with individual isotropic displacement parameters. |                                                             |                           |
| Atomic Form Factors:               | For neutral atoms and anomalous dispersion [4]                                                                                                                                                                   |                                                             |                           |
| Extinction Correction:             | no                                                                                                                                                                                                               |                                                             |                           |
| Weighting Scheme:                  | $w^{-1} = \sigma^2(F_o^2) + (a \cdot P)^2 + b \cdot P$                                                                                                                                                           |                                                             |                           |
|                                    | with a: 0.0318; b: 0.4210; P: [Maximum(0 or $F_o^2$ ) + 2 · $F_c^2$ ]/3                                                                                                                                          |                                                             |                           |
| Shift/Err:                         | Less than 0.001 in the last cycle of refinement:                                                                                                                                                                 |                                                             |                           |
| Resid. Electron Density:           | +0.21 e <sub>0</sub> <sup>-</sup> /Å <sup>3</sup> ; -0.18 e <sub>0</sub> <sup>-</sup> /Å <sup>3</sup>                                                                                                            |                                                             |                           |
| R1:                                | $\sum( F_o  -  F_c ) / \sum F_o $                                                                                                                                                                                |                                                             |                           |
| [ $F_o > 4\sigma(F_o)$ ]; N=3305]: |                                                                                                                                                                                                                  |                                                             | = 0.0349                  |
| [all reflectns; N=3771]:           |                                                                                                                                                                                                                  |                                                             | = 0.0412                  |
| wR2:                               | $[\sum w(F_o^2 - F_c^2)^2 / \sum w(F_o^2)^2]^{1/2}$                                                                                                                                                              |                                                             |                           |
| [ $F_o > 4\sigma(F_o)$ ]; N=3305]: |                                                                                                                                                                                                                  |                                                             | = 0.0837                  |
| [all reflectns; N=3771]:           |                                                                                                                                                                                                                  |                                                             | = 0.0890                  |

Goodness of fit:  $[\sum w(F_o^2 - F_c^2)^2 / (\text{NO-NV})]^{1/2} = 1.038$   
 Remarks: Refinement expression  $\sum w(F_o^2 - F_c^2)^2$   
 Programs: The program system "WinGX32" [7] with the programs: "PLATON" [6], "SHELXL-97" [5], "SIR92" [3]

**Table S1** - Bond Distances (Angstrom) for **9e**

|     |       |             |     |       |             |
|-----|-------|-------------|-----|-------|-------------|
| O5  | -C4   | 1.2313 (15) | C11 | -C12  | 1.389 (2)   |
| O17 | -C16  | 1.2327 (15) | C12 | -C13  | 1.3854 (19) |
| N2  | -C1   | 1.4538 (16) | C13 | -C14  | 1.3967 (17) |
| N2  | -C3   | 1.4660 (15) | C14 | -C15  | 1.5283 (18) |
| N2  | -C16  | 1.3677 (15) | C16 | -C18  | 1.5183 (17) |
| N6  | -C4   | 1.3524 (17) | C18 | -C19  | 1.5325 (18) |
| N6  | -C7   | 1.4635 (17) | C18 | -C23  | 1.5366 (18) |
| N6  | -C15  | 1.4663 (16) | C19 | -C20  | 1.526 (2)   |
| C1  | -C15  | 1.5325 (17) | C20 | -C21  | 1.527 (2)   |
| C3  | -C4   | 1.5257 (17) | C21 | -C22  | 1.526 (2)   |
| C3  | -C24  | 1.5407 (18) | C22 | -C23  | 1.531 (2)   |
| C7  | -C8   | 1.522 (2)   | C24 | -C25  | 1.5452 (18) |
| C8  | -C9   | 1.516 (2)   | C25 | -C26  | 1.526 (2)   |
| C9  | -C10  | 1.3985 (19) | C25 | -C27  | 1.531 (2)   |
| C9  | -C14  | 1.4029 (17) | C25 | -C28  | 1.5355 (19) |
| C10 | -C11  | 1.382 (2)   |     |       |             |
|     |       |             |     |       |             |
| C1  | -H11  | 0.968 (13)  | C21 | -H211 | 1.028 (18)  |
| C1  | -H12  | 0.993 (14)  | C21 | -H212 | 0.989 (17)  |
| C3  | -H31  | 0.964 (12)  | C22 | -H221 | 1.010 (18)  |
| C7  | -H71  | 1.032 (17)  | C22 | -H222 | 1.010 (17)  |
| C7  | -H72  | 0.981 (17)  | C23 | -H231 | 0.978 (17)  |
| C8  | -H81  | 1.000 (18)  | C23 | -H232 | 1.002 (18)  |
| C8  | -H82  | 0.992 (15)  | C24 | -H241 | 0.988 (14)  |
| C10 | -H101 | 0.990 (17)  | C24 | -H242 | 0.997 (18)  |
| C11 | -H111 | 0.981 (17)  | C26 | -H261 | 1.001 (17)  |
| C12 | -H121 | 0.963 (17)  | C26 | -H262 | 1.008 (19)  |
| C13 | -H131 | 0.971 (16)  | C26 | -H263 | 1.006 (17)  |
| C15 | -H151 | 0.994 (12)  | C27 | -H271 | 0.990 (17)  |
| C18 | -H181 | 0.957 (17)  | C27 | -H272 | 0.988 (17)  |
| C19 | -H191 | 0.987 (18)  | C27 | -H273 | 0.988 (18)  |
| C19 | -H192 | 0.992 (17)  | C28 | -H281 | 1.017 (18)  |
| C20 | -H201 | 1.019 (18)  | C28 | -H282 | 1.015 (17)  |
| C20 | -H202 | 0.992 (16)  | C28 | -H283 | 0.985 (17)  |

**Table S2** - Bond Angles (Degrees) for **9e**

|     |      |      |             |     |      |      |             |
|-----|------|------|-------------|-----|------|------|-------------|
| C1  | -N2  | -C3  | 111.62 (9)  | C9  | -C14 | -C15 | 121.22 (11) |
| C1  | -N2  | -C16 | 126.53 (10) | C13 | -C14 | -C15 | 119.40 (11) |
| C3  | -N2  | -C16 | 118.69 (10) | N6  | -C15 | -C1  | 109.69 (10) |
| C4  | -N6  | -C7  | 119.50 (12) | N6  | -C15 | -C14 | 110.40 (10) |
| C4  | -N6  | -C15 | 126.85 (10) | C1  | -C15 | -C14 | 114.87 (10) |
| C7  | -N6  | -C15 | 113.26 (11) | O17 | -C16 | -N2  | 120.93 (11) |
| N2  | -C1  | -C15 | 110.75 (10) | O17 | -C16 | -C18 | 119.61 (10) |
| N2  | -C3  | -C4  | 110.08 (10) | N2  | -C16 | -C18 | 119.35 (10) |
| N2  | -C3  | -C24 | 114.94 (10) | C16 | -C18 | -C19 | 110.16 (11) |
| C4  | -C3  | -C24 | 111.55 (10) | C16 | -C18 | -C23 | 108.79 (10) |
| O5  | -C4  | -N6  | 122.31 (11) | C19 | -C18 | -C23 | 110.88 (10) |
| O5  | -C4  | -C3  | 119.04 (11) | C18 | -C19 | -C20 | 111.12 (13) |
| N6  | -C4  | -C3  | 118.59 (10) | C19 | -C20 | -C21 | 111.17 (12) |
| N6  | -C7  | -C8  | 107.60 (10) | C20 | -C21 | -C22 | 111.14 (12) |
| C7  | -C8  | -C9  | 111.06 (13) | C21 | -C22 | -C23 | 110.82 (13) |
| C8  | -C9  | -C10 | 120.18 (12) | C18 | -C23 | -C22 | 111.05 (11) |
| C8  | -C9  | -C14 | 121.09 (11) | C3  | -C24 | -C25 | 117.31 (10) |
| C10 | -C9  | -C14 | 118.69 (12) | C24 | -C25 | -C26 | 110.23 (11) |
| C9  | -C10 | -C11 | 121.43 (14) | C24 | -C25 | -C27 | 112.24 (11) |

|      |      |       |             |      |      |       |             |
|------|------|-------|-------------|------|------|-------|-------------|
| C10  | -C11 | -C12  | 119.70 (13) | C24  | -C25 | -C28  | 106.66 (11) |
| C11  | -C12 | -C13  | 119.65 (14) | C26  | -C25 | -C27  | 109.57 (12) |
| C12  | -C13 | -C14  | 121.07 (12) | C26  | -C25 | -C28  | 108.84 (11) |
| C9   | -C14 | -C13  | 119.30 (11) | C27  | -C25 | -C28  | 109.21 (11) |
| N2   | -C1  | -H11  | 111.8 (7)   | C21  | -C20 | -H202 | 109.8 (9)   |
| N2   | -C1  | -H12  | 107.5 (7)   | H201 | -C20 | -H202 | 108.3 (13)  |
| C15  | -C1  | -H11  | 111.3 (7)   | C20  | -C21 | -H211 | 108.3 (9)   |
| C15  | -C1  | -H12  | 107.8 (8)   | C20  | -C21 | -H212 | 108.9 (9)   |
| H11  | -C1  | -H12  | 107.4 (10)  | C22  | -C21 | -H211 | 109.2 (9)   |
| N2   | -C3  | -H31  | 105.3 (8)   | C22  | -C21 | -H212 | 111.2 (10)  |
| C4   | -C3  | -H31  | 104.3 (8)   | H211 | -C21 | -H212 | 107.9 (13)  |
| C24  | -C3  | -H31  | 110.0 (8)   | C21  | -C22 | -H221 | 110.4 (10)  |
| N6   | -C7  | -H71  | 108.4 (9)   | C21  | -C22 | -H222 | 108.9 (10)  |
| N6   | -C7  | -H72  | 107.7 (9)   | C23  | -C22 | -H221 | 109.7 (10)  |
| C8   | -C7  | -H71  | 110.3 (8)   | C23  | -C22 | -H222 | 110.2 (10)  |
| C8   | -C7  | -H72  | 113.1 (9)   | H221 | -C22 | -H222 | 106.8 (14)  |
| H71  | -C7  | -H72  | 109.7 (13)  | C18  | -C23 | -H231 | 109.6 (9)   |
| C7   | -C8  | -H81  | 108.6 (9)   | C18  | -C23 | -H232 | 108.5 (9)   |
| C7   | -C8  | -H82  | 110.2 (9)   | C22  | -C23 | -H231 | 109.9 (10)  |
| C9   | -C8  | -H81  | 109.7 (9)   | C22  | -C23 | -H232 | 109.9 (9)   |
| C9   | -C8  | -H82  | 109.2 (10)  | H231 | -C23 | -H232 | 107.8 (13)  |
| H81  | -C8  | -H82  | 108.1 (14)  | C3   | -C24 | -H241 | 107.2 (8)   |
| C9   | -C10 | -H101 | 118.4 (9)   | C3   | -C24 | -H242 | 109.4 (8)   |
| C11  | -C10 | -H101 | 120.2 (9)   | C25  | -C24 | -H241 | 107.1 (8)   |
| C10  | -C11 | -H111 | 119.9 (10)  | C25  | -C24 | -H242 | 108.5 (8)   |
| C12  | -C11 | -H111 | 120.4 (10)  | H241 | -C24 | -H242 | 106.8 (11)  |
| C11  | -C12 | -H121 | 120.3 (9)   | C25  | -C26 | -H261 | 111.3 (10)  |
| C13  | -C12 | -H121 | 120.1 (9)   | C25  | -C26 | -H262 | 111.3 (11)  |
| C12  | -C13 | -H131 | 118.9 (9)   | C25  | -C26 | -H263 | 110.6 (10)  |
| C14  | -C13 | -H131 | 120.1 (9)   | H261 | -C26 | -H262 | 109.1 (15)  |
| N6   | -C15 | -H151 | 106.9 (7)   | H261 | -C26 | -H263 | 106.3 (14)  |
| C1   | -C15 | -H151 | 107.3 (7)   | H262 | -C26 | -H263 | 108.2 (15)  |
| C14  | -C15 | -H151 | 107.3 (7)   | C25  | -C27 | -H271 | 112.2 (10)  |
| C16  | -C18 | -H181 | 110.9 (9)   | C25  | -C27 | -H272 | 109.9 (10)  |
| C19  | -C18 | -H181 | 108.6 (9)   | C25  | -C27 | -H273 | 111.9 (10)  |
| C23  | -C18 | -H181 | 107.4 (9)   | H271 | -C27 | -H272 | 106.8 (14)  |
| C18  | -C19 | -H191 | 108.2 (8)   | H271 | -C27 | -H273 | 107.9 (14)  |
| C18  | -C19 | -H192 | 108.3 (10)  | H272 | -C27 | -H273 | 107.9 (14)  |
| C20  | -C19 | -H191 | 110.3 (8)   | C25  | -C28 | -H281 | 111.2 (9)   |
| C20  | -C19 | -H192 | 111.6 (10)  | C25  | -C28 | -H282 | 110.1 (10)  |
| H191 | -C19 | -H192 | 107.2 (14)  | C25  | -C28 | -H283 | 111.7 (10)  |
| C19  | -C20 | -H201 | 109.3 (9)   | H281 | -C28 | -H282 | 108.1 (14)  |
| C19  | -C20 | -H202 | 109.3 (10)  | H281 | -C28 | -H283 | 107.1 (14)  |
| C21  | -C20 | -H201 | 108.9 (9)   | H282 | -C28 | -H283 | 108.3 (14)  |

**Figure F1** –ORTEP drawing with 50% ellipsoids for **9e**

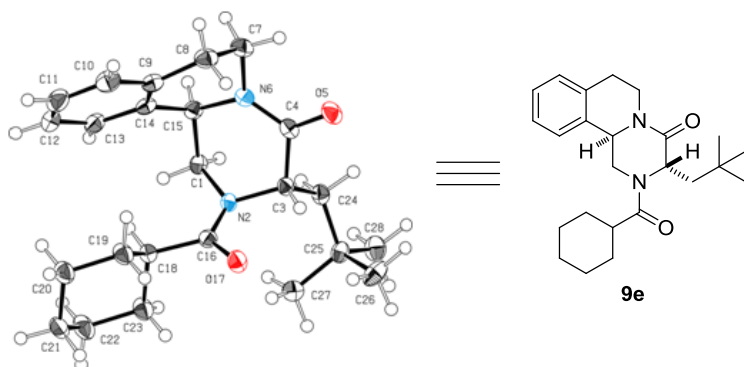

## 5 BIOLOGY

### Material and Methods

Syrian golden hamsters (*Mesocricetus auratus*) 100-120 gm each, were obtained from the Schistosome Biological Supply Center (SBSC), Theodor Bilharz Research Institute. They were fed on a standard pelleted diet containing 24% protein, 4% fat and 4-5% fiber and water. *Schistosoma mansoni* cercariae shed from *Biomphalaria alexandrina* snails were used to infect Syrian golden (*Mesocricetus auratus*) hamsters weighing 100-120 g with 350 cercariae each using abdominal skin exposure. Compounds (PZQ derivatives) were prepared as 5 mM stock solutions in DMSO. At day of sacrifice, the stock solution was diluted with complete medium to produce concentrations ranging from 0.4 to 100  $\mu$ M.

**In vitro schistosome worm killing assay:** The mother PZQ (Shin Poong Pharmaceutical Co., South Korea) and PZQ derivatives were prepared as 5 mM stock solutions. Immediately before use, the stock solutions were diluted with complete medium to diminishing concentrations of 100, 75, 50, 25, 12.5, 6.0, 30, 1.5, 0.8, 0.4  $\mu$ M. *S. mansoni* infected hamsters were sacrificed and worms harvested from the portomesenteric vessels to recover adult schistosomes. Worms was cultured on duplicate Petri dishes with a density of 12 to 16 worms per dish with RPMI 1640 medium (glutamine, 20% fetal calf serum, and antibiotics [streptomycin, penicillin and gentamicin] containing the indicated concentration of test compound was added. The worms were incubated overnight in a CO<sub>2</sub> incubator, washed twice with FBS, and fresh medium without drug was added and the incubation was continued overnight. On the second day, worm motility was observed and the medium was changed again and the incubation continued. On day 5 the numbers of living and dead worms were recorded. Negative controls using pure medium alone or medium with DMSO and positive control media containing various concentrations of PZQ were similarly evaluated. At the end of observation period, worms were examined in a laminar flow hood for their motility and appearance using a stereomicroscope and the final recording of percent mortality was assessed (the number of dead worms [contracted and opaque] relative to the number of worms). The percentages of *Schistosoma mansoni* worm killing in vitro under the influences of different test PZQ derivatives in different concentrations versus untreated and DMSO negative controls and positive controls treated with the mother drug PZQ were determined. Different compounds EC<sub>50</sub>'s were computed using computerized program "Pharm/PCS" Version 4.2 (Pharmacologic calculation system) by a plot of the percent of worms mortality (versus living worms) against the concentration of the drug.



## 6 Copies of NMR spectra

LHX-69, CDC13, 600 MHz

7.266  
7.095  
7.089  
7.081  
6.818  
6.815  
6.804  
6.801  
6.787  
6.690  
5.159  
5.154  
5.137  
5.132  
4.825  
4.818  
4.805  
4.770  
4.764  
4.753  
4.746  
4.485  
4.456  
4.095  
4.066  
3.841  
3.793  
2.928  
2.921  
2.902  
2.878  
2.857  
2.837  
2.820  
2.816  
2.798  
2.735  
2.731  
2.707  
2.487  
2.482  
2.473  
2.468  
2.463  
2.454  
2.449  
2.444  
1.832  
1.816  
1.761  
1.657  
1.283  
1.272  
1.268  
-0.000

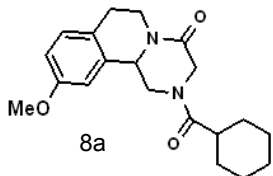

2-(cyclohexanecarbonyl)-10-methoxy-2,3,6,7-tetrahydro-1H-pyrazino[2,1-a]isoquinolin-4(11bH)-one

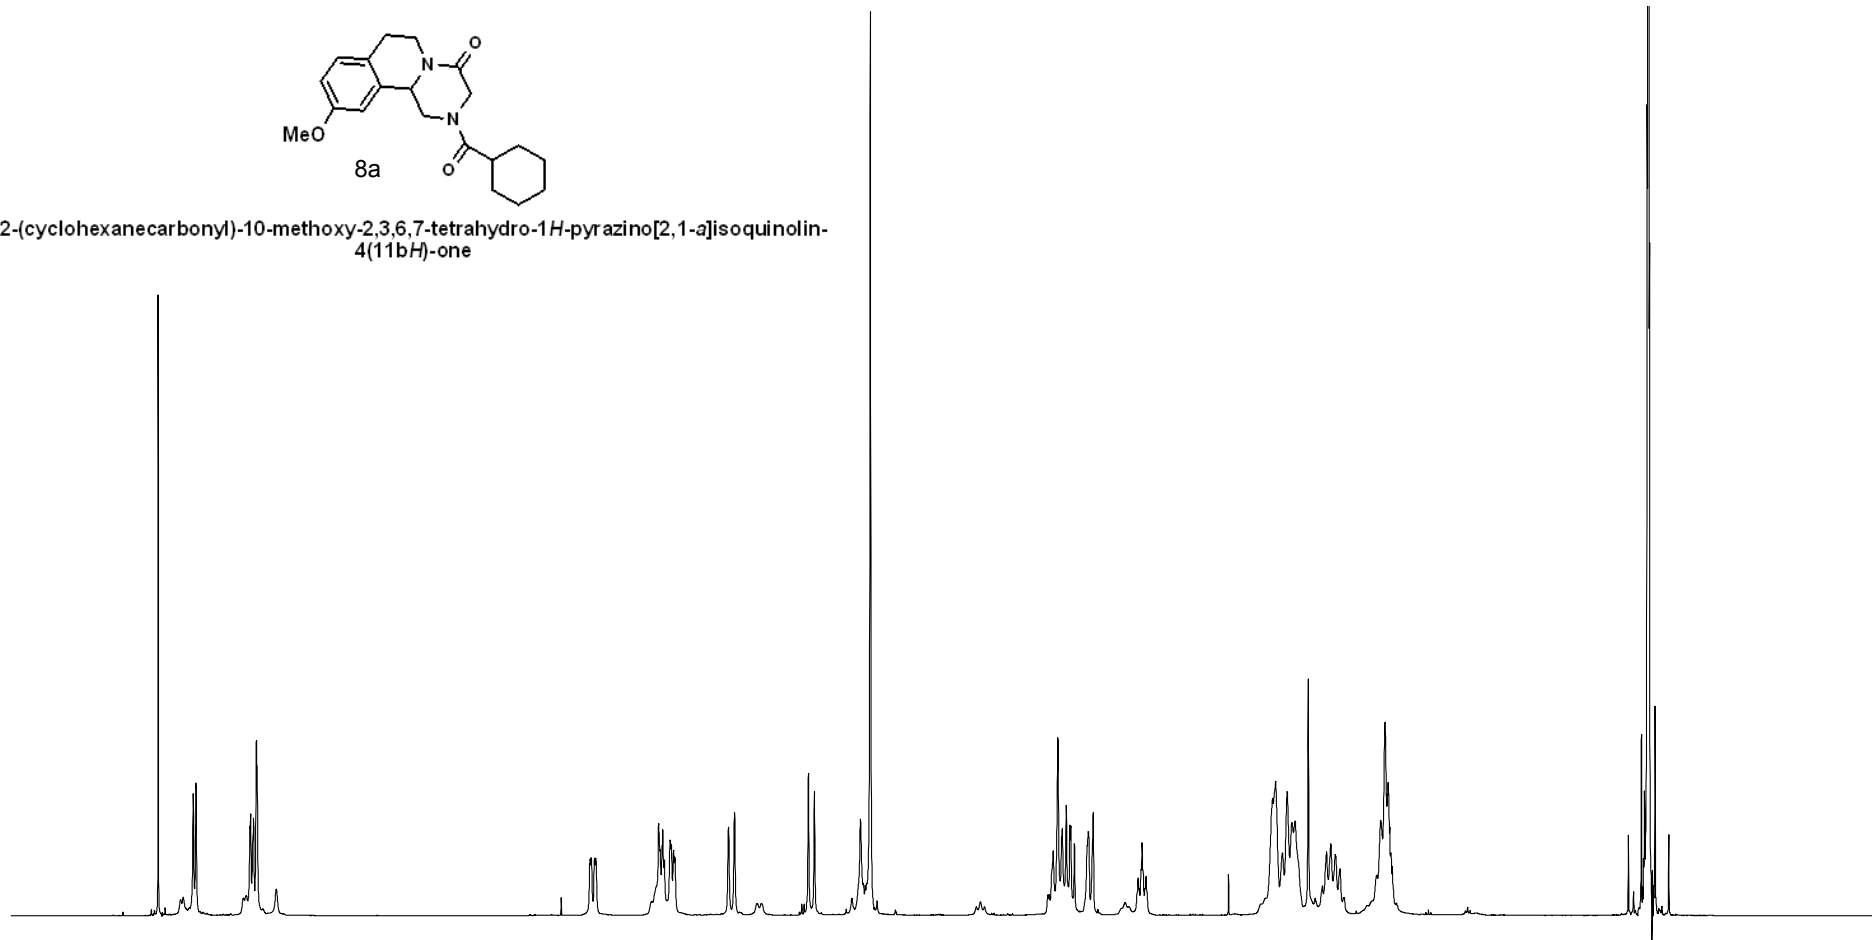

7.5 7.0 6.5 6.0 5.5 5.0 4.5 4.0 3.5 3.0 2.5 2.0 1.5 1.0 0.5 0.0 -0.5 ppm

0.98

1.93

0.76

2.14

0.76

0.19

0.79

3.10

SI-18

0.20

3.75

1.00

11.17

LHX-69, CDCl<sub>3</sub>, 600 MHz

174.82

164.36

158.51

133.69

130.60

130.26

126.67

114.08

112.41

111.60

110.05

77.24

77.03

76.81

55.81

55.43

55.08

49.56

49.02

46.31

45.18

40.79

39.36

38.95

29.54

29.24

29.01

28.02

27.90

25.70

25.67

0.16

-0.00

-0.17

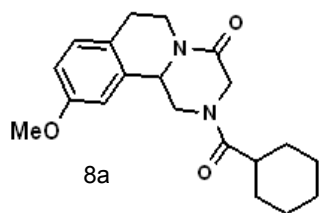

2-(cyclohexanecarbonyl)-10-methoxy-2,3,6,7-tetrahydro-1H-pyrazino[2,1-a]isoquinolin-4(11bH)-one

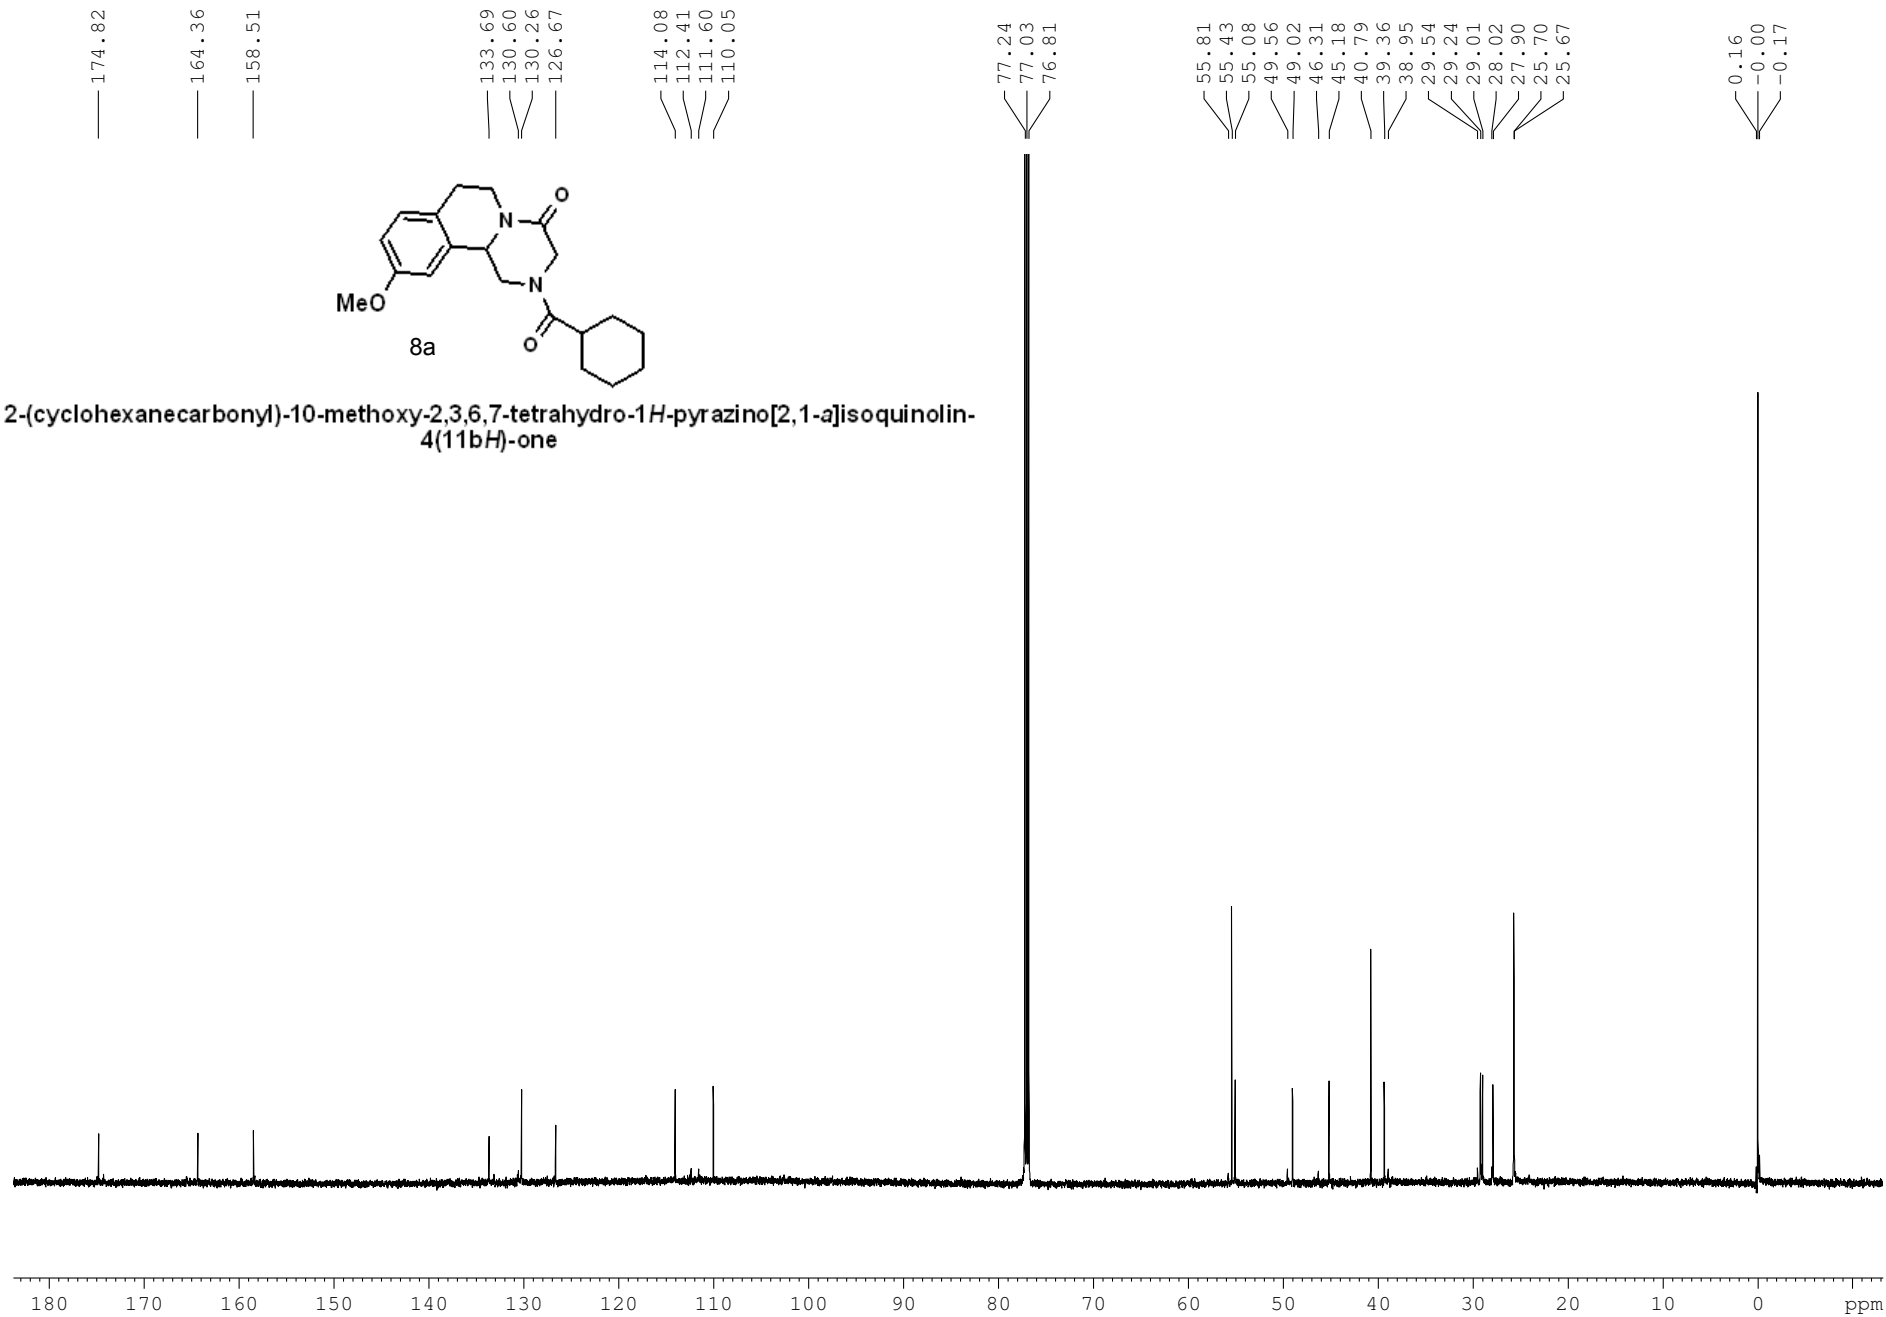

LHX-134, CDCl<sub>3</sub>, 600 MHz

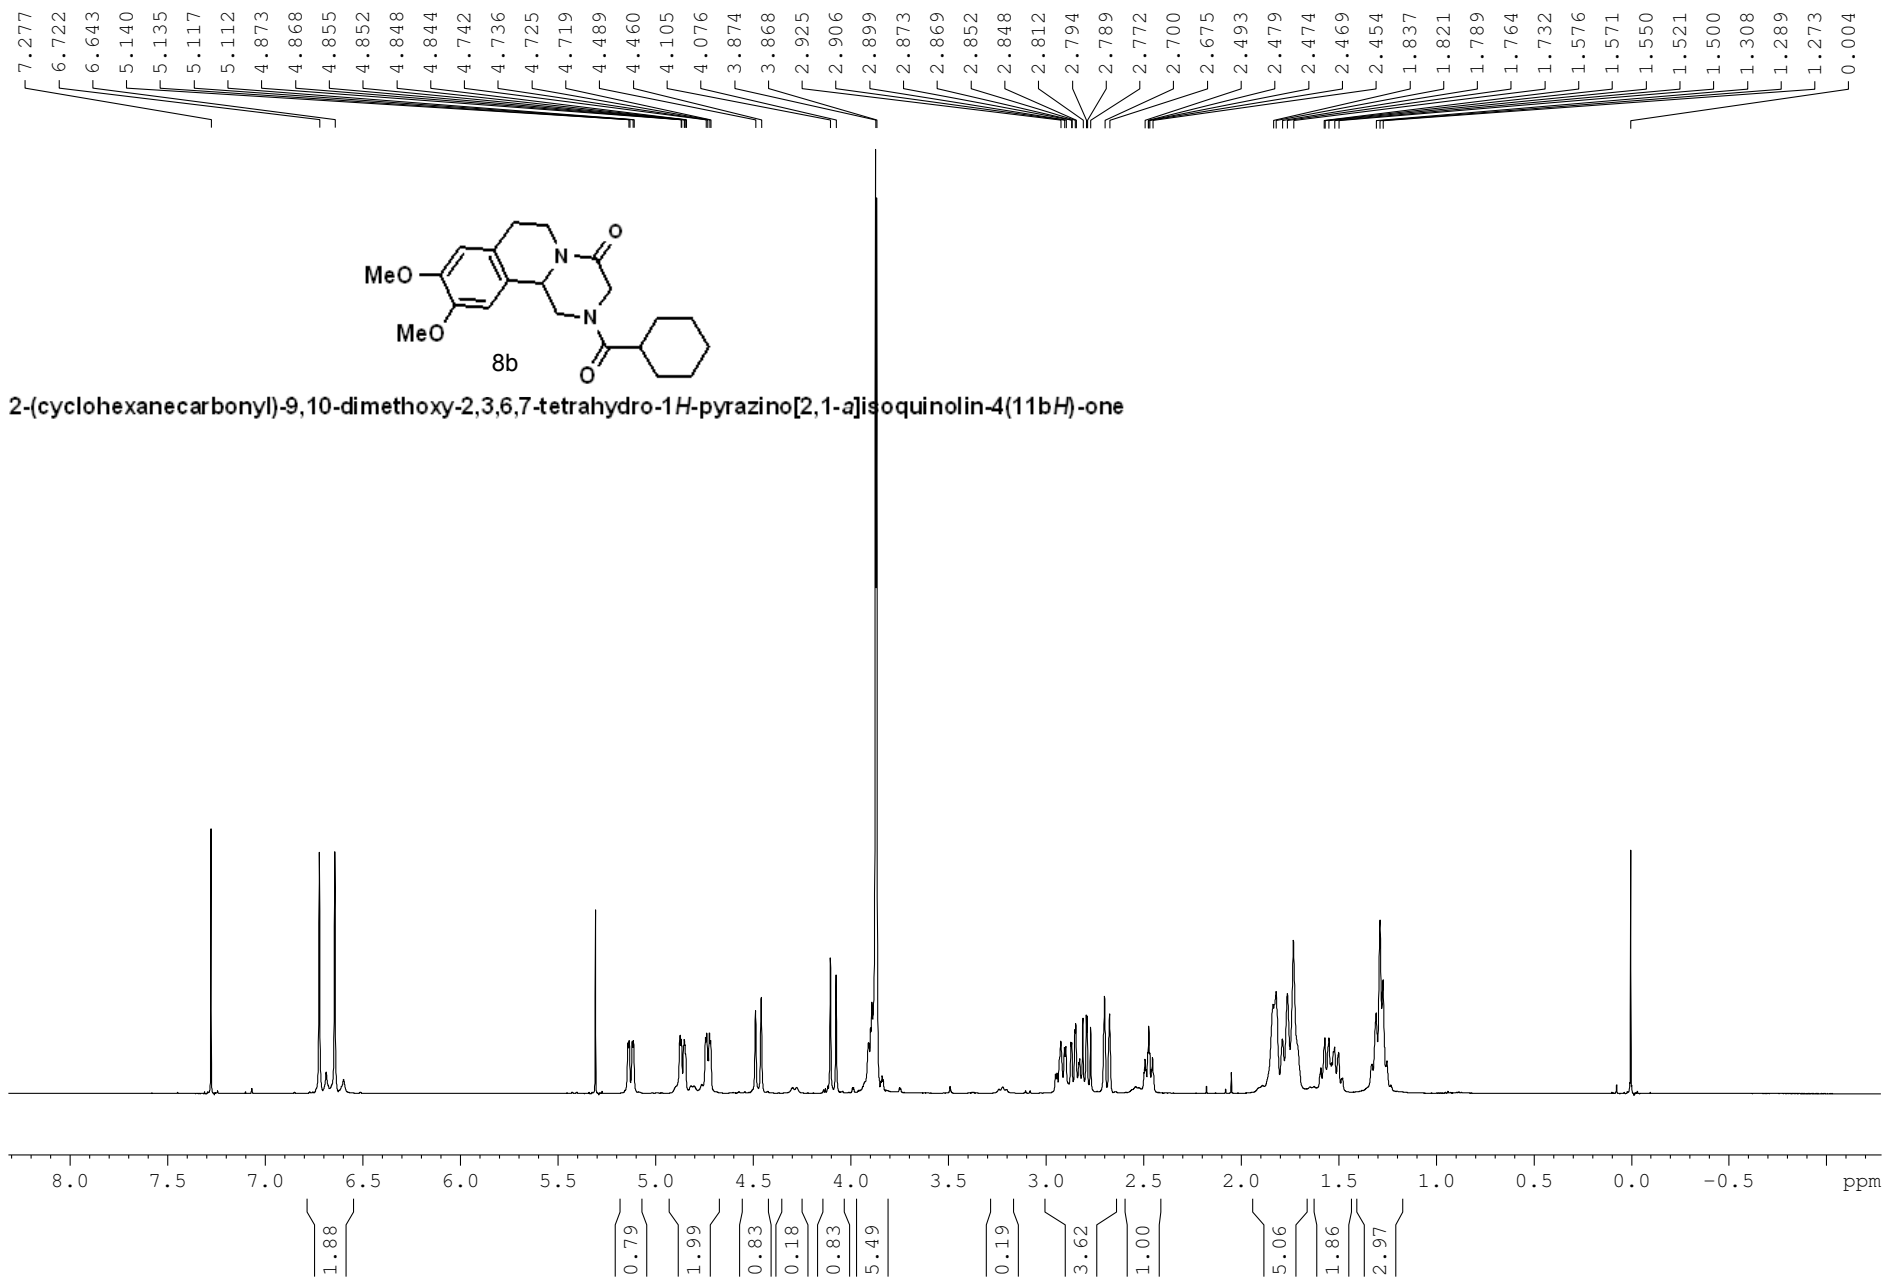

SI-20

LHX-134, CDCl<sub>3</sub>, 600 MHz

174.86  
164.33  
148.26  
148.06  
126.89  
124.38  
111.62  
108.00  
77.26  
77.05  
76.83  
56.09  
55.92  
54.80  
49.00  
45.35  
40.77  
39.12  
29.24  
29.01  
28.26  
25.70  
25.68  
25.66

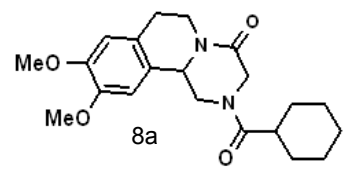

2-(cyclohexanecarbonyl)-9,10-dimethoxy-2,3,6,7-tetrahydro-1H-pyrazino[2,1-a]isoquinolin-4(11bH)-one

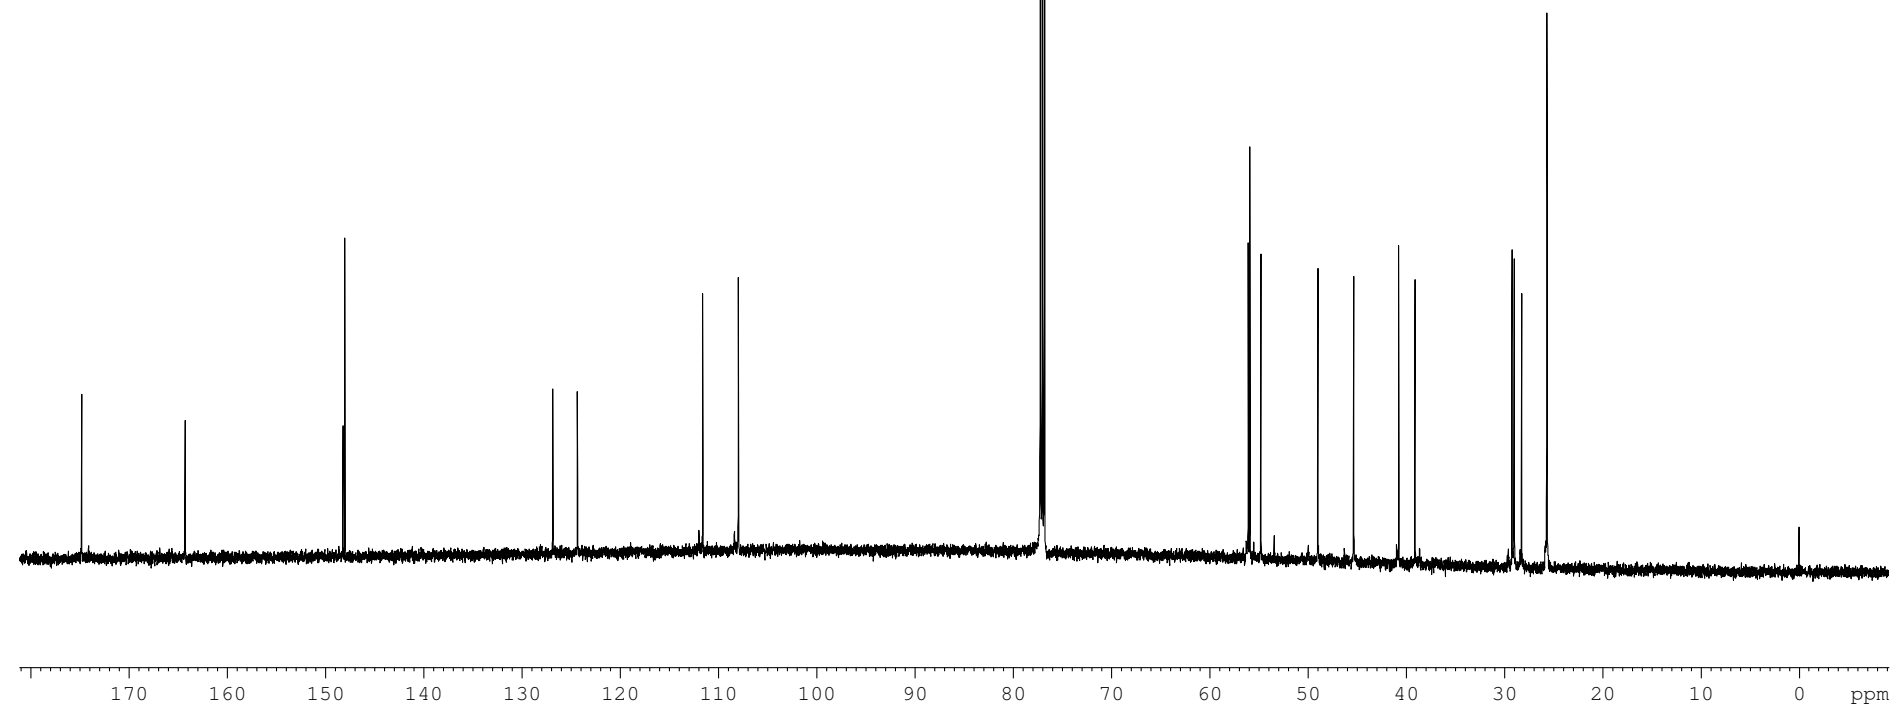

LHX-71, CDCl<sub>3</sub>, 600 MHz

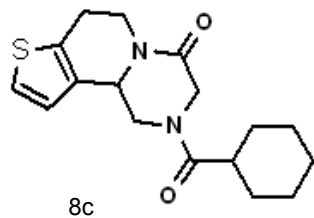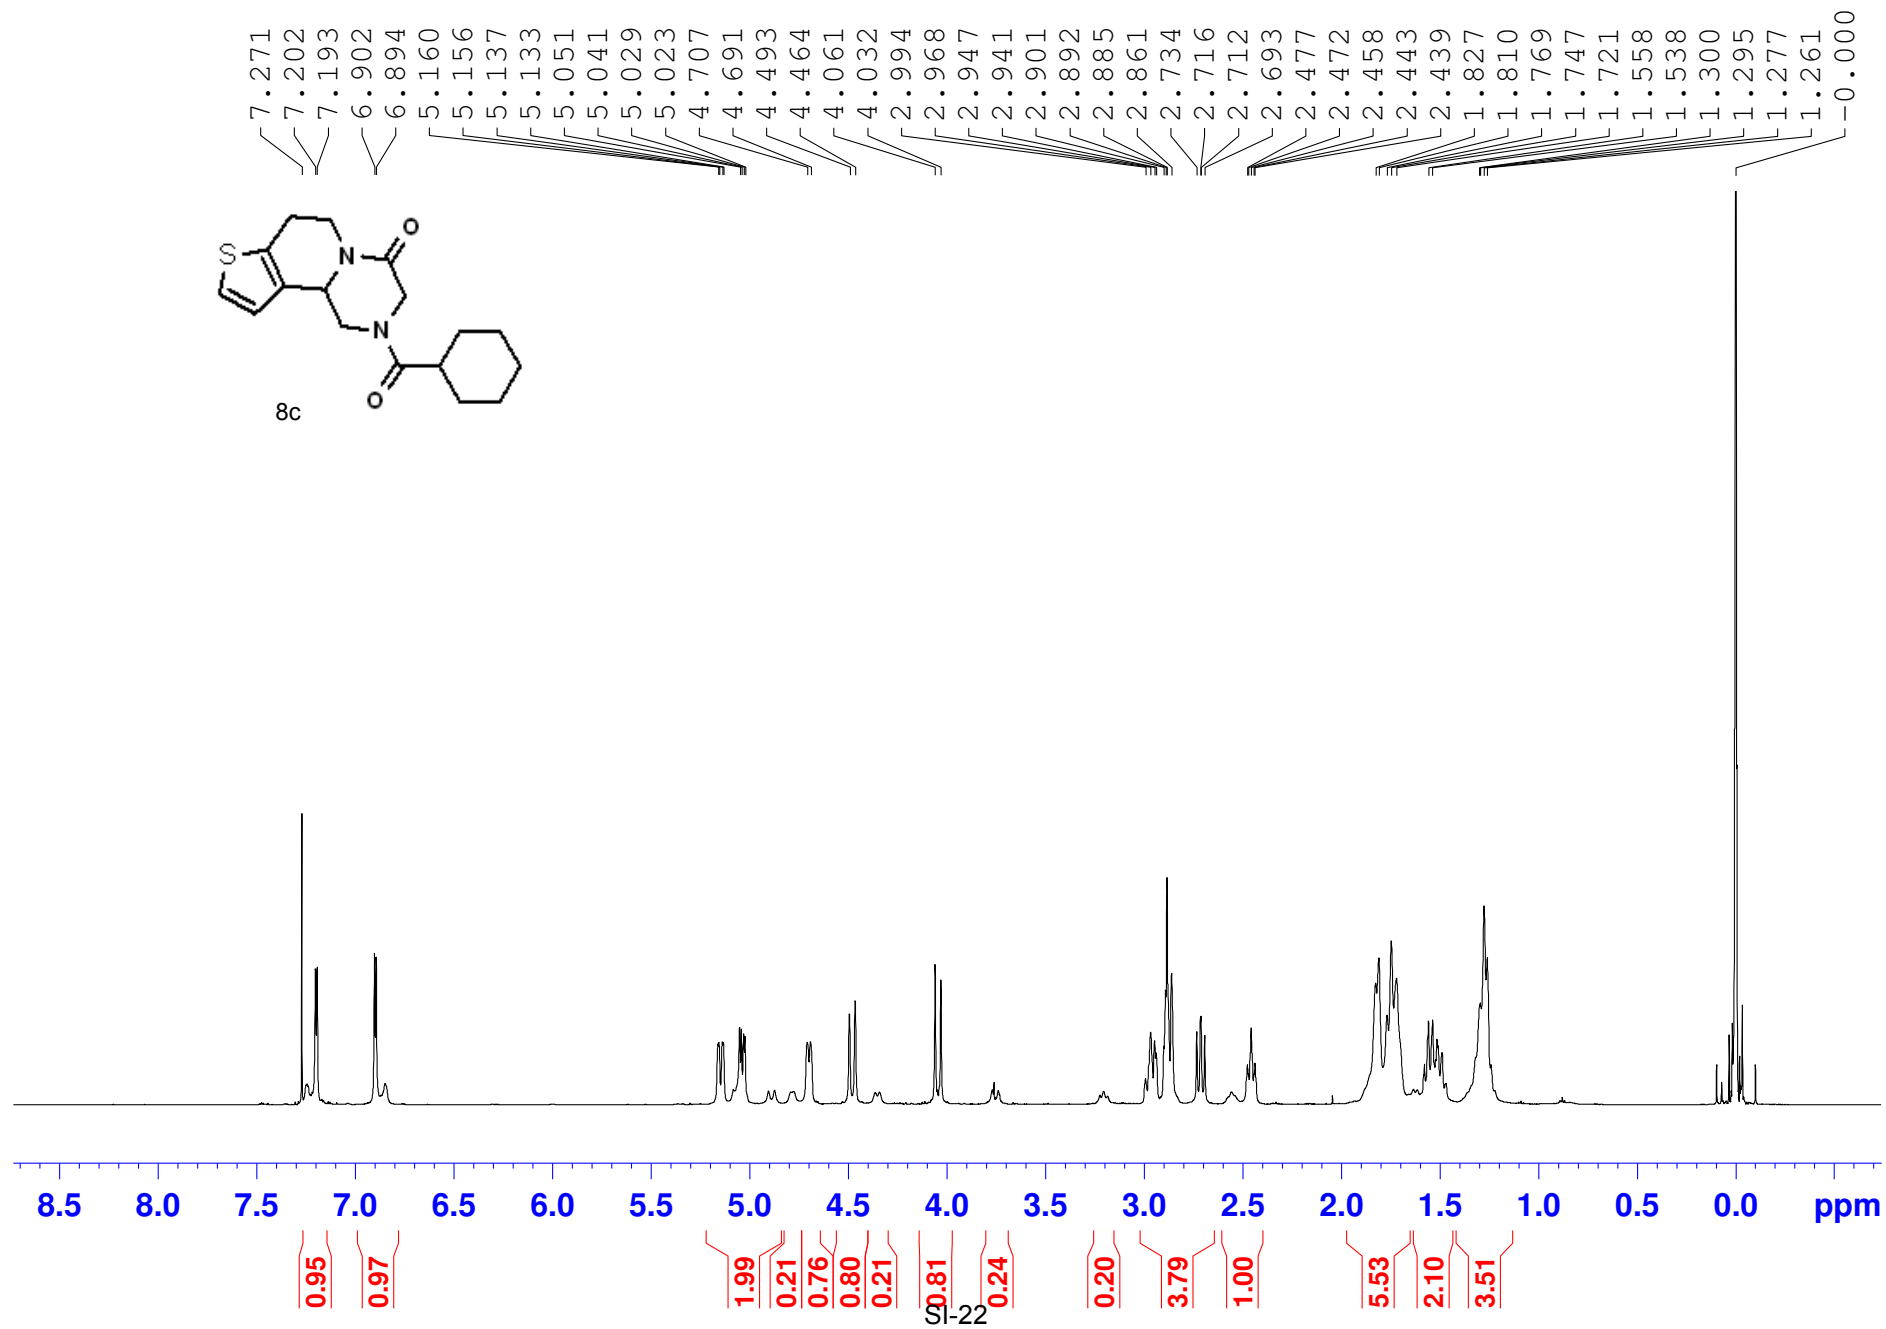

LHX-71, CDCl<sub>3</sub>, 600 MHz

174.69  
165.48  
164.40  
136.10  
135.07  
131.81  
131.01  
124.72  
124.46  
123.71  
123.04

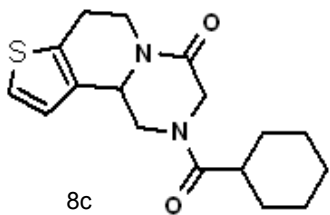

77.25  
77.04  
76.82

55.15  
54.44  
49.10  
48.33  
46.33  
44.21  
40.74  
40.62  
39.32  
38.99  
29.70  
29.55  
29.25  
28.97  
25.69  
25.66  
24.66

0.16  
-0.00  
-0.17

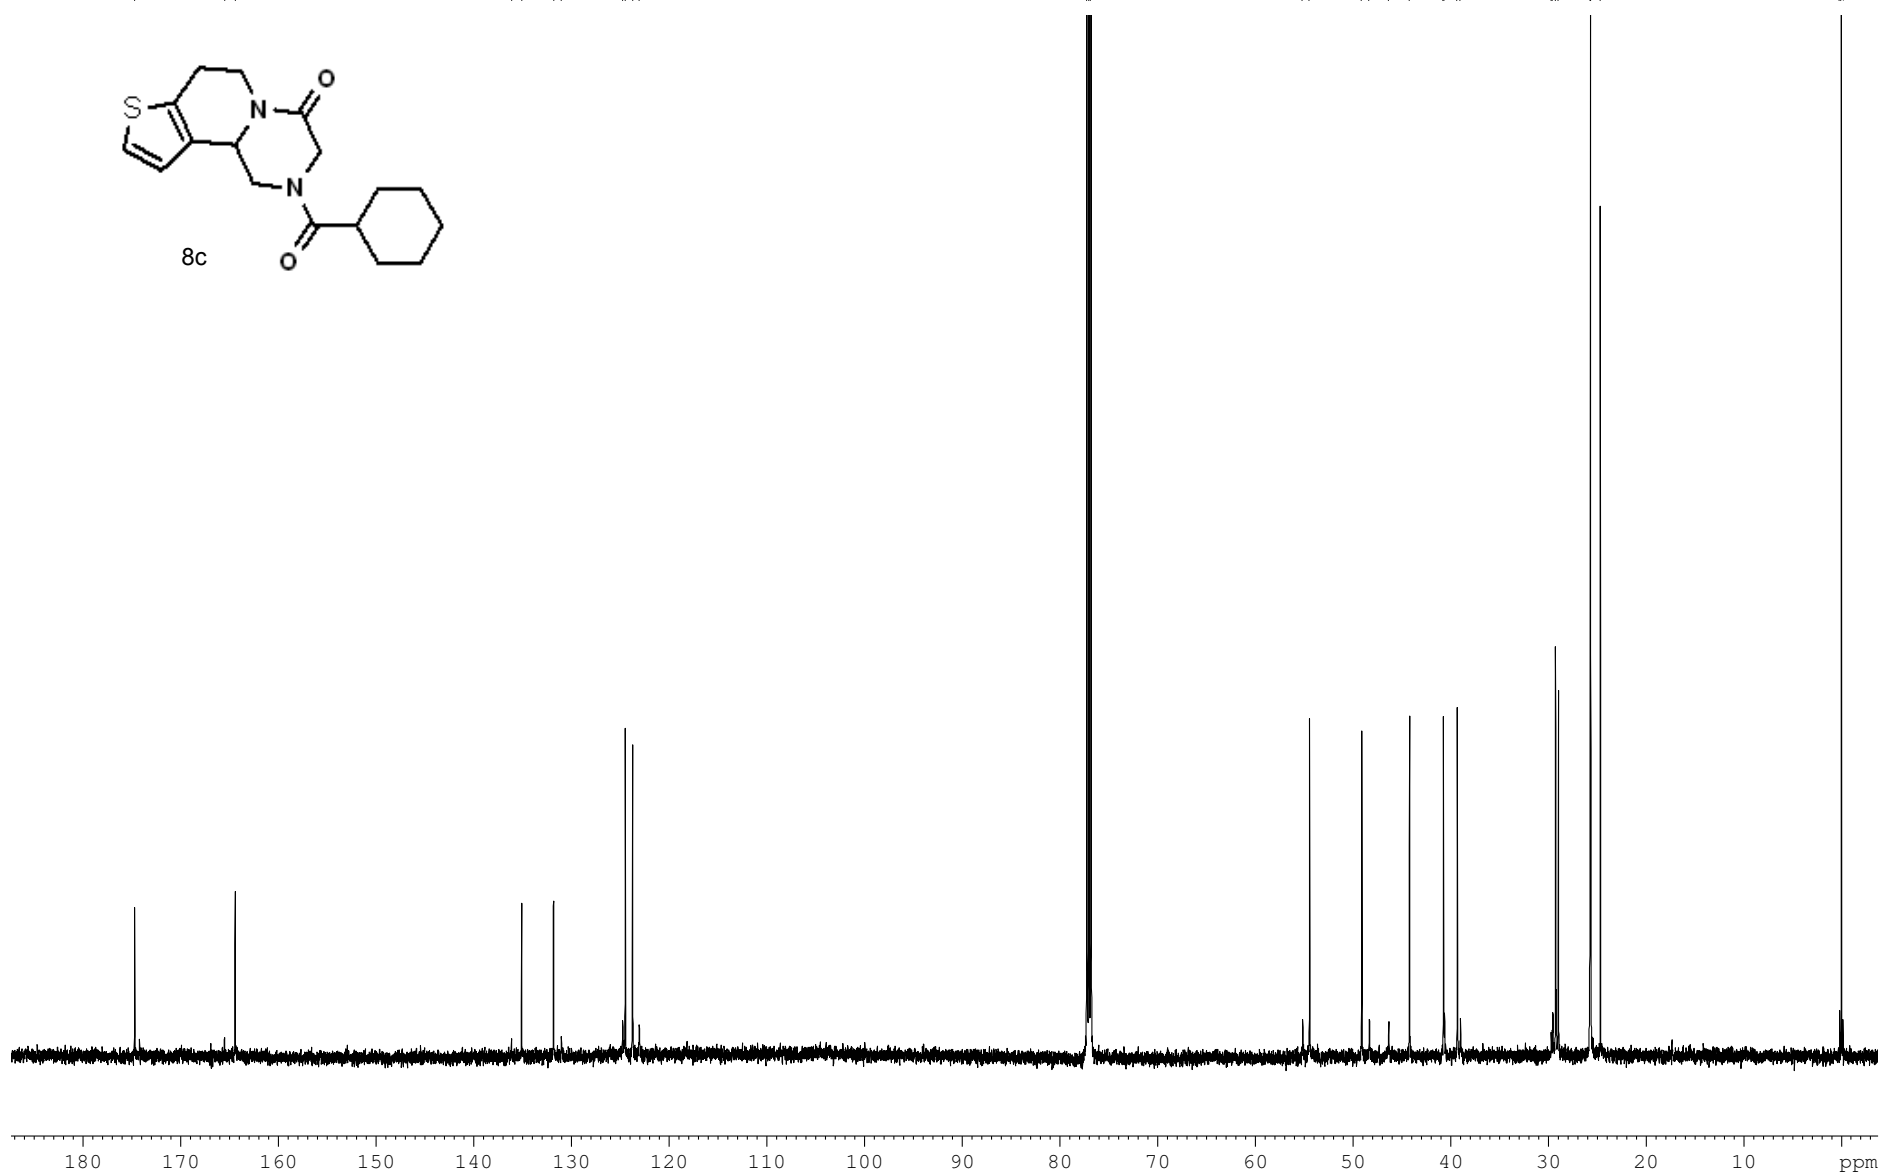

LHX-78, CDC13, 600 Mz

7.281  
7.278  
7.277  
7.270  
7.264  
7.258  
7.251  
7.200  
7.188  
5.657  
5.652  
5.648  
5.643  
4.995  
4.982  
4.964  
4.959  
4.537  
4.508  
4.226  
4.197  
3.648  
3.618  
3.310  
3.305  
3.283  
3.277  
3.205  
3.195  
3.179  
3.168  
3.001  
2.981  
2.977  
2.957  
2.509  
2.490  
1.886  
1.859  
1.837  
1.766  
1.738  
1.598  
1.578  
1.556  
1.536  
1.516  
1.415  
1.332  
1.311  
1.296  
1.282  
1.263  
0.009  
0.008

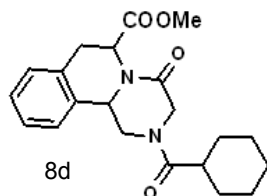

8d

methyl 2-(cyclohexanecarbonyl)-4-oxo-2,3,4,6,7,11b-hexahydro-1H-pyrazino[2,1-a]isoquinoline-6-carboxylate

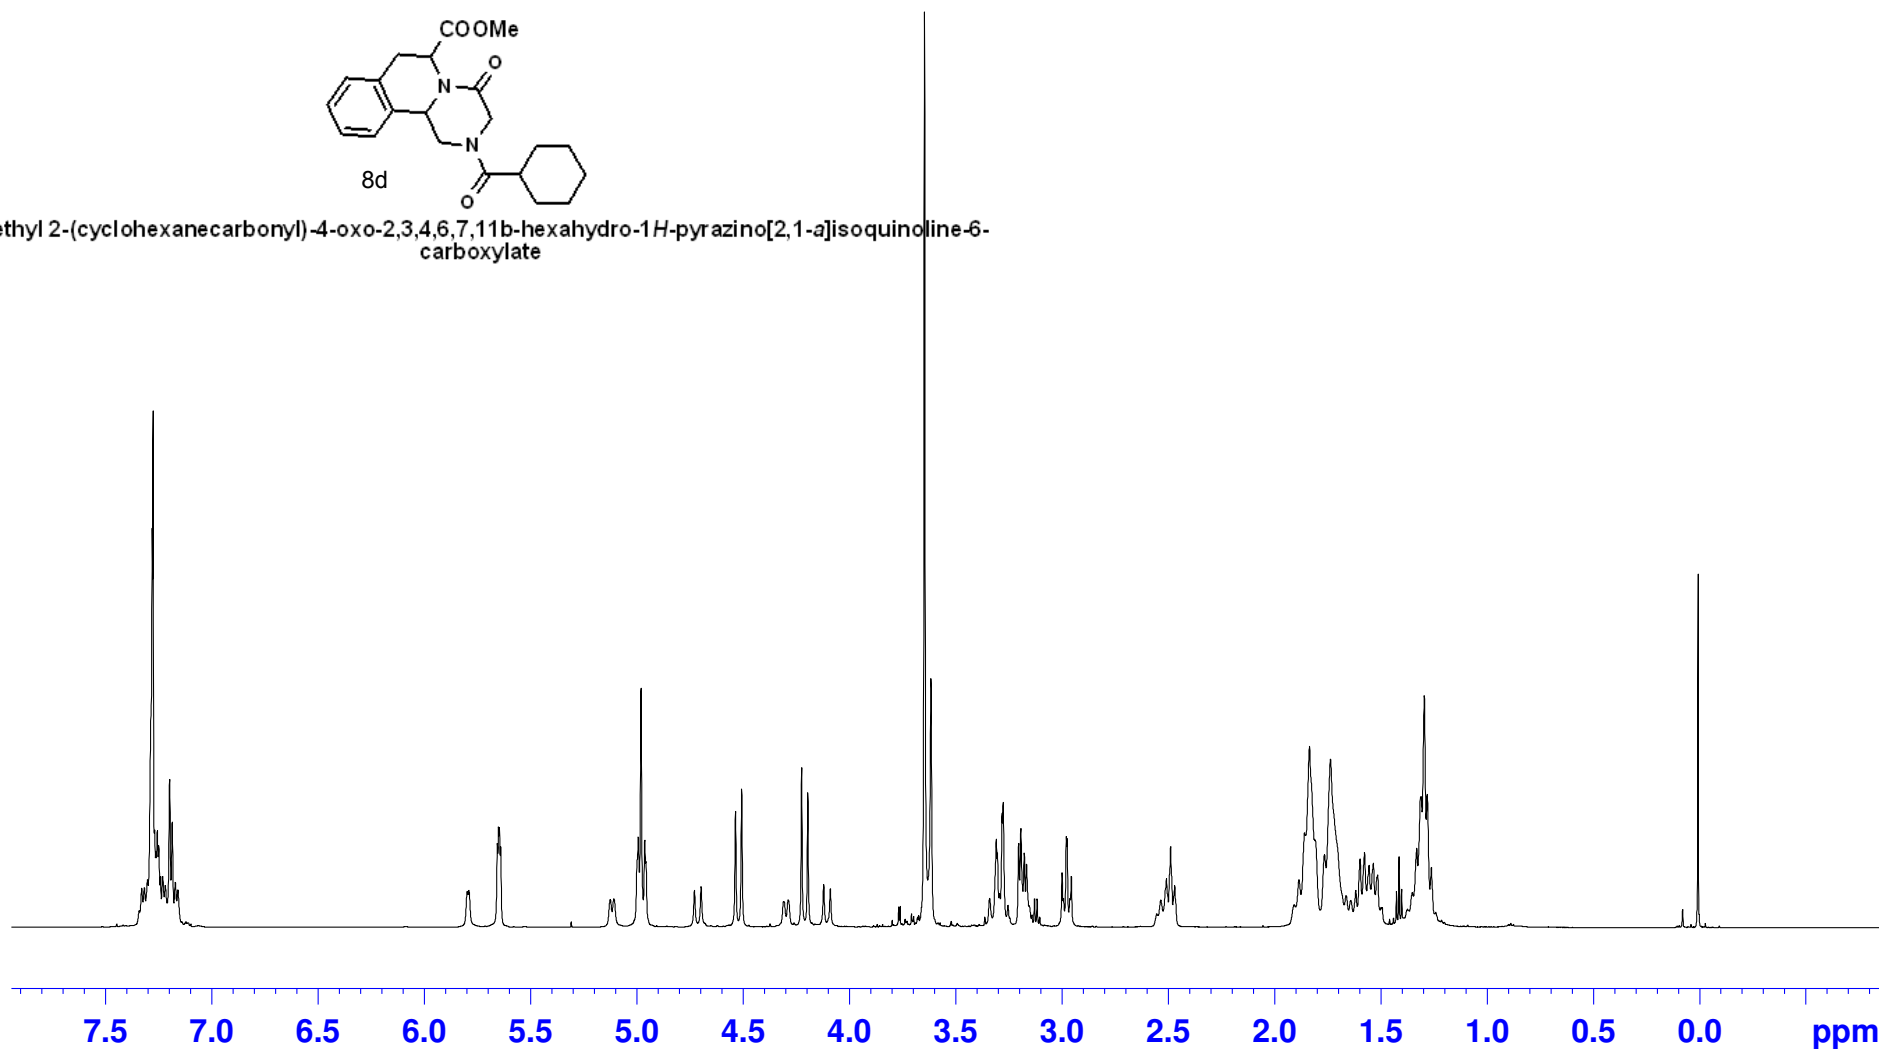

4.17

1.02

1.62

1.07

0.33

1.01

2.65  
SI-24

1.25

1.14

0.70

1.00

10.59



LHX-78, CDCl<sub>3</sub>, 600 MHz

174.92  
170.48  
165.41

131.71  
131.56  
129.13  
127.82  
127.48  
125.68

77.25  
77.04  
76.83

53.39  
52.67  
50.28  
48.77  
45.73  
40.87

30.51  
29.12  
28.97  
25.71

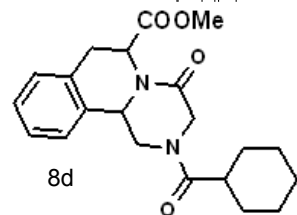

methyl 2-(cyclohexanecarbonyl)-4-oxo-2,3,4,6,7,11b-hexahydro-1H-pyrazino[2,1-a]isoquinoline-6-carboxylate

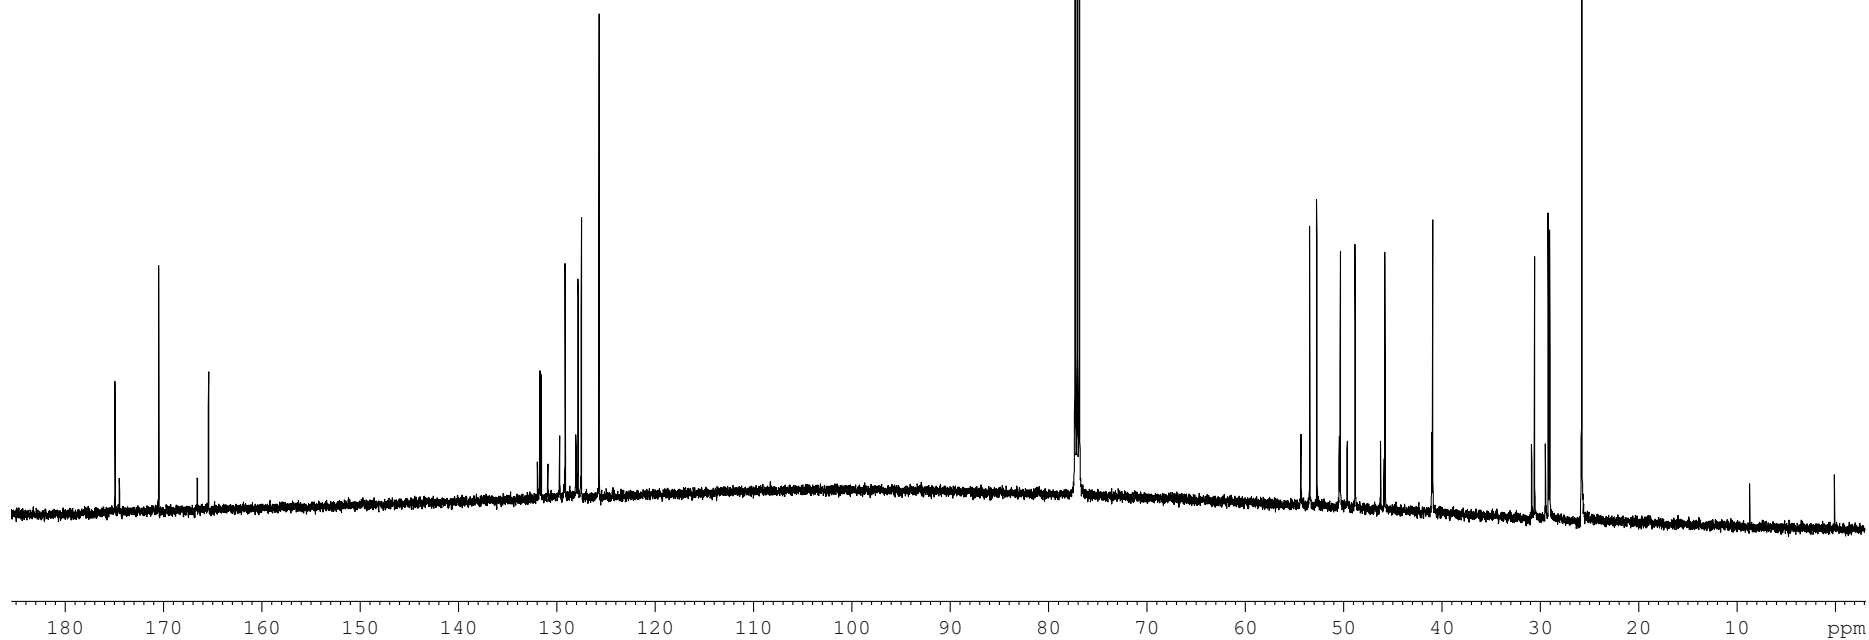

LHX-124b, CDCl<sub>3</sub>, 600 MHz

8.877  
7.519  
7.506  
7.379  
7.365  
7.263  
7.260  
7.218  
7.205  
7.192  
7.144  
7.131  
5.043  
5.033  
4.662  
4.651  
4.641  
4.488  
4.471  
4.466  
4.295  
4.281  
4.129  
4.127  
4.117  
4.115  
4.072  
4.059  
4.050  
3.717  
3.519  
3.493  
3.481  
3.121  
3.112  
2.403  
1.770  
1.726  
1.690  
1.665  
1.630  
1.545  
1.325  
1.305  
1.289  
1.273  
1.271  
1.261  
1.259  
1.253  
1.250  
1.247  
1.220  
1.197  
1.176

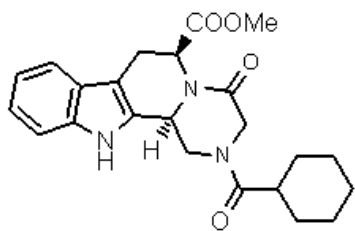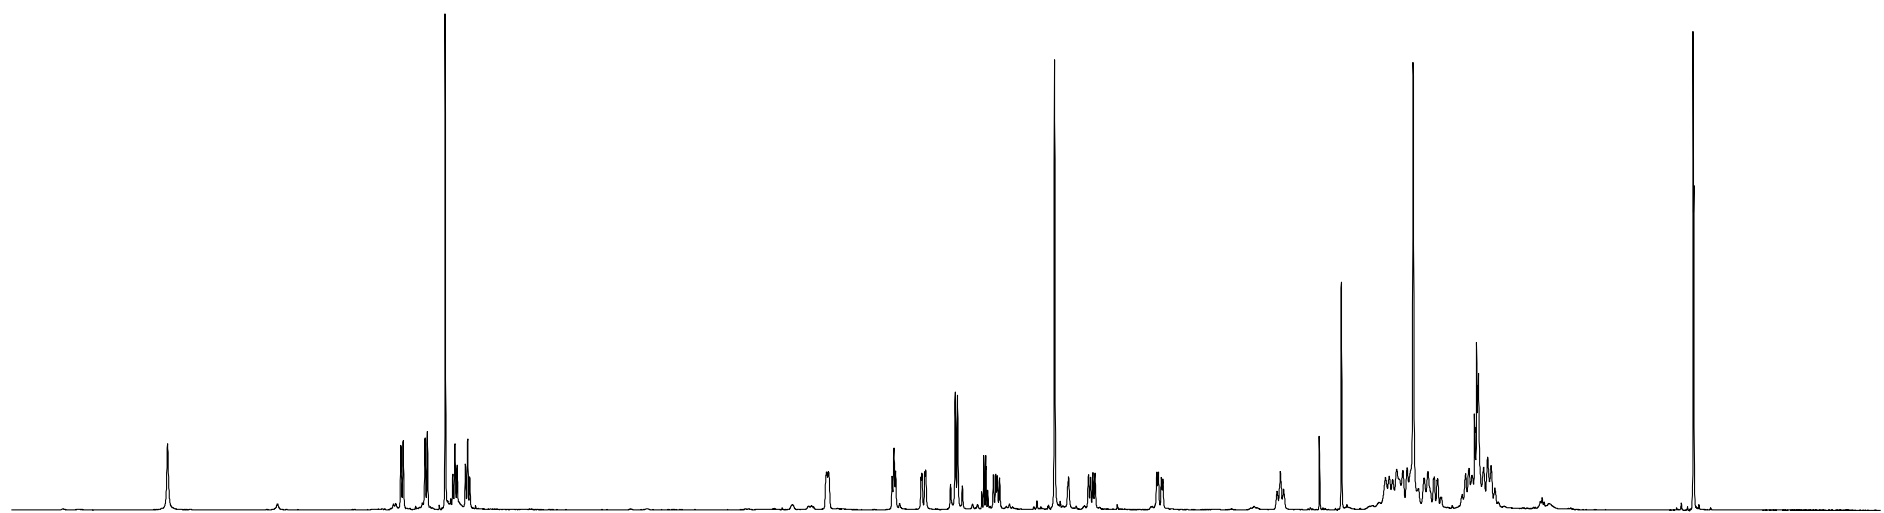

9

8

7

6

5

4

3

2

1

0

ppm

1.17

0.94

1.02

1.10

1.18

1.04

1.08

1.00

1.81

0.89

2.82

1.34

1.24

1.20

15.56

SI-26

LHX-124b, CDC13, COSY

— 175.39  
— 170.01  
— 166.70

— 136.69  
— 129.57  
— 126.48  
— 122.72  
— 120.04  
— 118.28  
— 111.63  
— 109.16

77.23  
77.02  
76.81

56.31  
53.70  
52.65  
49.36

42.94  
40.71

29.71  
29.00  
25.58  
25.53  
22.52

— 0.00

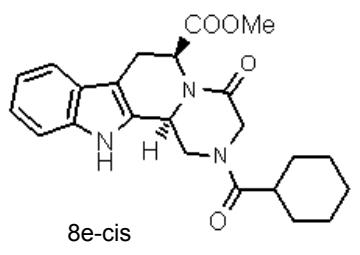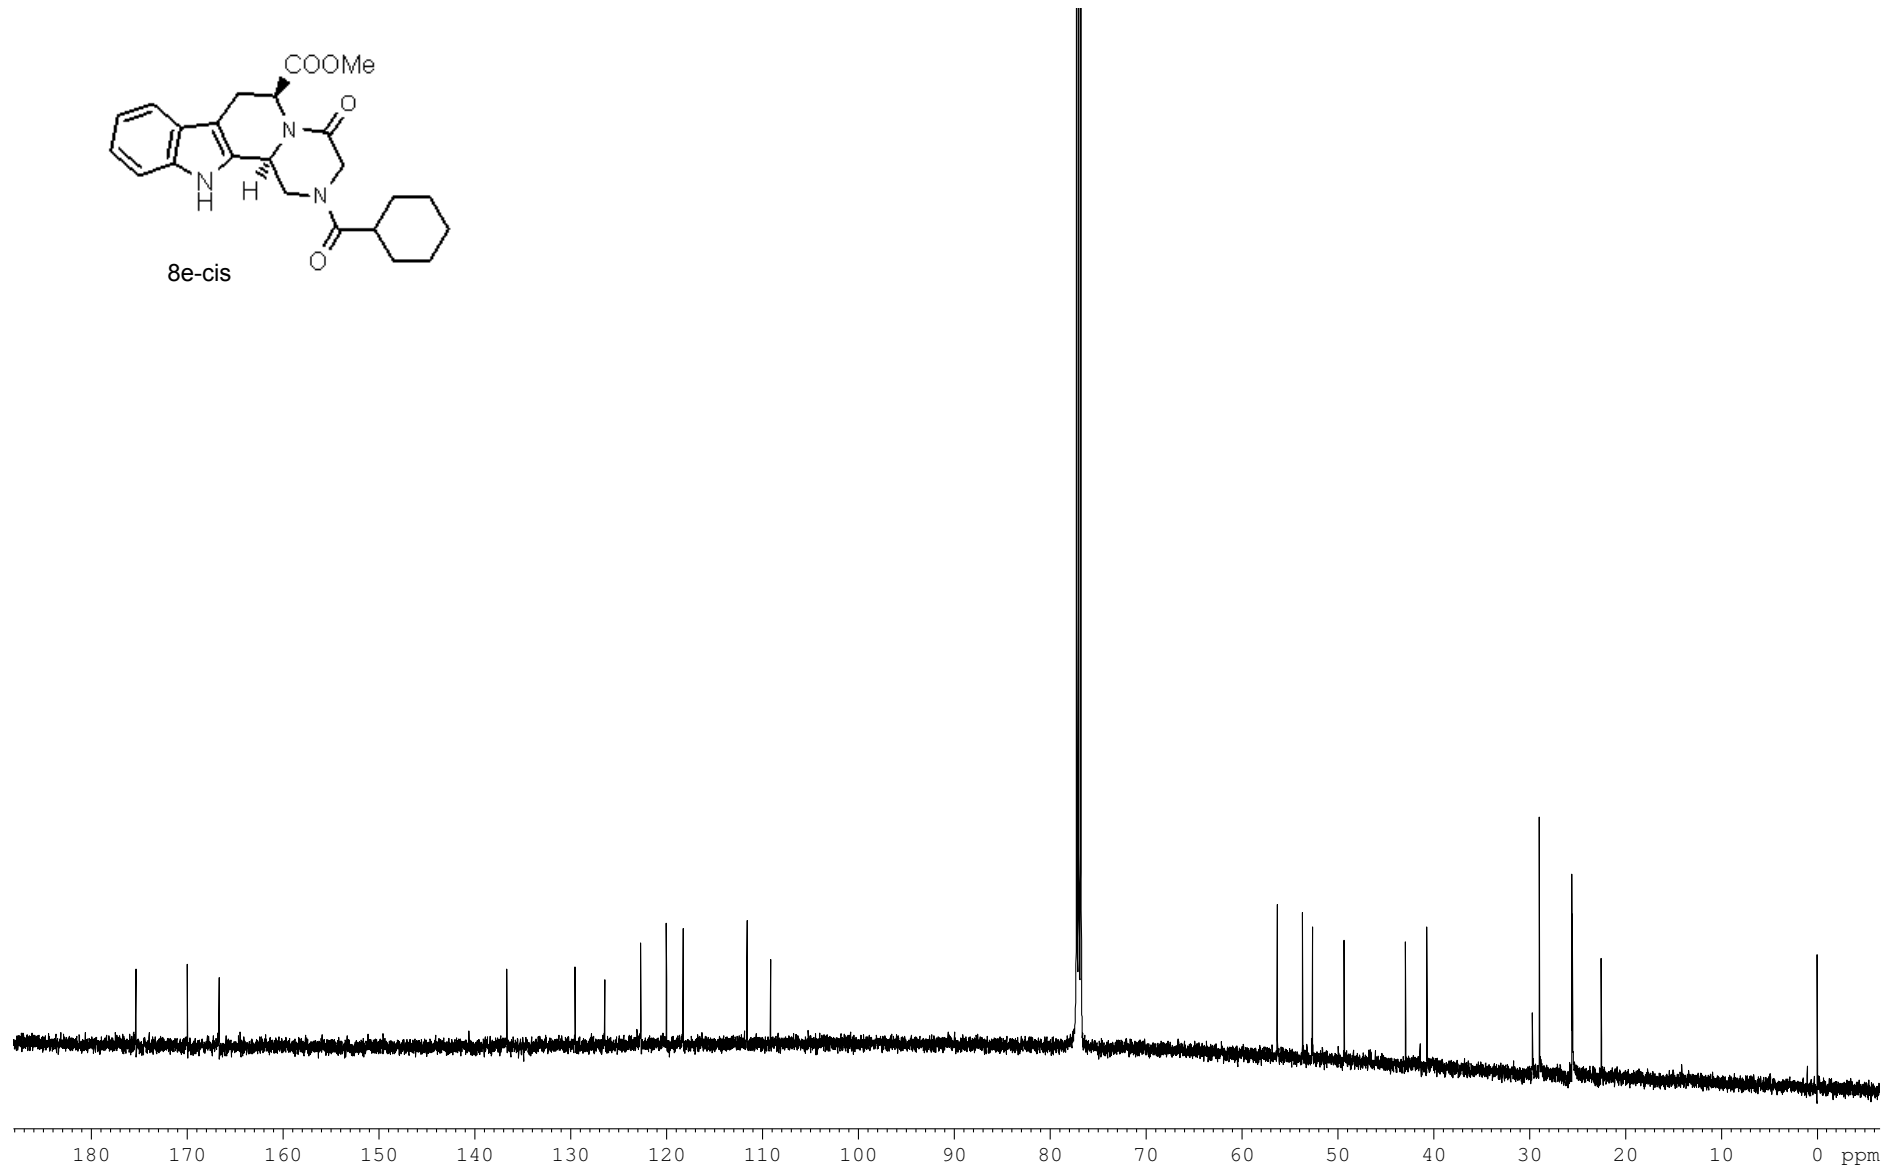

LHX-124a, CDC13, 600 MHz

9.039  
7.556  
7.543  
7.385  
7.372  
7.277  
7.245  
7.233  
7.168  
7.156  
5.990  
5.981  
5.276  
5.254  
5.191  
5.174  
4.622  
4.593  
4.260  
4.230  
3.641  
3.536  
3.510  
3.169  
3.161  
3.143  
3.135  
2.909  
2.889  
2.869  
2.511  
1.815  
1.802  
1.749  
1.718  
1.697  
1.537  
1.519  
1.314  
1.293  
1.270  
0.016

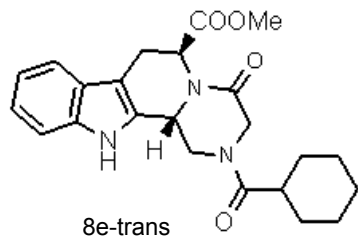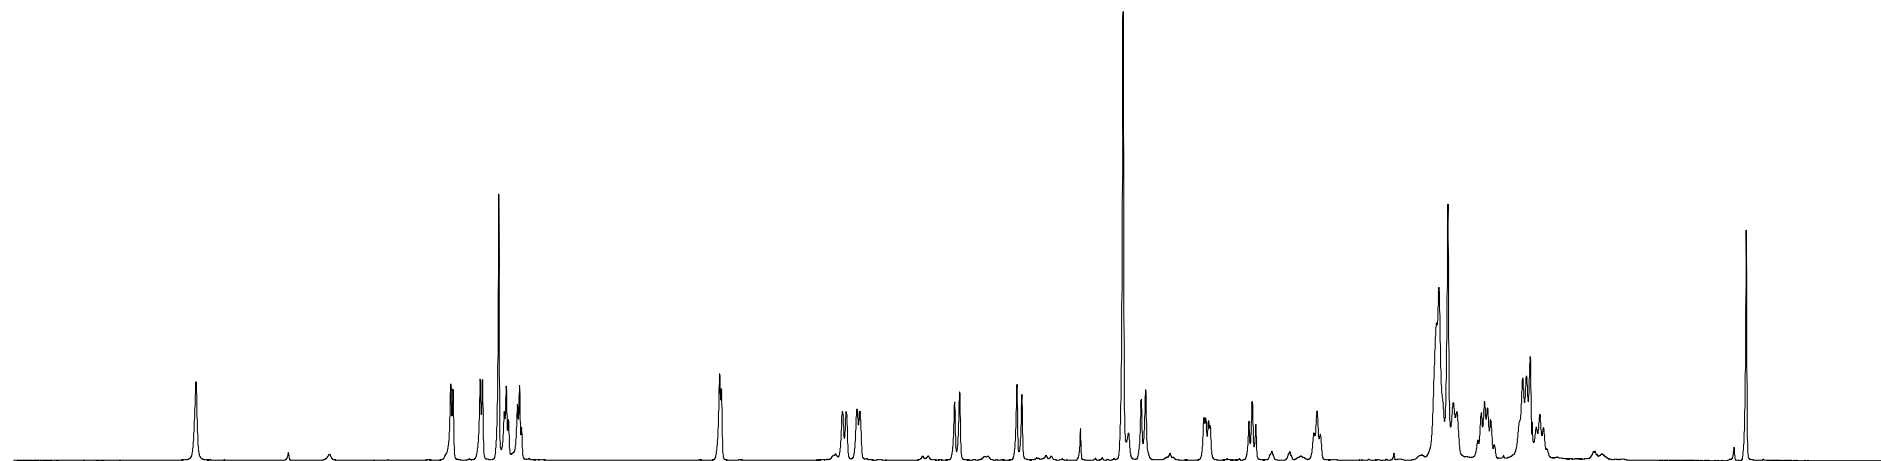

10 9 8 7 6 5 4 3 2 1 0 ppm

1.23  
1.13  
1.06  
0.97  
0.96  
1.04  
1.98  
0.90  
0.99  
2.61  
1.10  
1.09  
1.03  
1.00  
12.68  
SI-28

LHX-124a, CDC13, COSY

— 175.21  
— 170.72  
— 165.18

— 136.74

— 128.26  
— 126.36  
— 122.77  
— 119.91  
— 118.48

— 111.37  
— 107.34

— 52.75  
— 50.86  
— 50.17  
— 49.01  
— 44.37  
— 40.92

— 30.63  
— 29.19  
— 28.95  
— 25.68  
— 25.63  
— 22.86

— 0.00

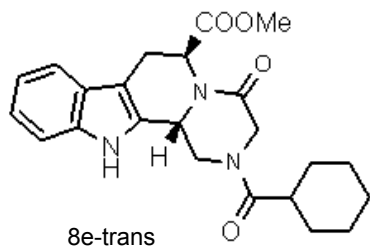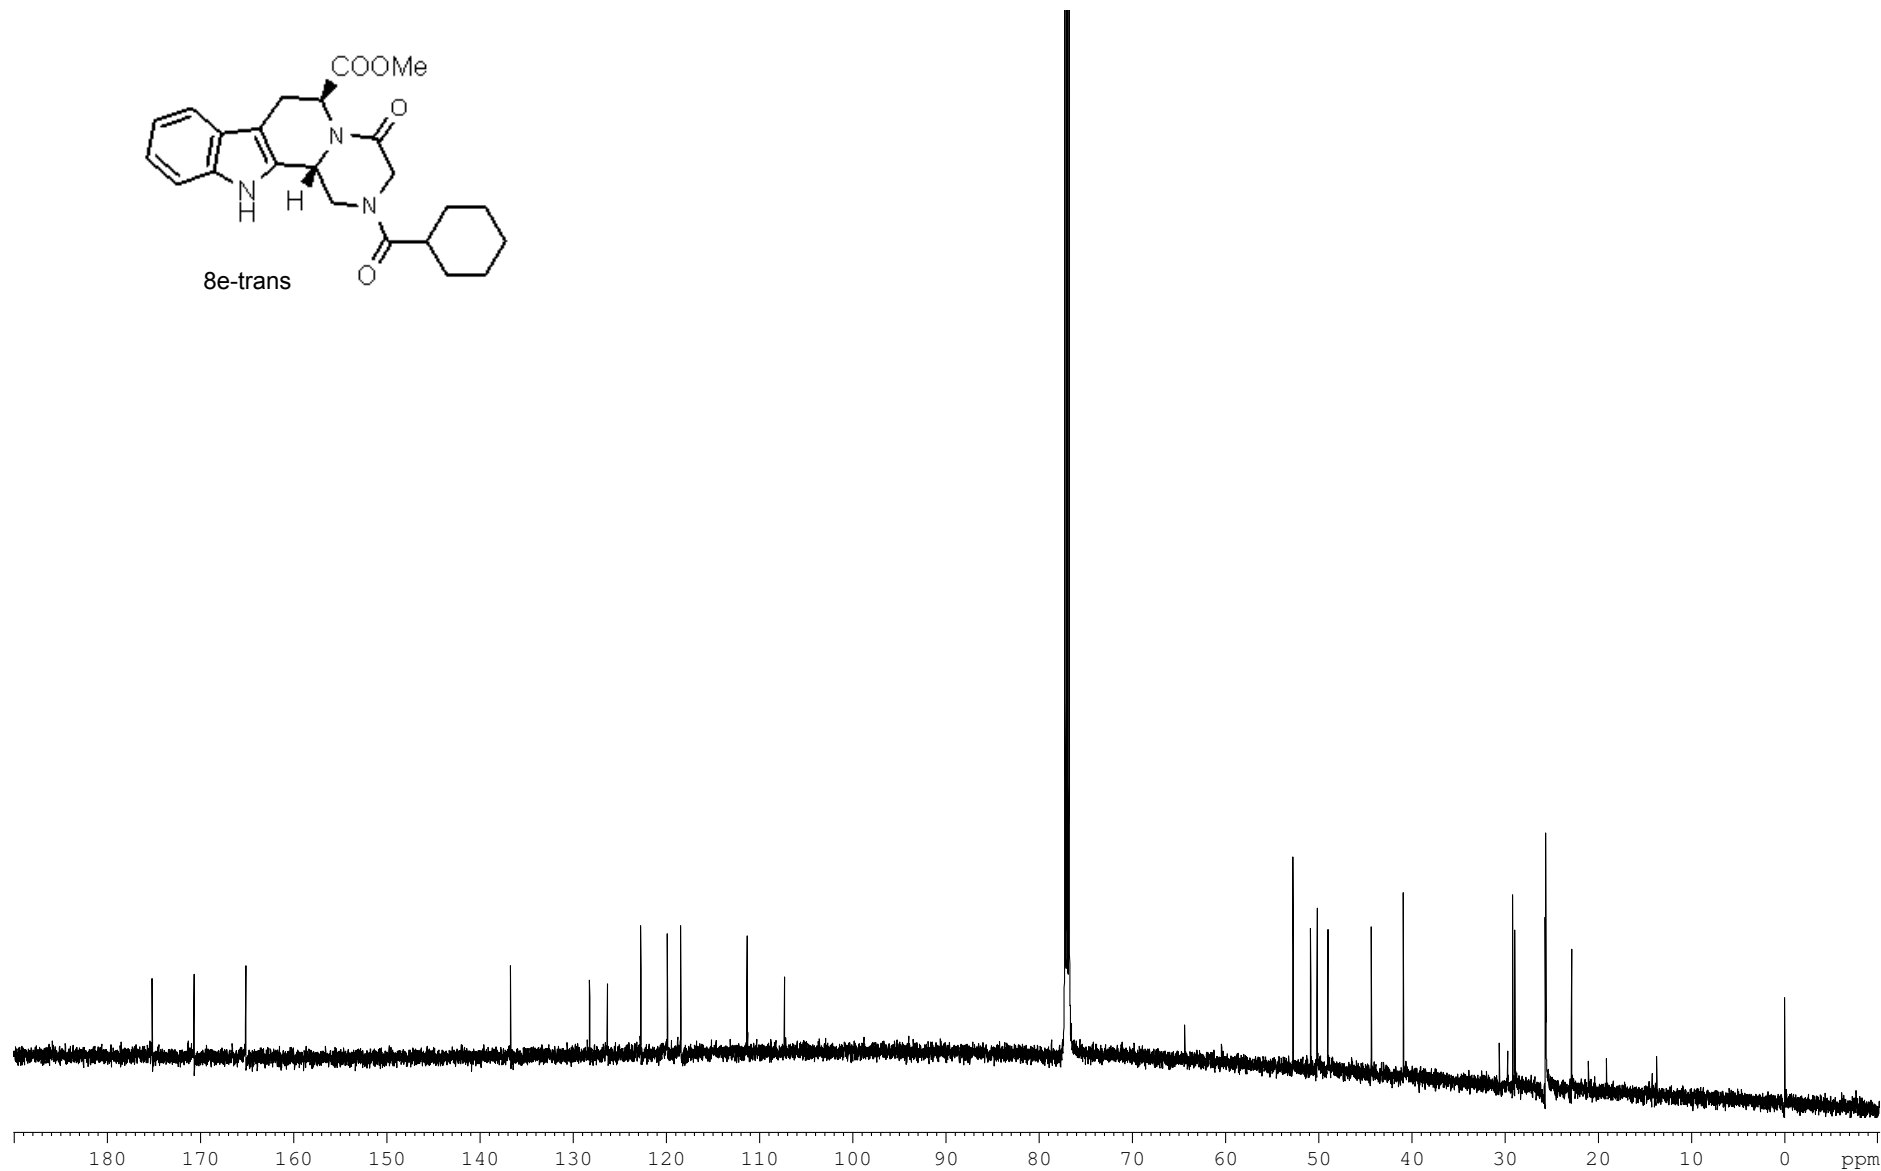

LHX-103, CDC13, 600 MHz

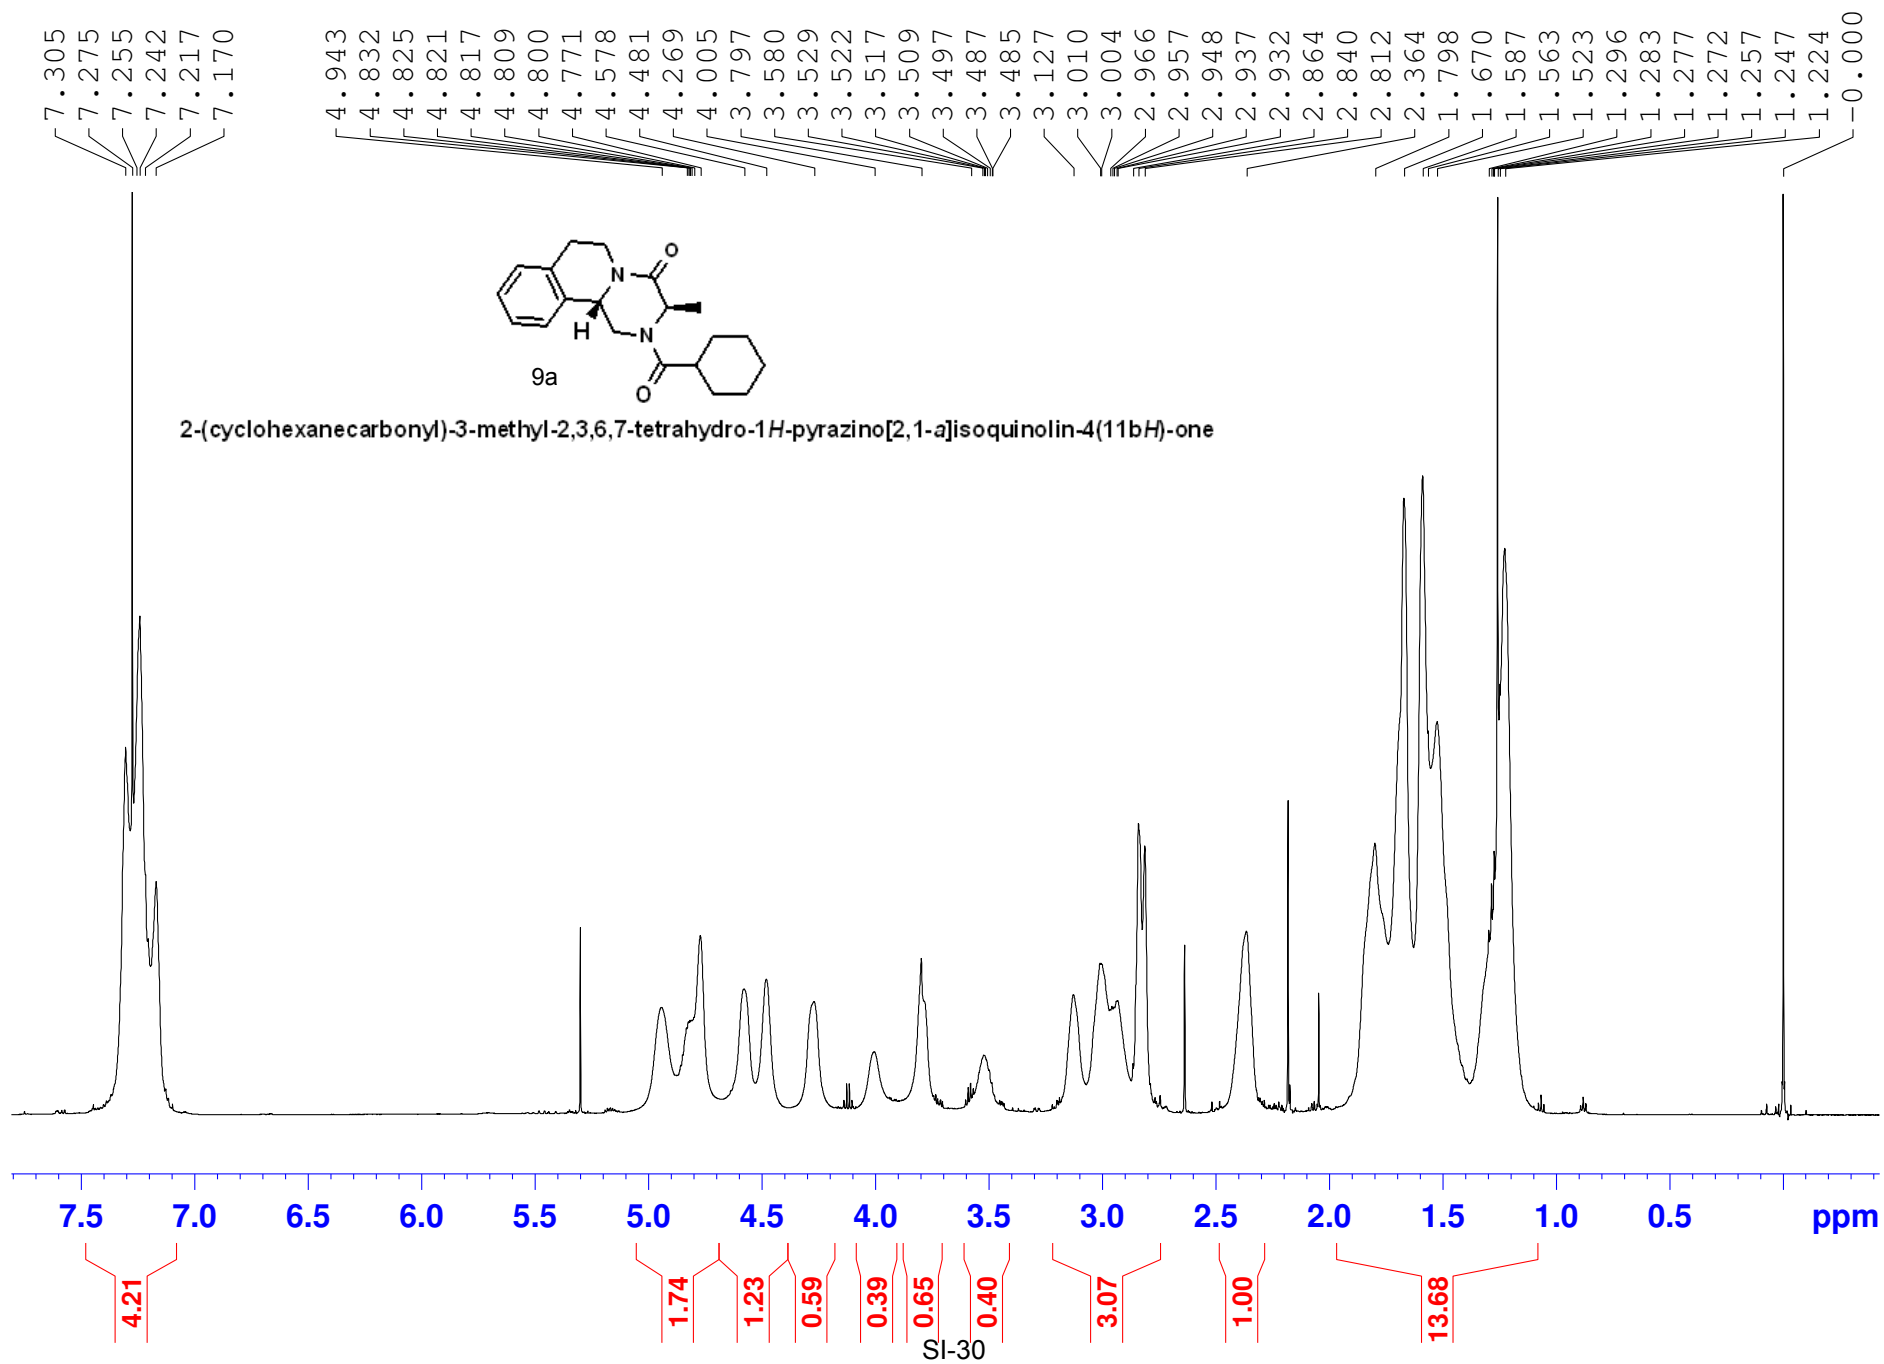

LHX-103, CDCl<sub>3</sub>, 600 MHz

175.36  
174.88  
171.92  
169.94  
168.54

135.86  
135.19  
133.66  
132.26  
129.55  
128.87  
127.77  
126.92  
125.92  
125.01  
118.80  
117.63  
116.78

77.35  
77.18  
76.97

59.95  
59.33  
54.44  
53.98  
52.65  
49.58

41.83  
40.73  
40.43  
38.95

29.92  
29.04  
28.22  
25.61

19.92  
18.66

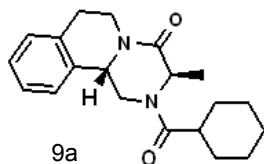

2-(cyclohexanecarbonyl)-3-methyl-2,3,6,7-tetrahydro-1H-pyrazino[2,1-a]isoquinolin-4(11bH)-one

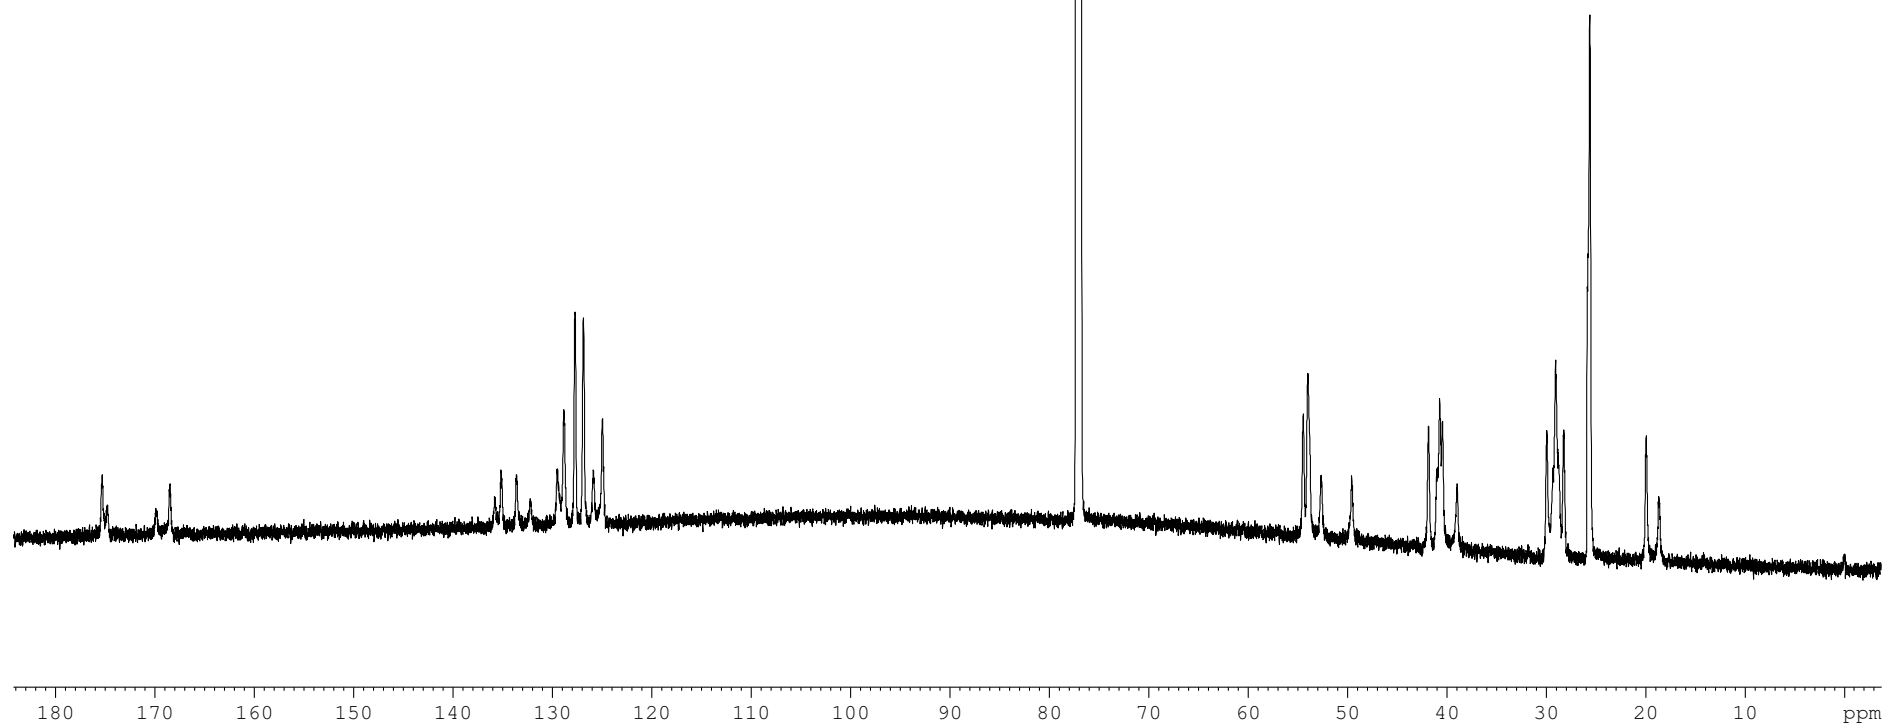

LHX\_74, CDCl<sub>3</sub>, 600 MHz

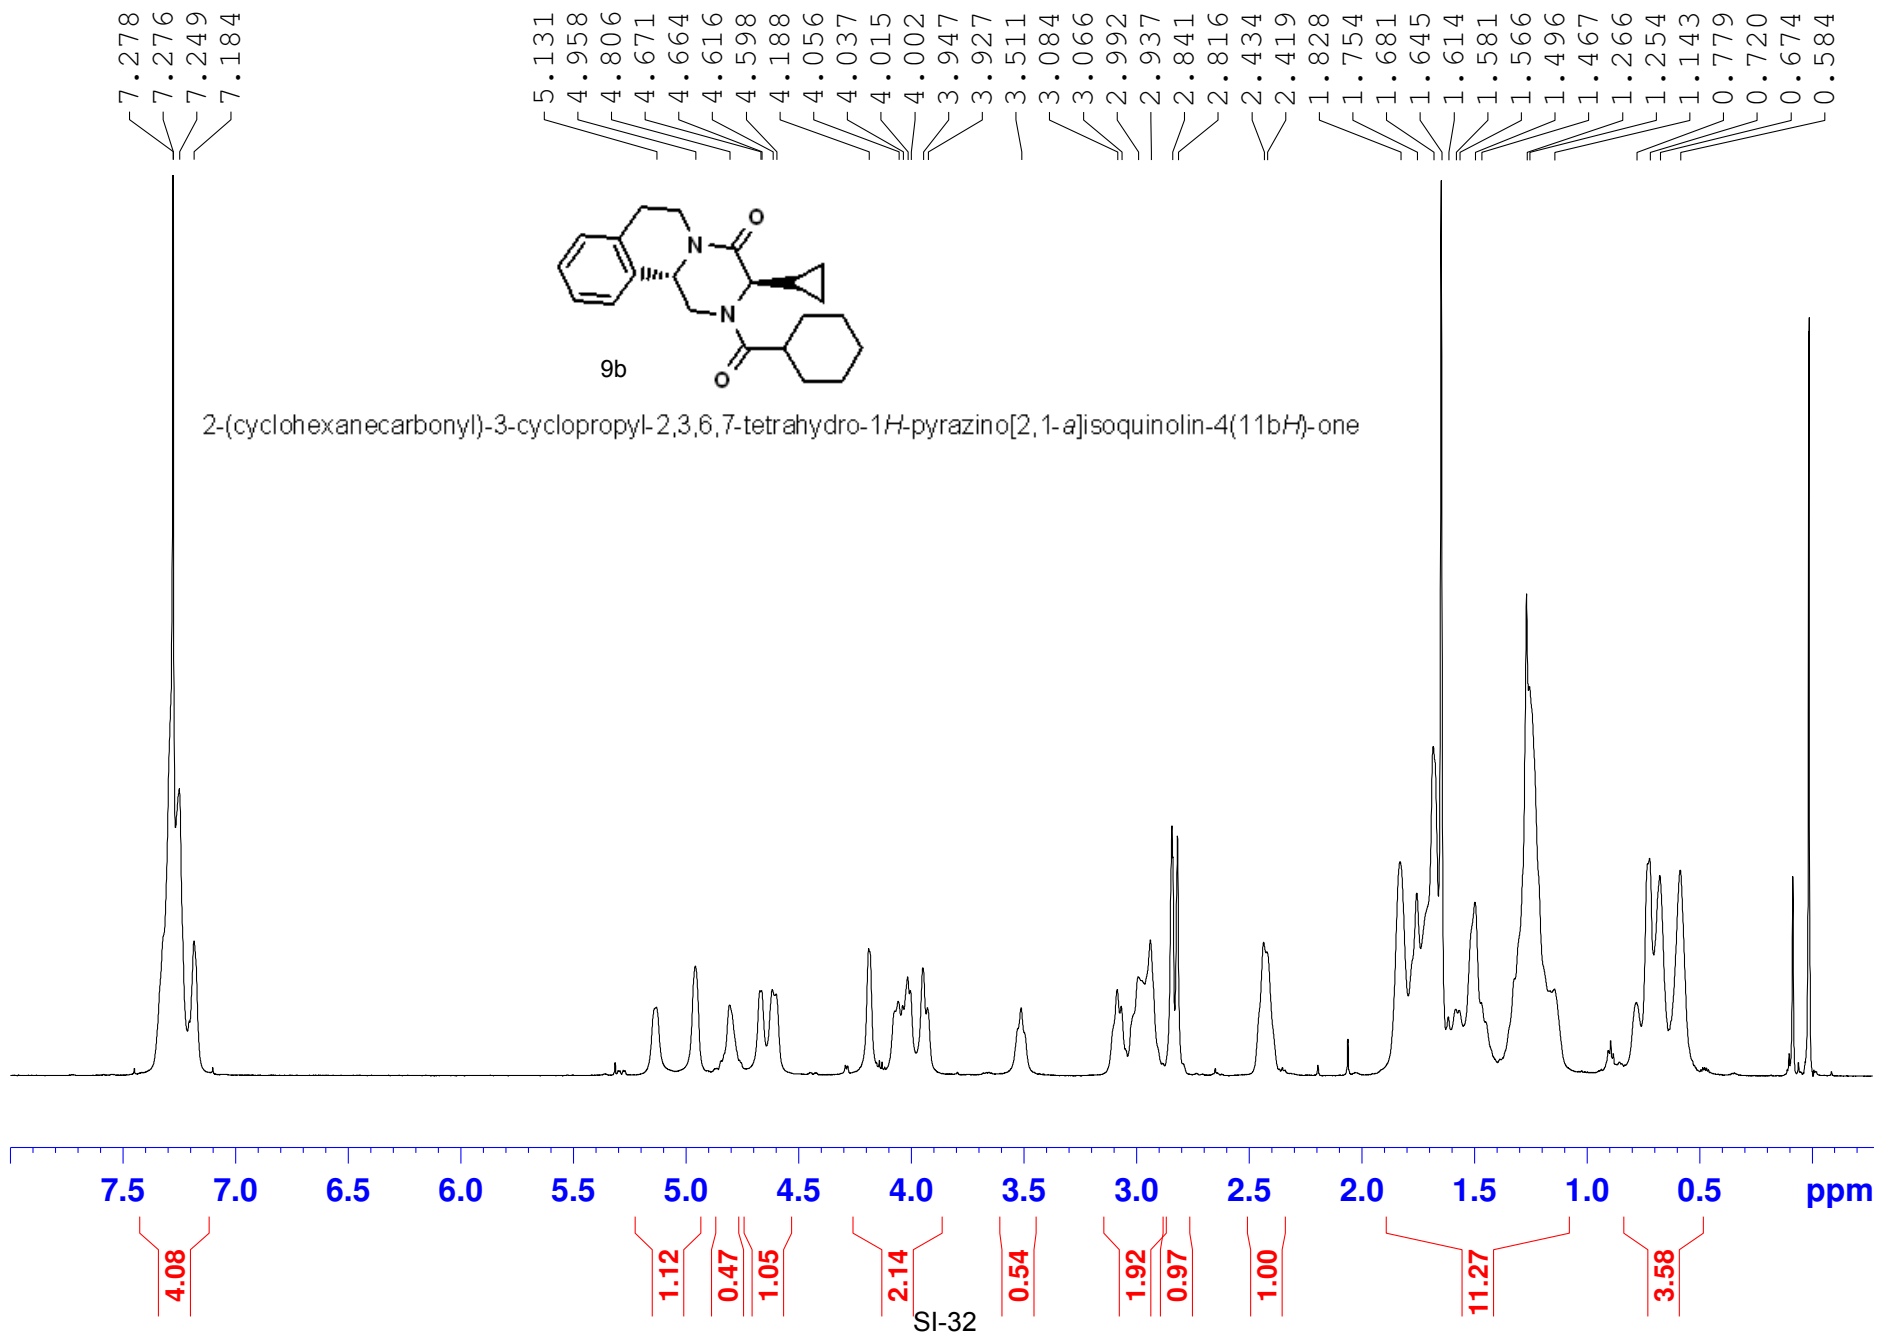



LHX-74, CDCl<sub>3</sub>, NMR600

175.82  
175.35  
168.37  
167.30

135.82  
135.08  
133.19  
132.31  
129.48  
129.34  
128.87  
127.77  
127.62  
126.88  
126.06  
125.50  
125.21

77.22  
77.01  
76.80

61.08  
58.91  
53.30  
53.17  
50.22  
44.87  
41.09  
40.60  
39.74  
38.65  
29.80  
29.69  
29.57  
29.26  
29.03  
28.64  
28.41  
25.85  
25.58  
14.80  
14.62  
4.46  
4.00  
3.60  
3.34  
-0.01

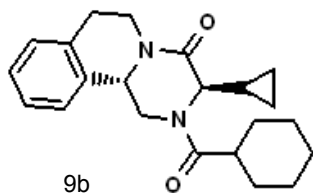

2-(cyclohexanecarbonyl)-3-cyclopropyl-2,3,6,7-tetrahydro-1H-pyrazino[2,1-a]isoquinolin-4(11bH)-one

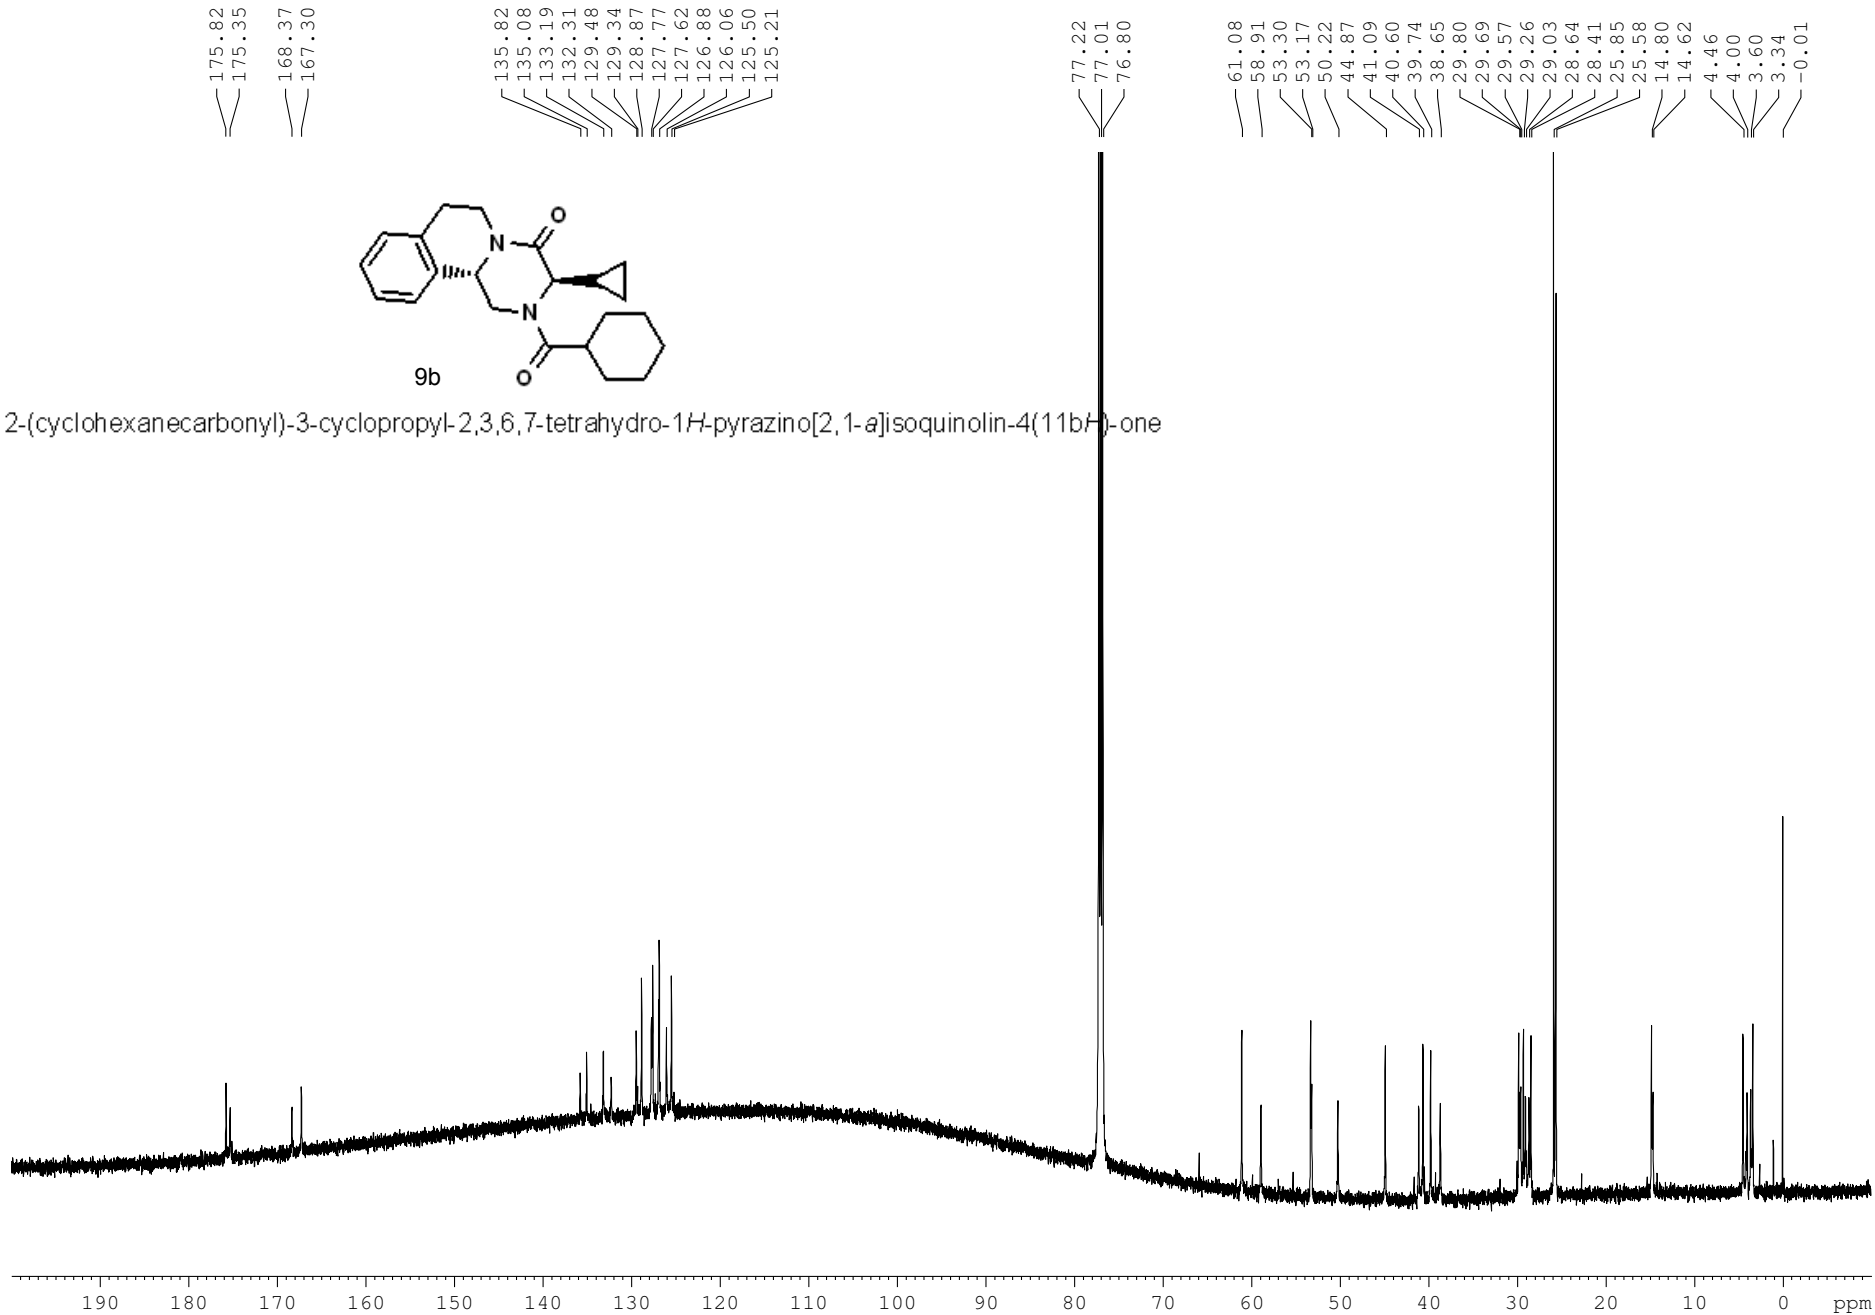

LX-128, CDCl<sub>3</sub>, 600 MHz

7.306  
7.295  
7.277  
7.252  
7.242  
7.235  
7.230  
7.168  
4.896  
4.891  
4.883  
4.867  
4.851  
4.643  
4.623  
4.163  
4.149  
4.114  
4.099  
3.742  
3.734  
3.719  
3.710  
3.509  
3.020  
2.877  
2.813  
2.789  
2.438  
1.809  
1.790  
1.747  
1.725  
1.689  
1.675  
1.493  
1.480  
1.475  
1.279  
1.267  
1.260  
1.256  
1.243  
1.226  
1.211  
1.198  
1.186  
1.175  
1.135  
1.124  
1.087  
1.076  
1.044  
1.033  
0.007

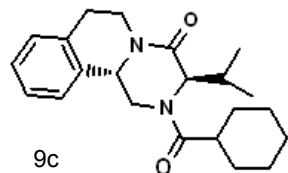

2-(cyclohexanecarbonyl)-3-isopropyl-2,3,6,7-tetrahydro-1H-pyrazino[2,1-a]isoquinolin-4(11bH)-one

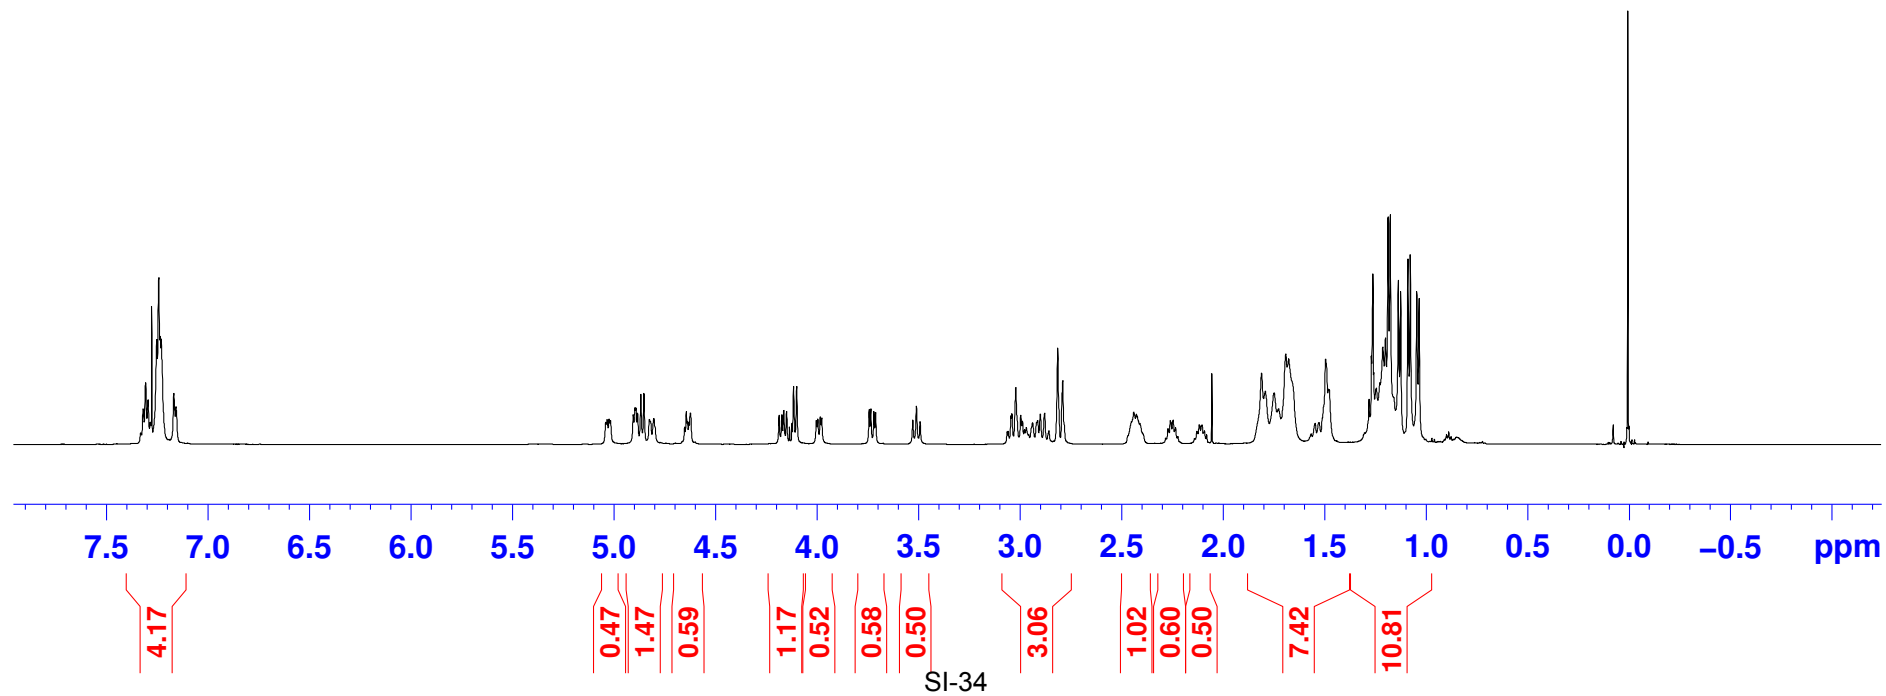

LX-128, CDCl<sub>3</sub>, 600 MHz

176.13  
175.71  
168.68  
167.93

135.81  
135.00  
133.44  
132.49  
129.51  
128.92  
127.76  
127.56  
126.93  
126.83  
125.98  
125.42

77.26  
77.05  
76.83

64.62  
61.00  
53.24  
53.01  
50.21  
44.72  
41.12  
40.70  
39.83  
38.62  
32.19  
31.63  
29.99  
29.92  
29.71  
29.06  
28.50  
28.42  
26.00  
25.69  
25.62  
25.47  
20.21  
20.05  
19.85

0.00

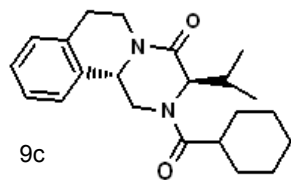

2-(cyclohexanecarbonyl)-3-isopropyl-2,3,6,7-tetrahydro-1H-pyrazino[2,1-a]isoquinolin-4(11bH)-one

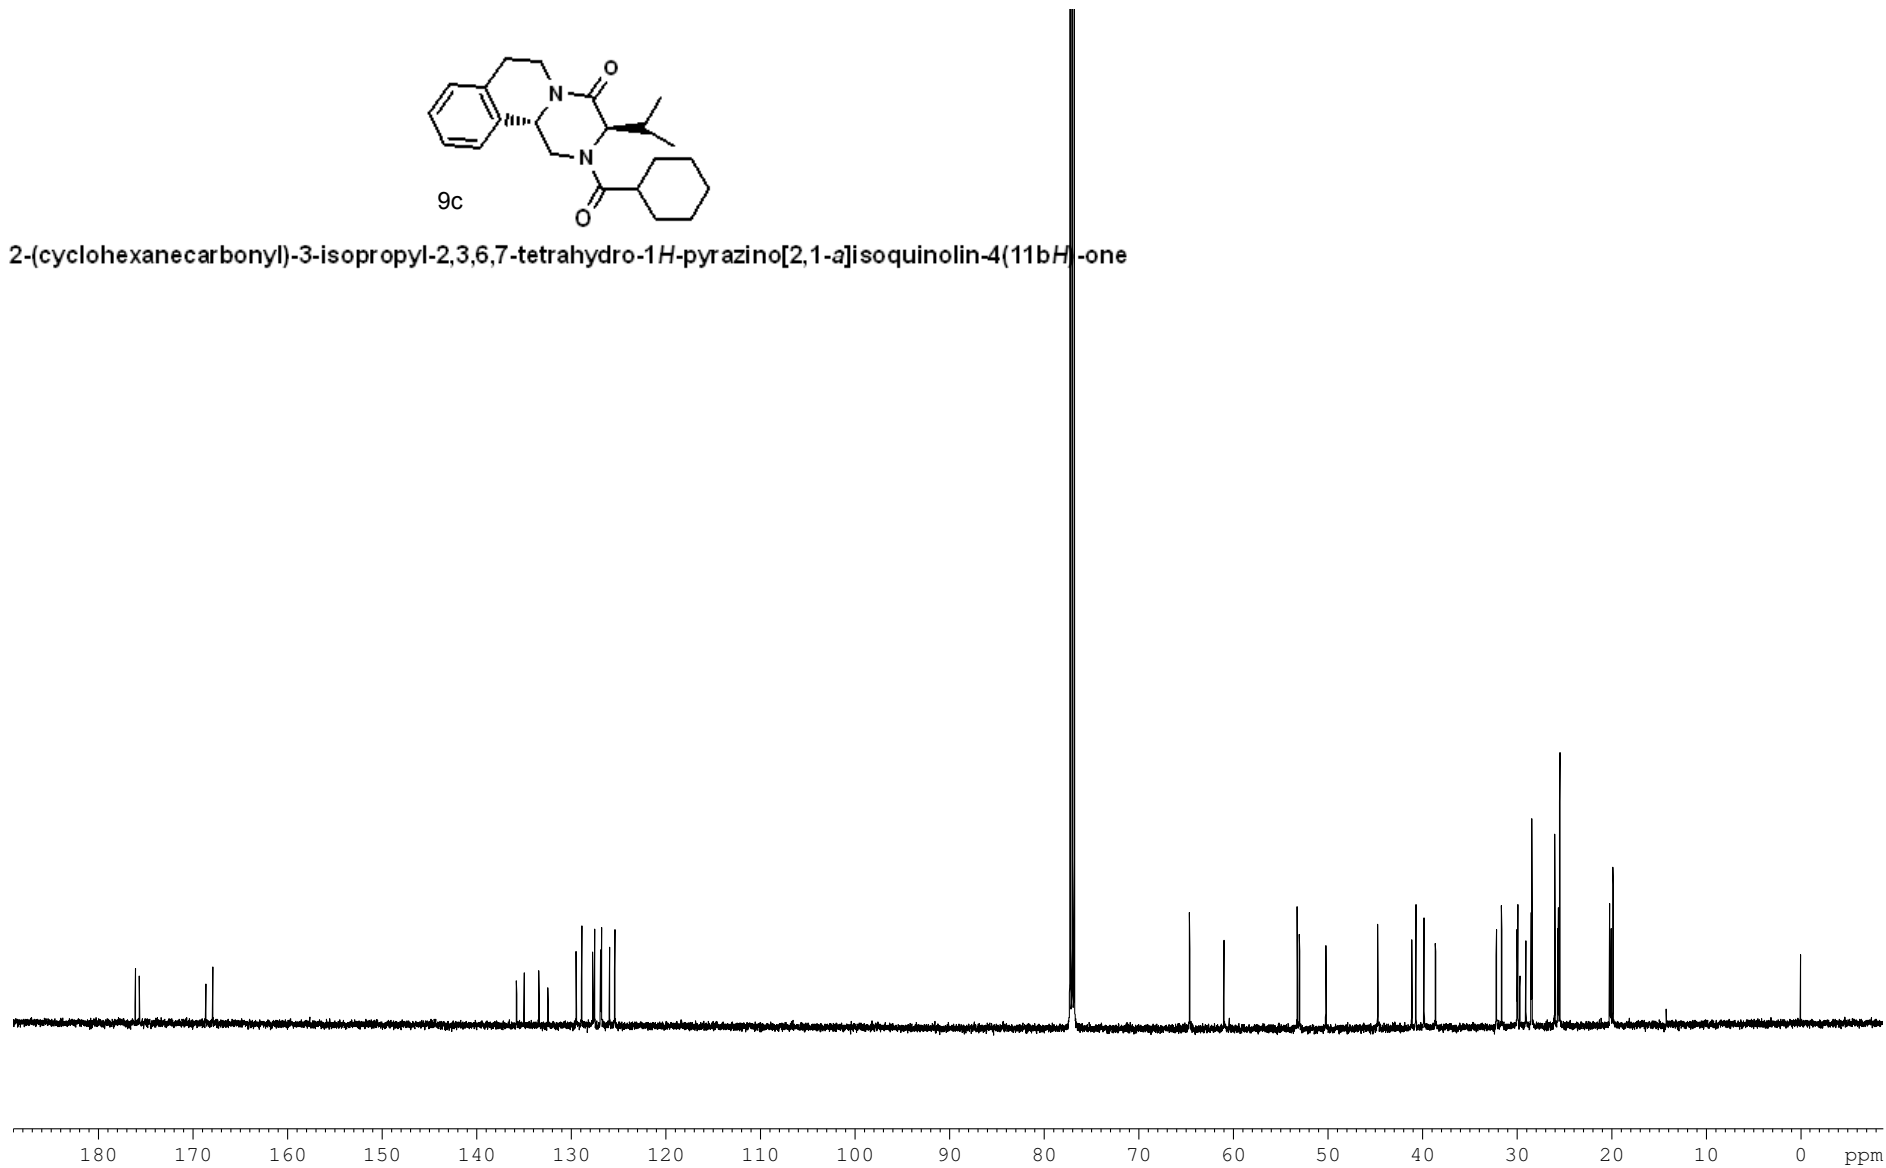

LX-106, CDCl<sub>3</sub>, 600 MHz

7.310  
7.299  
7.293  
7.284  
7.267  
7.249  
7.237  
7.231  
7.221  
7.208  
7.157  
7.147  
5.055  
4.831  
4.631  
4.611  
4.441  
4.429  
4.416  
4.144  
4.133  
4.121  
3.806  
3.799  
3.782  
3.775  
3.577  
3.574  
3.046  
3.031  
3.026  
2.994  
2.871  
2.815  
2.808  
2.800  
2.388  
2.383  
1.807  
1.708  
1.697  
1.677  
1.673  
1.665  
1.652  
1.453  
1.449  
1.254  
1.213  
1.084  
1.073  
1.067  
1.003  
0.992  
-0.000

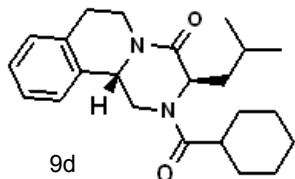

2-(cyclohexanecarbonyl)-3-isobutyl-2,3,6,7-tetrahydro-1H-pyrazino[2,1-a]isoquinolin-4(11bH)-one

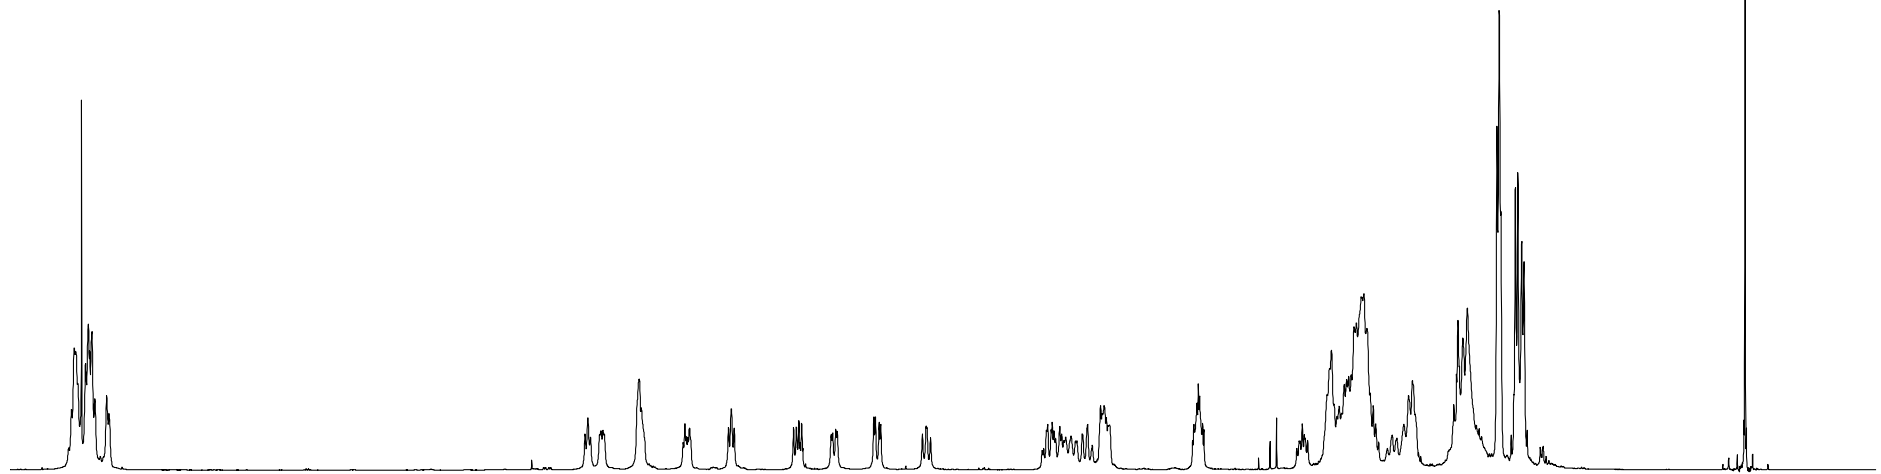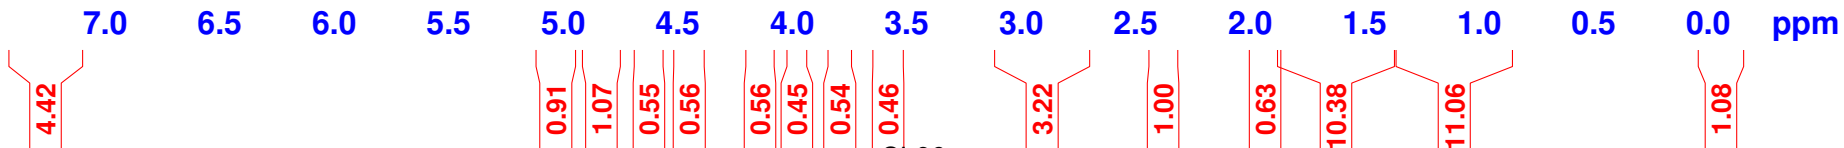

SI-36

LX-106, CDCl<sub>3</sub>, 600 MHz

175.45  
174.98  
169.18  
168.09

135.96  
135.15  
133.39  
132.44  
129.56  
128.86  
127.77  
127.61  
126.90  
126.81  
125.90  
125.44

77.24  
77.03  
76.82

57.24  
54.68  
53.79  
53.61  
49.28  
43.43  
43.40  
42.22  
41.04  
40.63  
40.09  
38.97  
29.97  
29.70  
29.60  
29.04  
28.97  
28.82  
28.60  
28.40  
25.95  
25.92  
25.68  
25.60  
25.02  
24.64  
23.12  
22.42  
22.21  
22.09  
-0.00

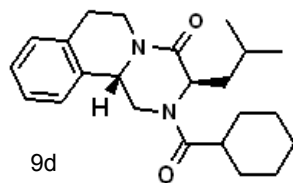

2-(cyclohexanecarbonyl)-3-isobutyl-2,3,6,7-tetrahydro-1H-pyrazino[2,1-a]isoquinolin-4(11bH)-one

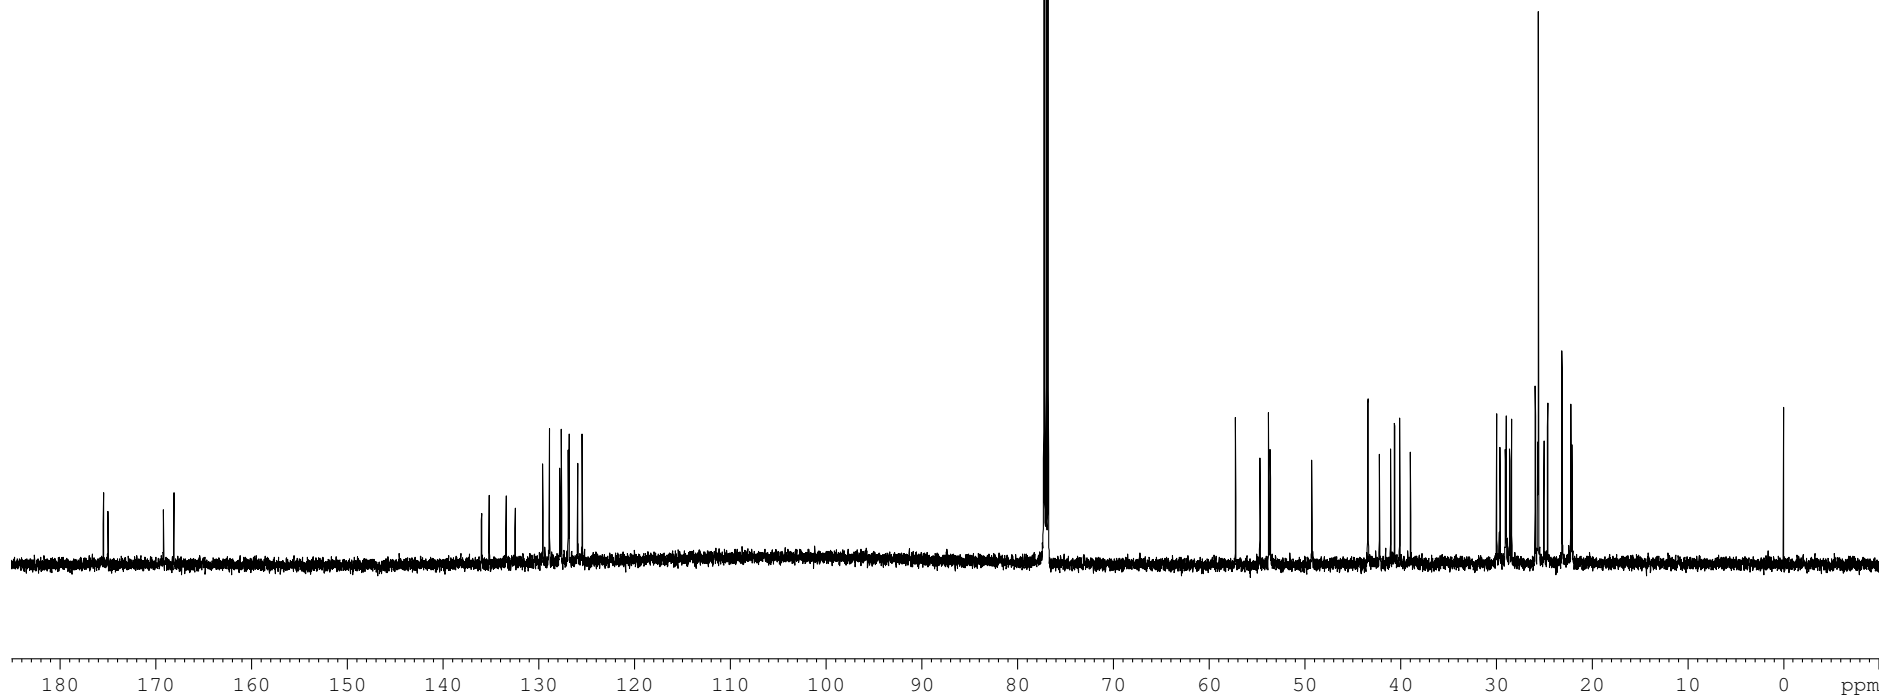

LHX-123, CDCl<sub>3</sub>, 600 MHz

7.322  
7.310  
7.299  
7.287  
7.266  
7.254  
7.221  
7.209  
7.174  
5.314  
5.296  
5.285  
5.274  
5.043  
5.038  
4.034  
4.026  
4.013  
4.005  
3.761  
3.747  
3.740  
3.726  
2.985  
2.964  
2.872  
2.867  
2.811  
2.786  
2.760  
2.359  
1.811  
1.799  
1.788  
1.771  
1.760  
1.736  
1.729  
1.697  
1.678  
1.662  
1.646  
1.462  
1.441  
1.285  
1.266  
1.258  
1.252  
1.231  
1.218  
1.198  
1.073  
1.061  
1.031  
0.012

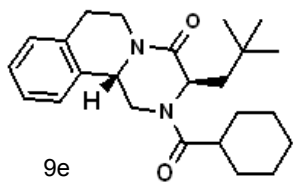

2-(cyclohexanecarbonyl)-3-neopentyl-2,3,6,7-tetrahydro-1H-pyrazino[2,1-a]isoquinolin-4(11bH)-one

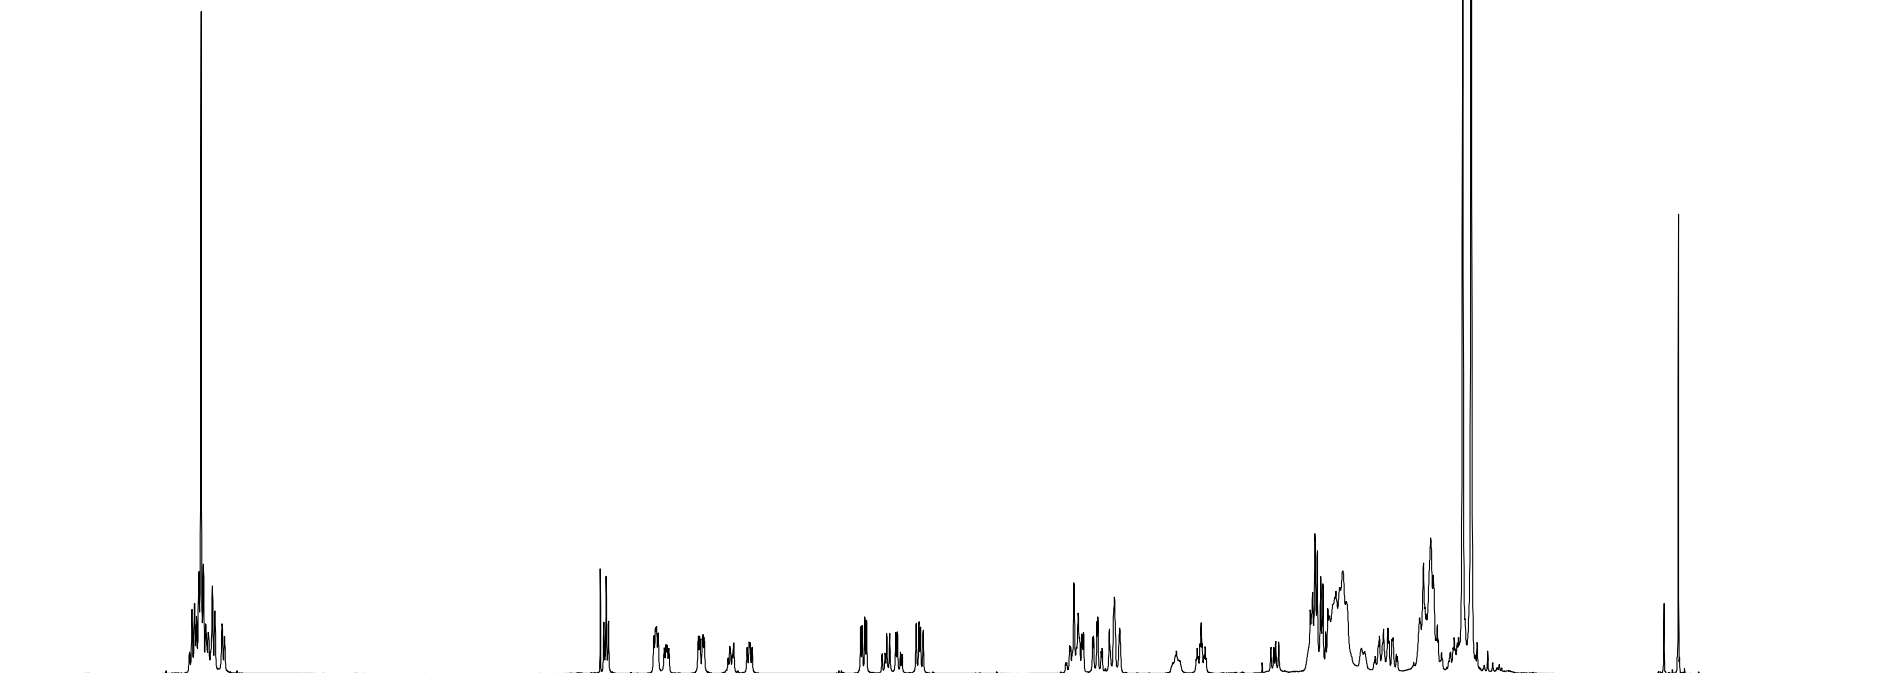

8.0 7.5 7.0 6.5 6.0 5.5 5.0 4.5 4.0 3.5 3.0 2.5 2.0 1.5 1.0 0.5 0.0 ppm

4.37

0.56  
0.57  
0.39  
0.61  
0.40  
0.40

2.11

SI-38

3.00  
0.40  
0.62  
0.47  
7.10  
1.35  
3.88  
8.73

LHX-123, CDCl<sub>3</sub>, 600 MHz

175.24  
174.61  
170.20  
169.08

136.06  
135.09  
133.06  
132.73  
129.66  
128.90  
127.75  
127.56  
126.87  
126.80  
125.98  
125.80

77.24  
77.03  
76.82

57.10  
53.75  
53.50  
53.15  
48.14  
47.79  
46.30  
45.67  
40.95  
40.89  
39.57  
39.37  
30.94  
30.86  
29.99  
29.70  
29.52  
29.38  
29.06  
28.83  
28.69  
28.56  
26.03  
25.95  
25.66  
25.63  
25.56

0.00

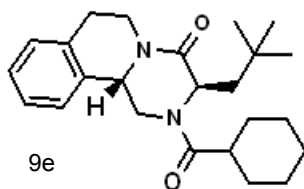

2-(cyclohexanecarbonyl)-3-neopentyl-2,3,6,7-tetrahydro-1H-pyrazino[2,1-a]isoquinolin-4(11bH)-one

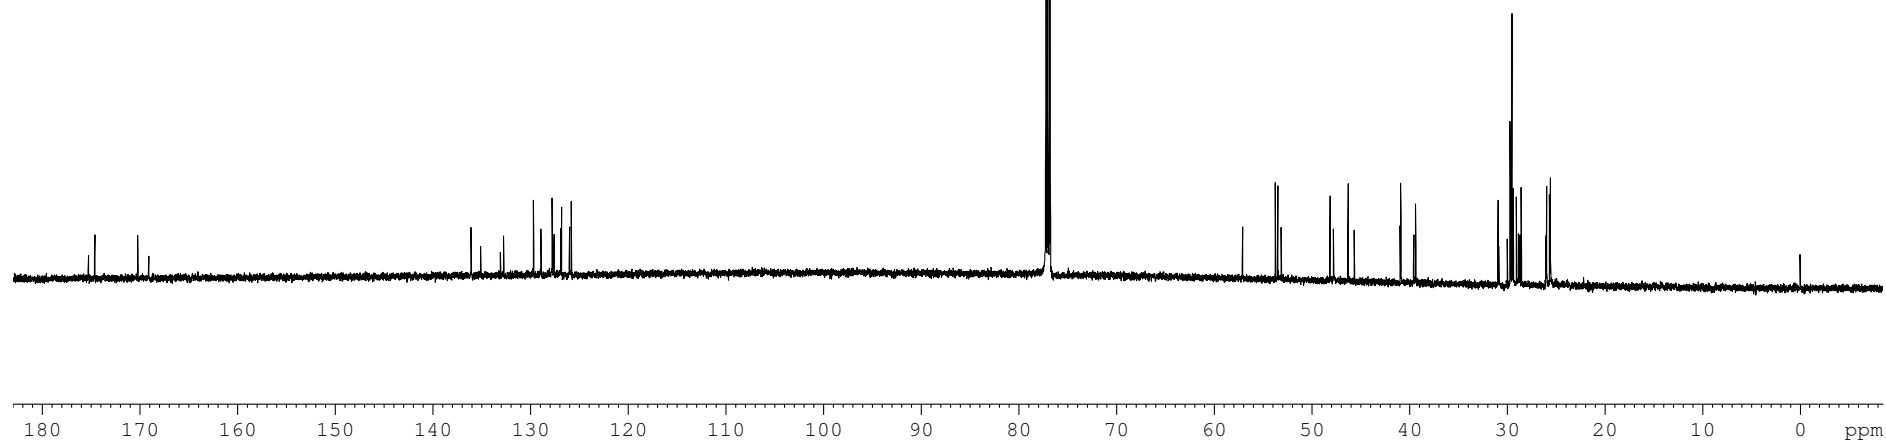

LHX-127, CDCl<sub>3</sub>, 600 MHz

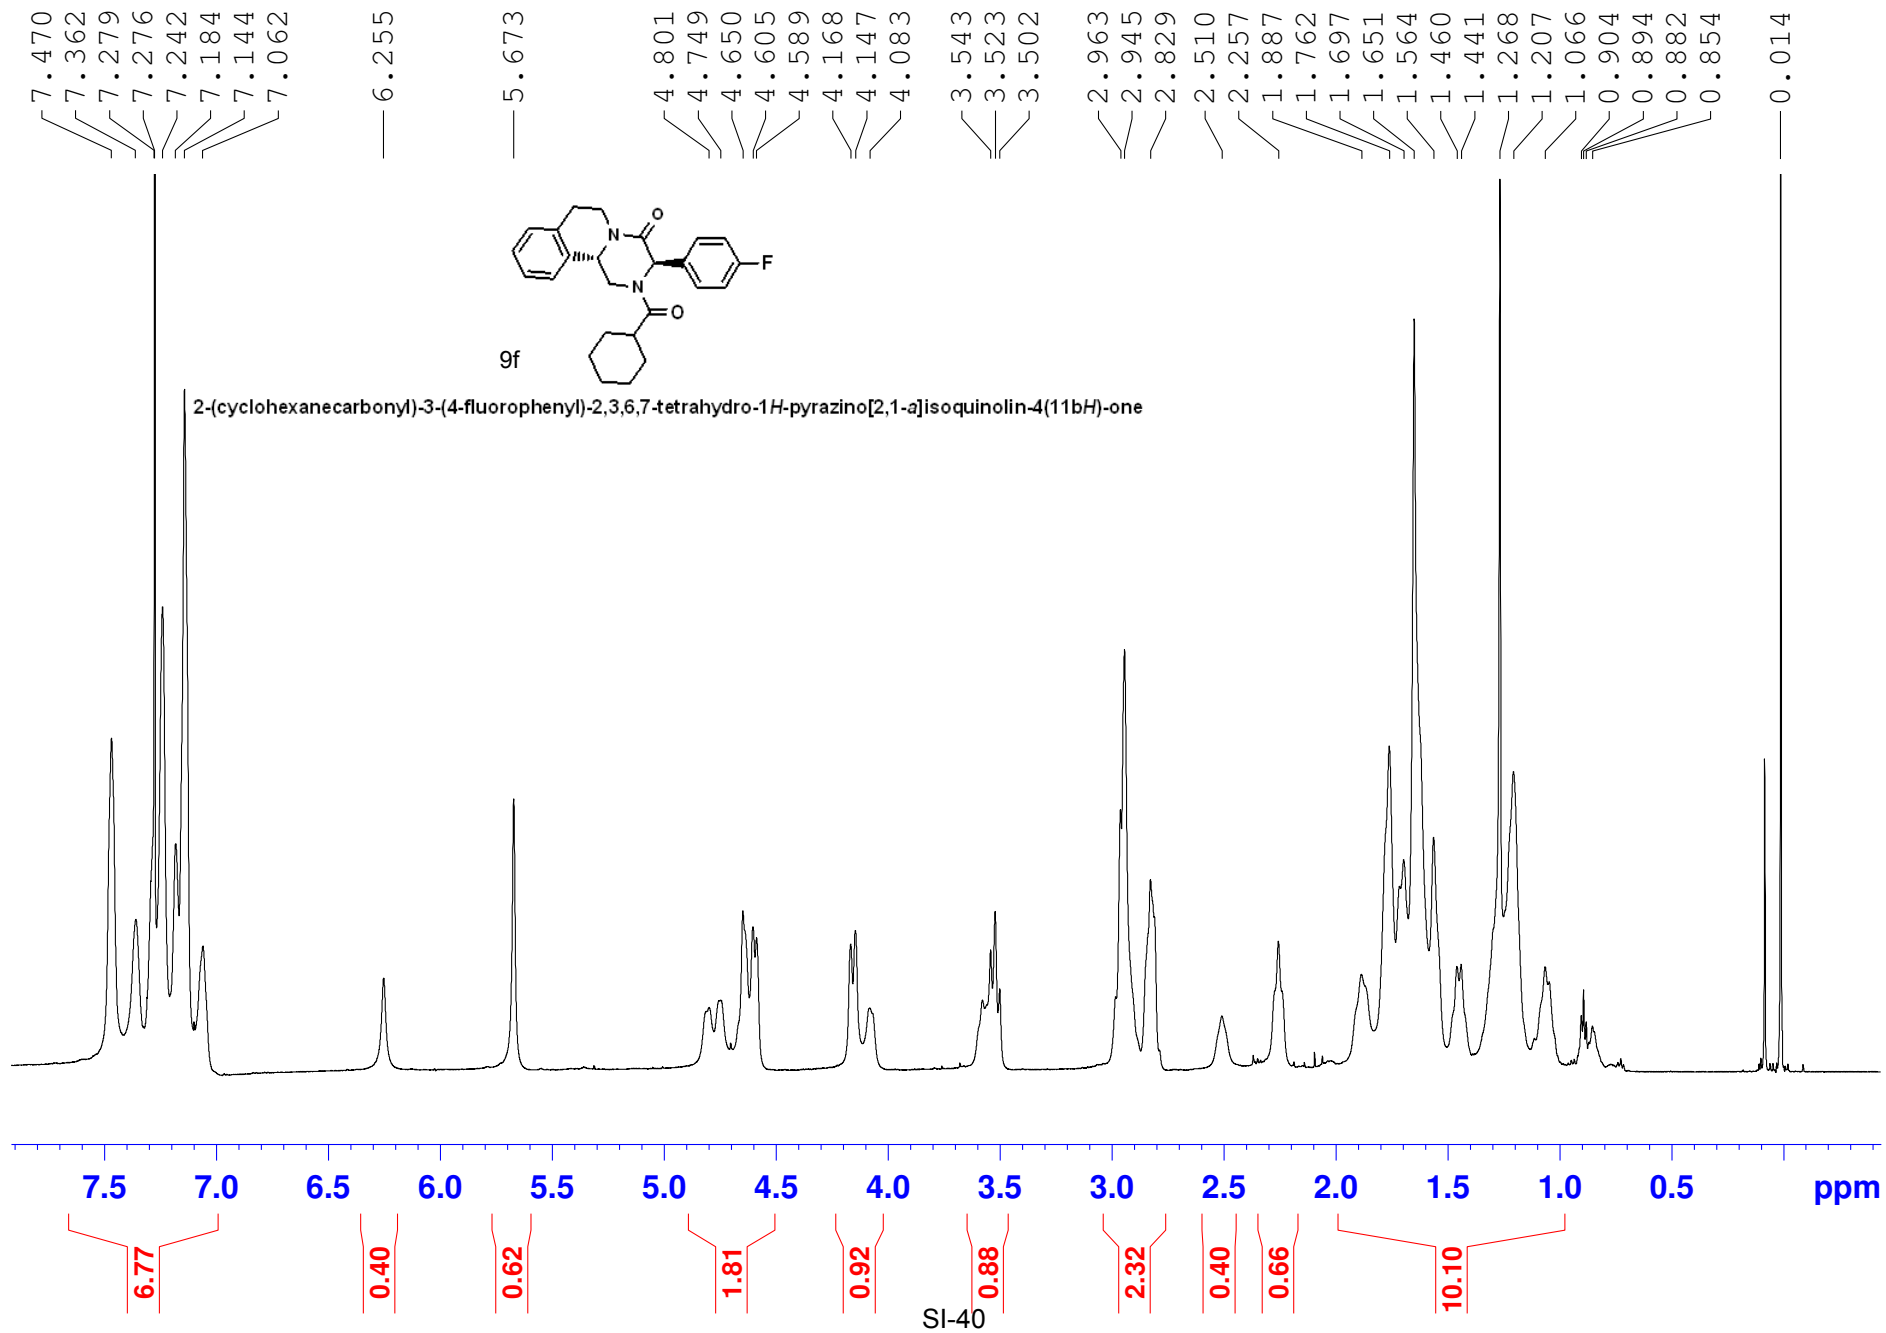



LHX-127, CDCl<sub>3</sub>, 600 MHz

176.61  
175.54  
167.45  
166.78  
163.55  
163.17  
161.91  
135.58  
134.85  
132.06  
131.84  
129.41  
128.96  
127.91  
127.70  
127.39  
127.24  
127.24  
127.18  
127.03  
126.20  
122.35  
120.67  
119.64  
118.24  
116.32  
116.17  
115.89  
115.74  
114.84  
112.57  
110.86  
108.61  
106.98  
104.73  
77.25  
77.03  
76.82  
61.72  
58.51  
52.66  
51.87  
50.95  
49.03  
41.16  
38.95  
29.94  
29.71  
29.06  
28.73  
28.61  
25.75  
25.53  
25.34

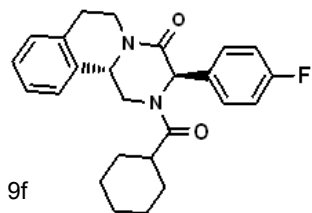

2-(cyclohexanecarbonyl)-3-(4-fluorophenyl)-2,3,6,7-tetrahydro-1H-pyrazino[2,1-a]isoquinolin-4(11bH)-one

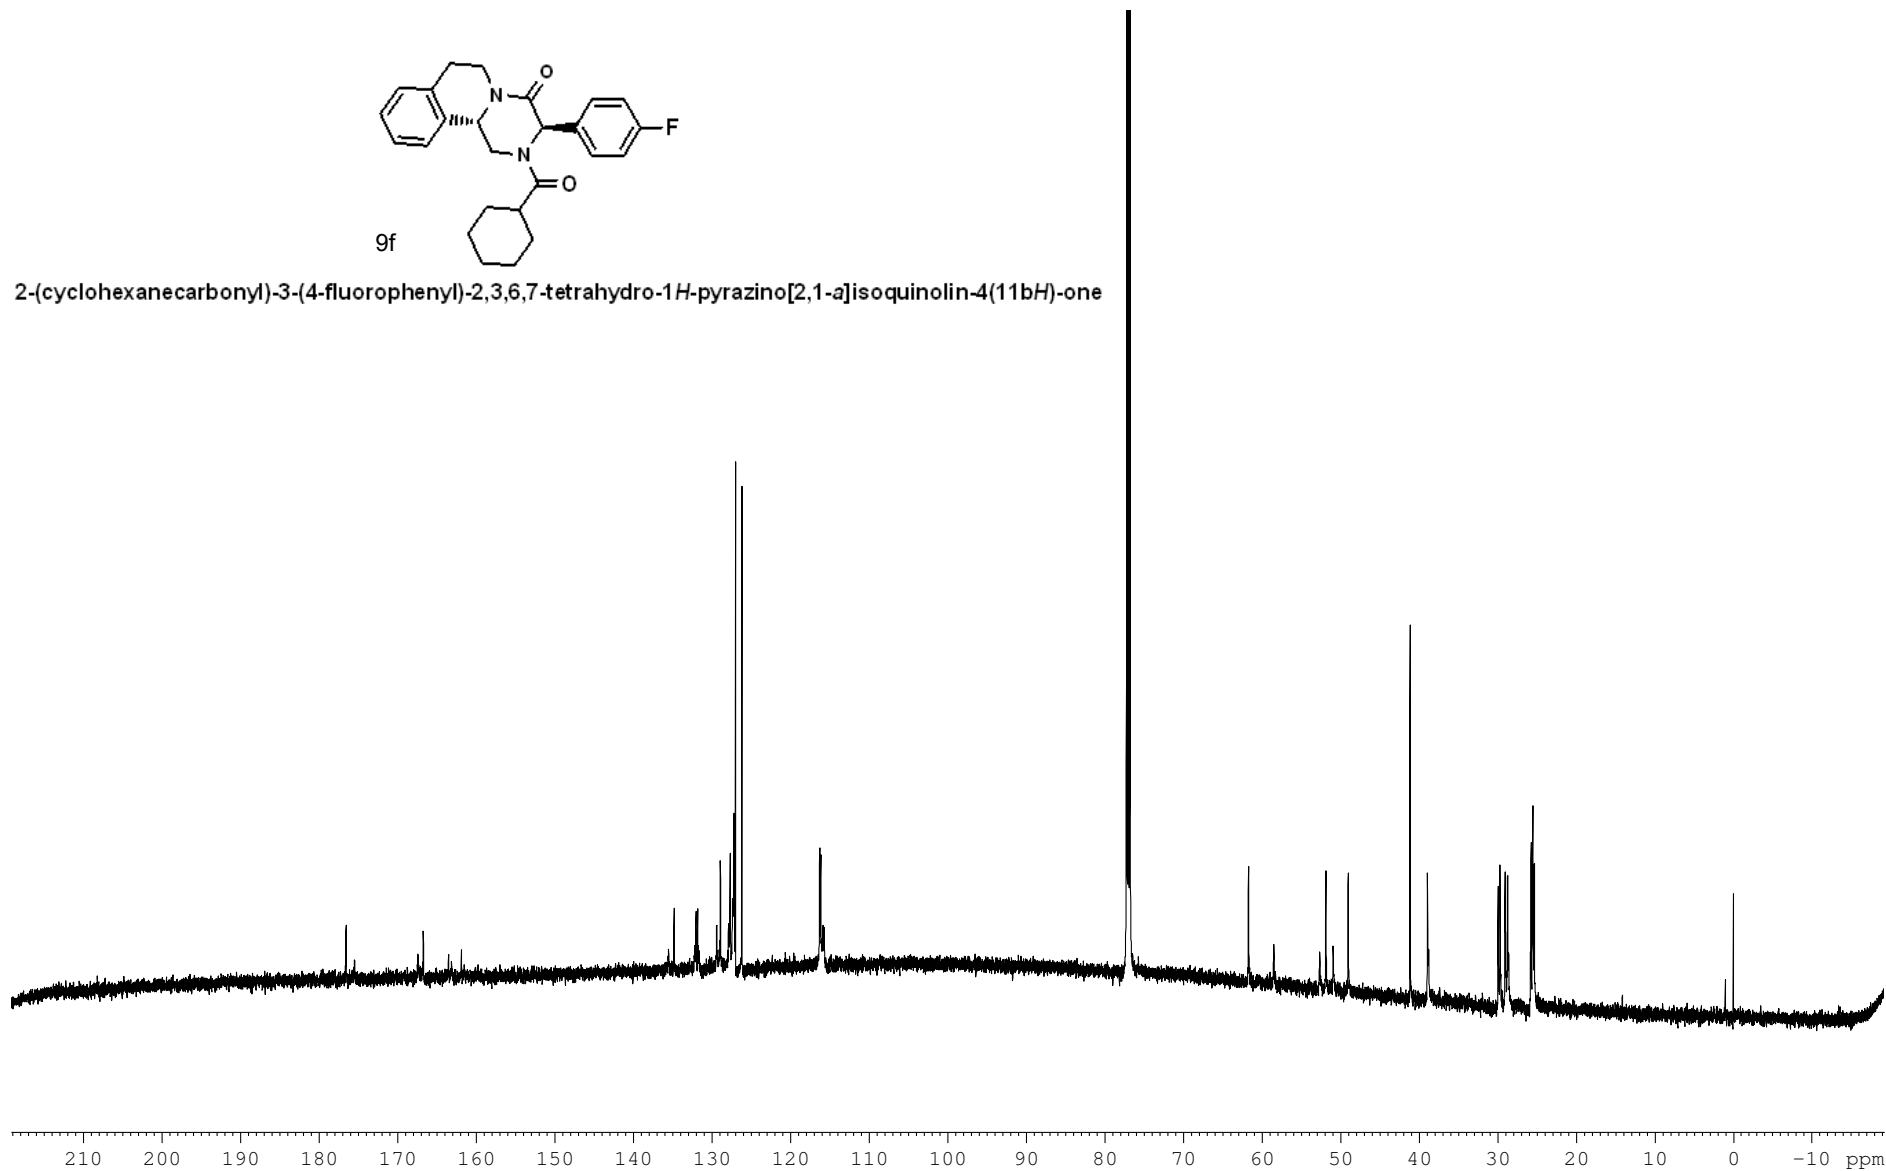

LHX-130

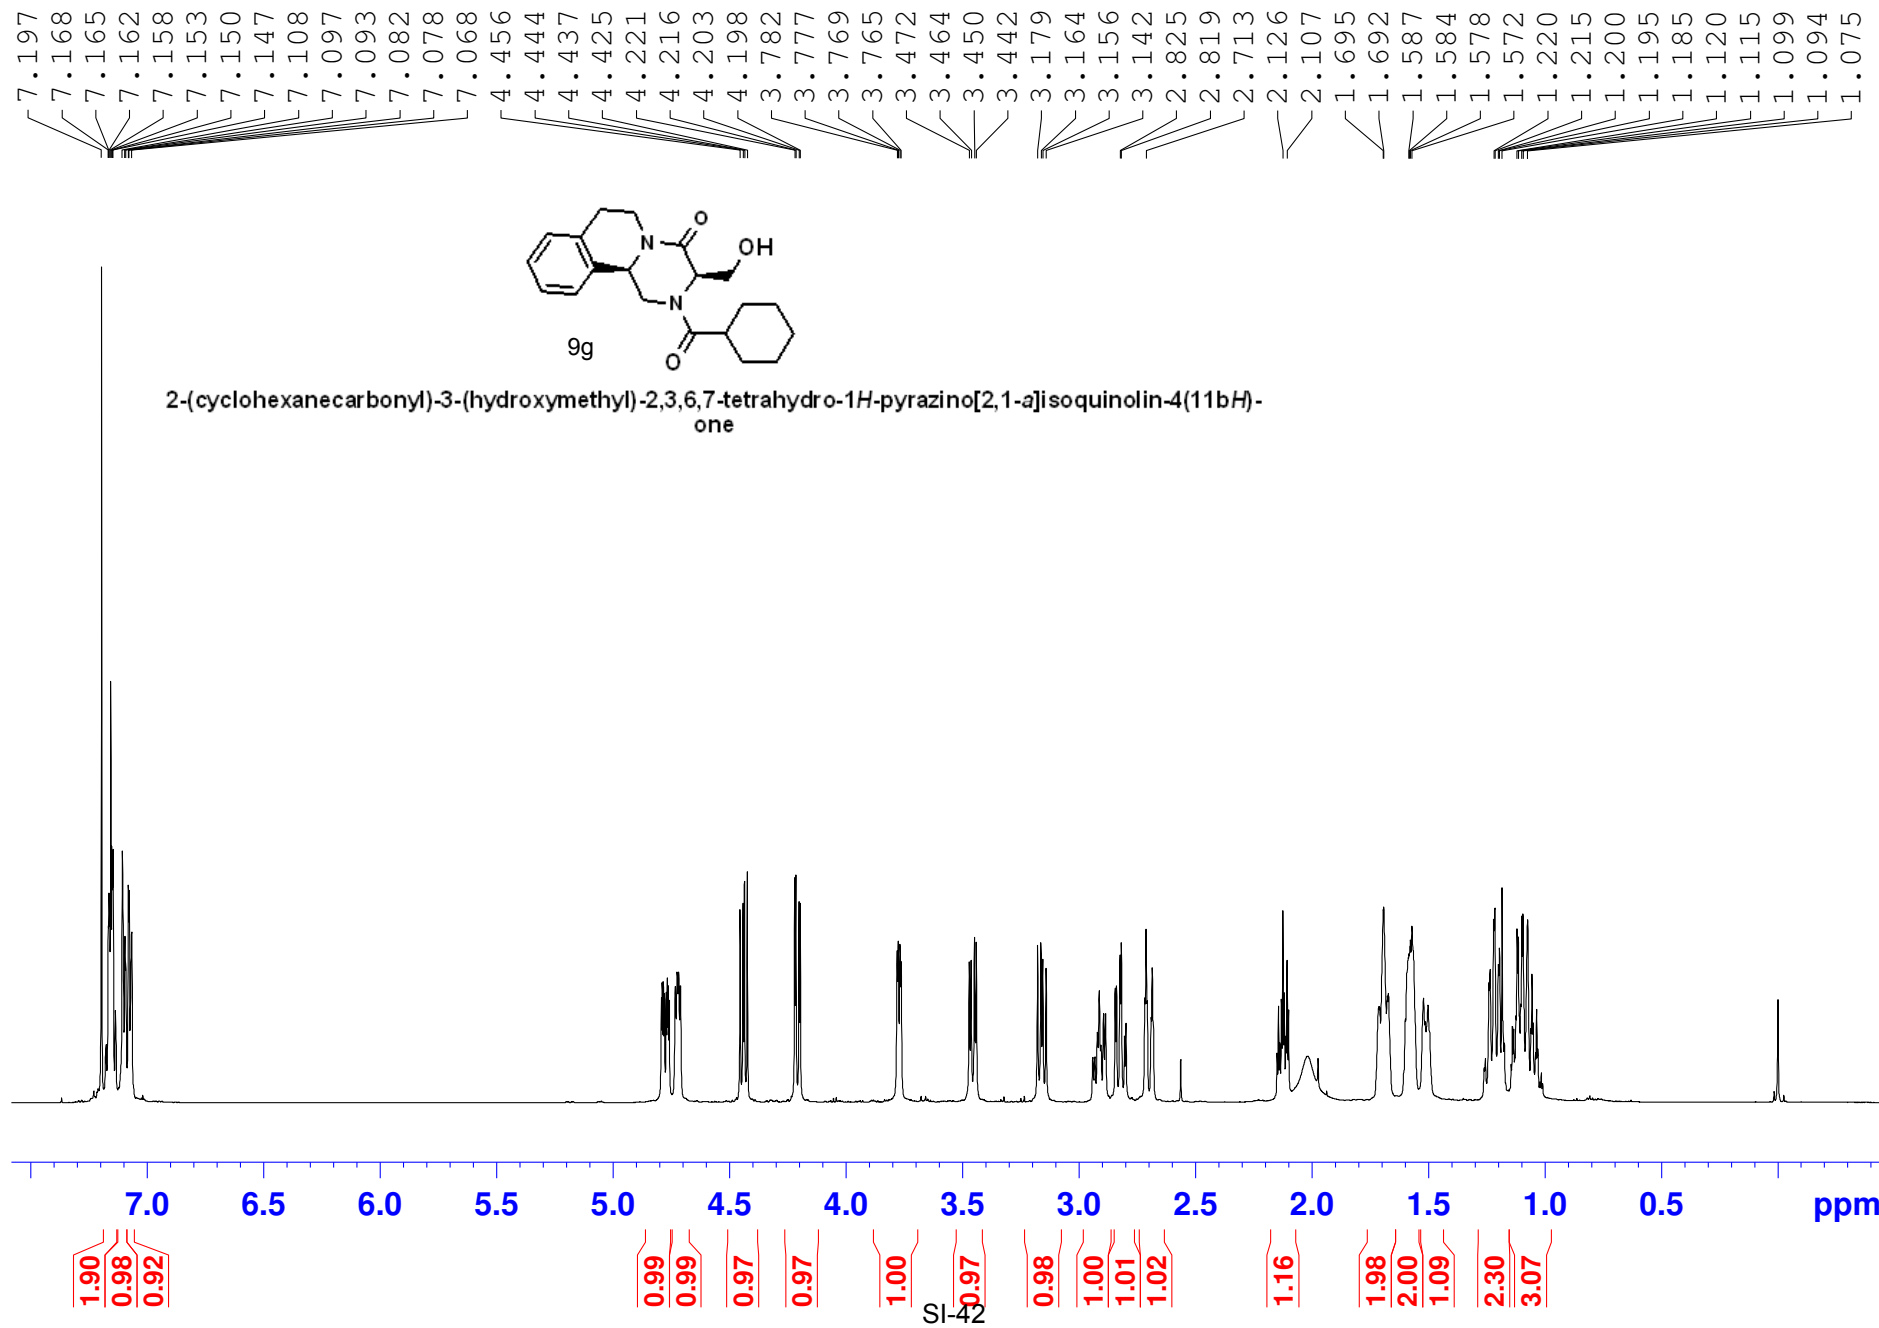

LHX-130, carbon

— 175.66

— 166.77

— 135.09

— 134.28

— 129.38

— 127.16

— 126.66

— 124.52

— 77.26

— 77.05

— 76.84

— 64.54

— 57.21

— 57.01

— 45.54

— 43.04

— 39.72

— 28.89

— 28.85

— 25.63

— 25.38

— 25.34

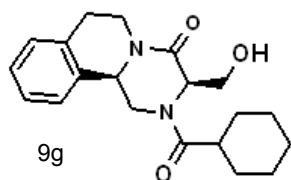

2-(cyclohexanecarbonyl)-3-(hydroxymethyl)-2,3,6,7-tetrahydro-1H-pyrazino[2,1-a]isoquinolin-4(1bH)-one

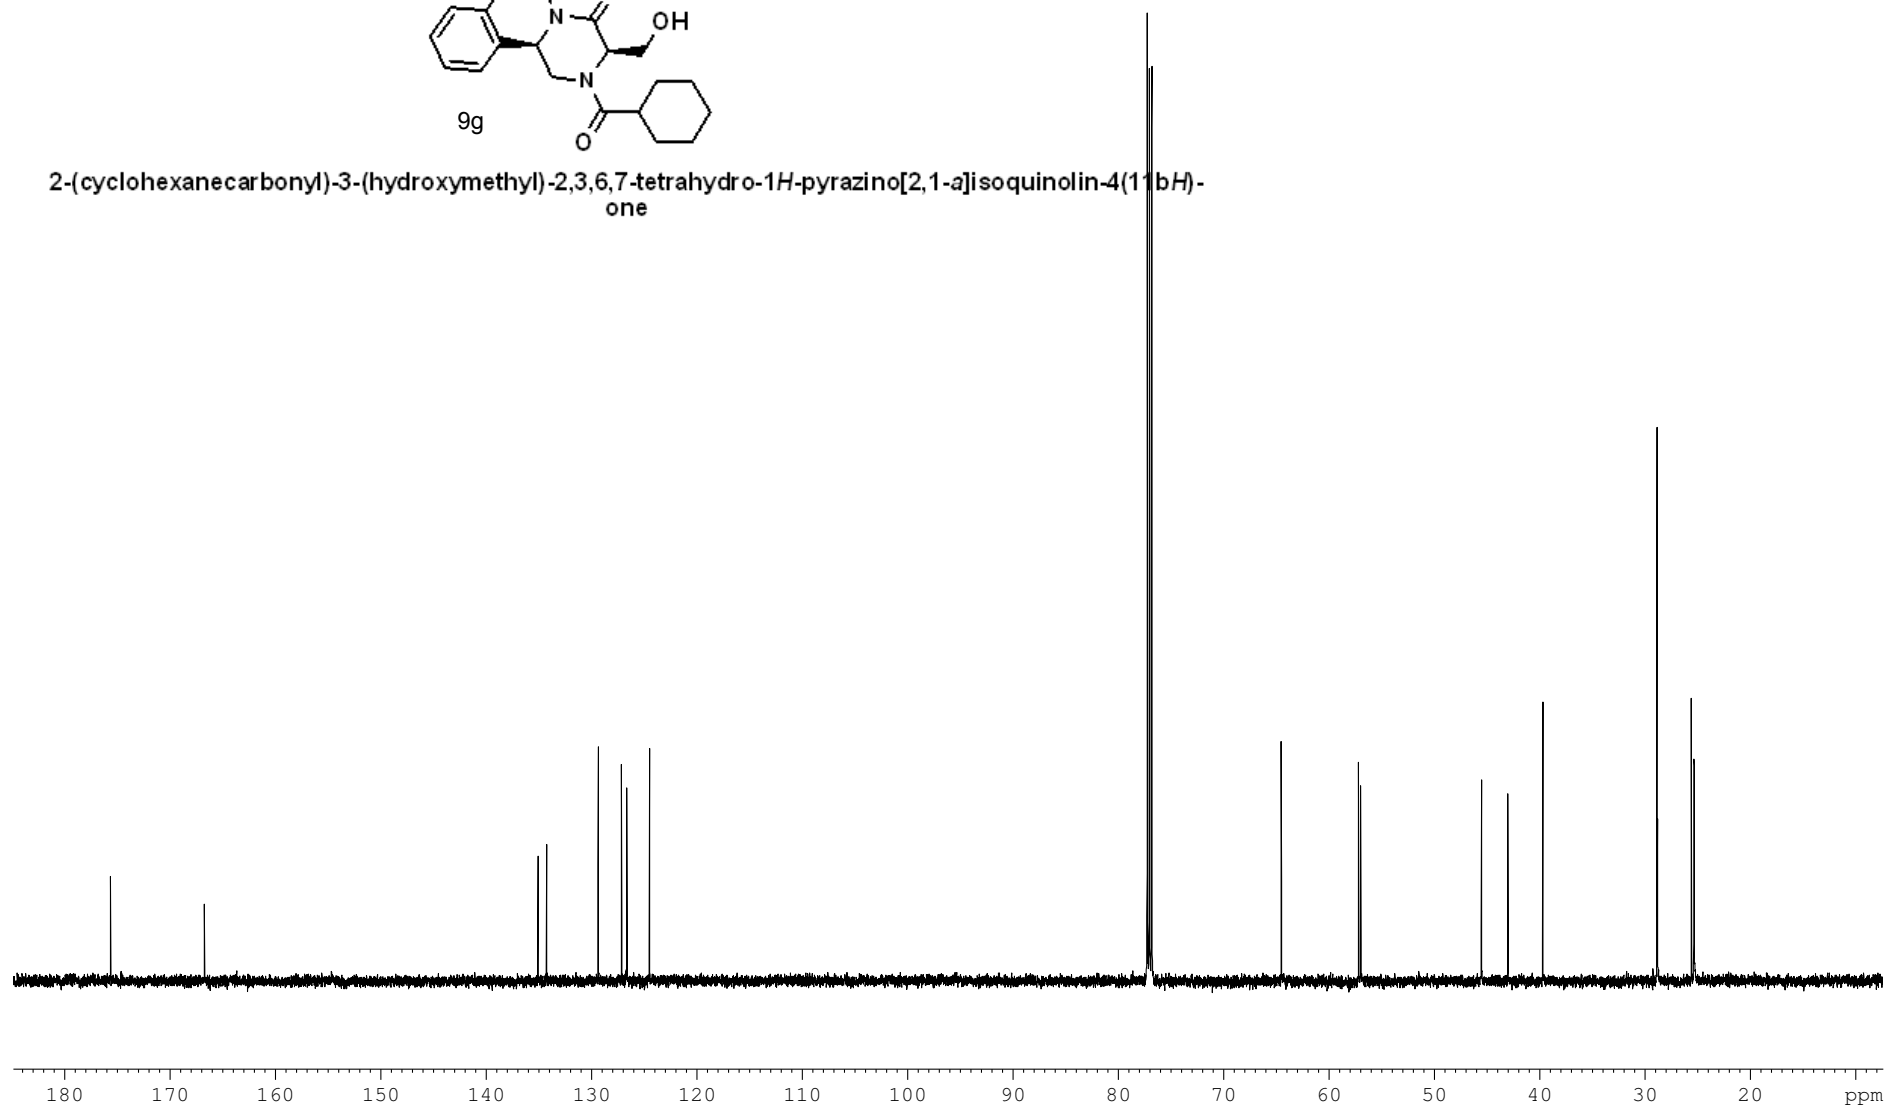

LHX-70, CDCl<sub>3</sub>, 600 MHz

7.282  
7.277  
7.261  
7.248  
7.237  
7.196  
7.184

5.146  
5.127  
4.951  
4.843  
4.835  
4.713  
4.684  
4.235  
4.206  
3.967  
3.938  
3.383  
3.367  
3.016  
3.008  
2.997  
2.989  
2.970  
2.963  
2.937  
2.916  
2.896  
2.866  
2.846  
2.825  
2.812  
2.786  
1.835  
1.715  
1.123  
1.118  
1.110  
1.107  
1.102  
1.100  
1.095  
1.018  
1.011  
0.882  
0.871  
0.002

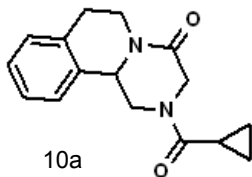

2-(cyclopropanecarbonyl)-2,3,6,7-tetrahydro-1H-pyrazino[2,1-a]isoquinolin-4(11bH)-one

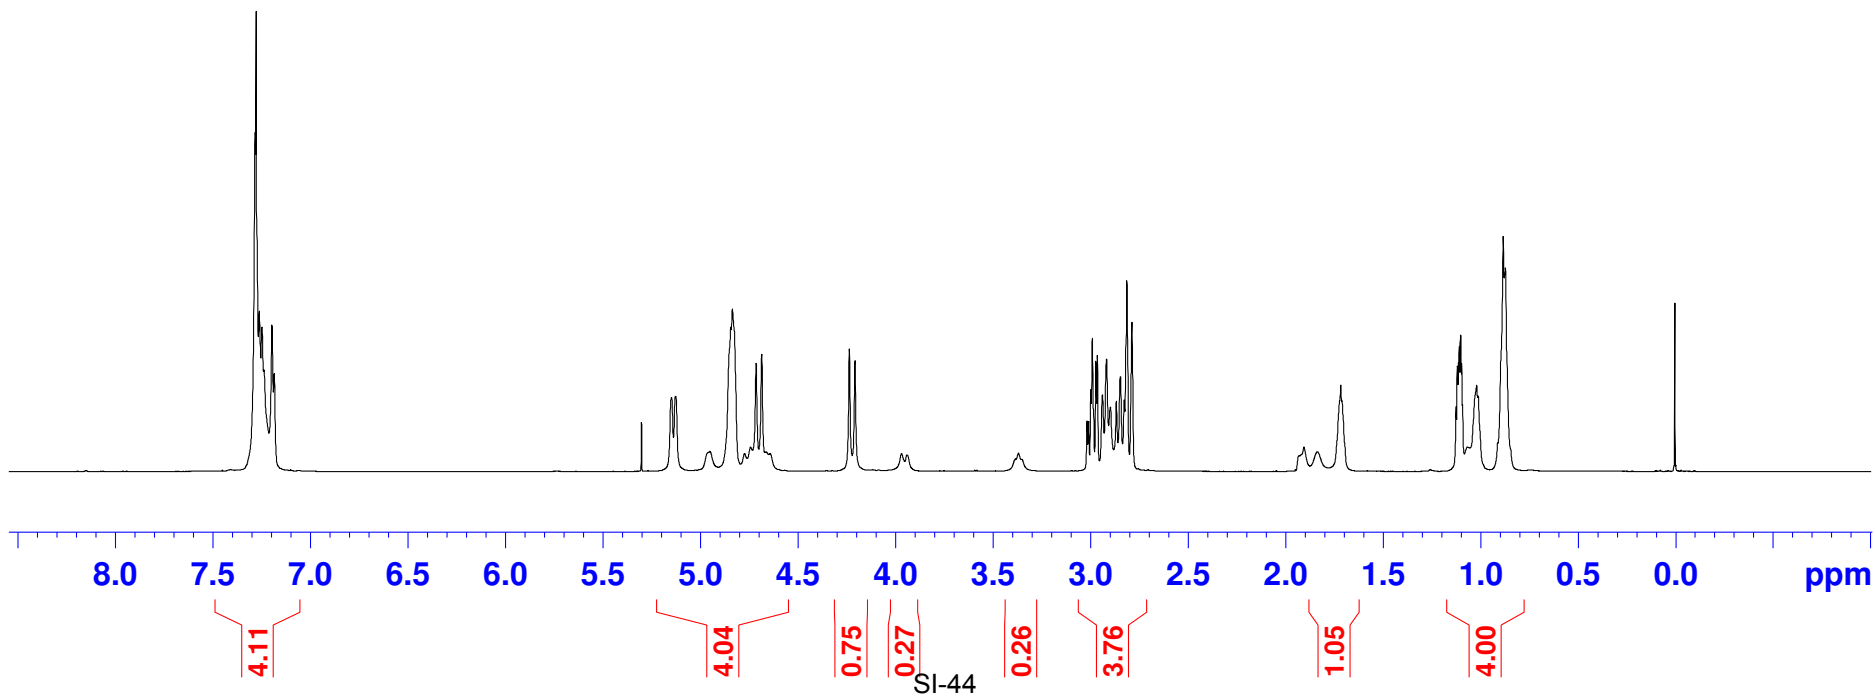

LHX-70, CDCl<sub>3</sub>, 600 MHz

— 172.34

— 164.46

— 134.81

— 132.65

— 129.30

— 127.45

— 126.97

— 125.58

— 77.29

— 77.08

— 76.87

— 54.87

— 48.95

— 45.58

— 39.01

— 28.75

— 11.22

— 8.39

— 8.08

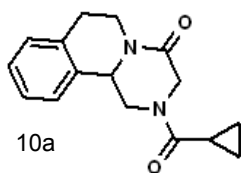

2-(cyclopropanecarbonyl)-2,3,6,7-tetrahydro-1H-pyrazino[2,1-a]isoquinolin-4(11bH)-one

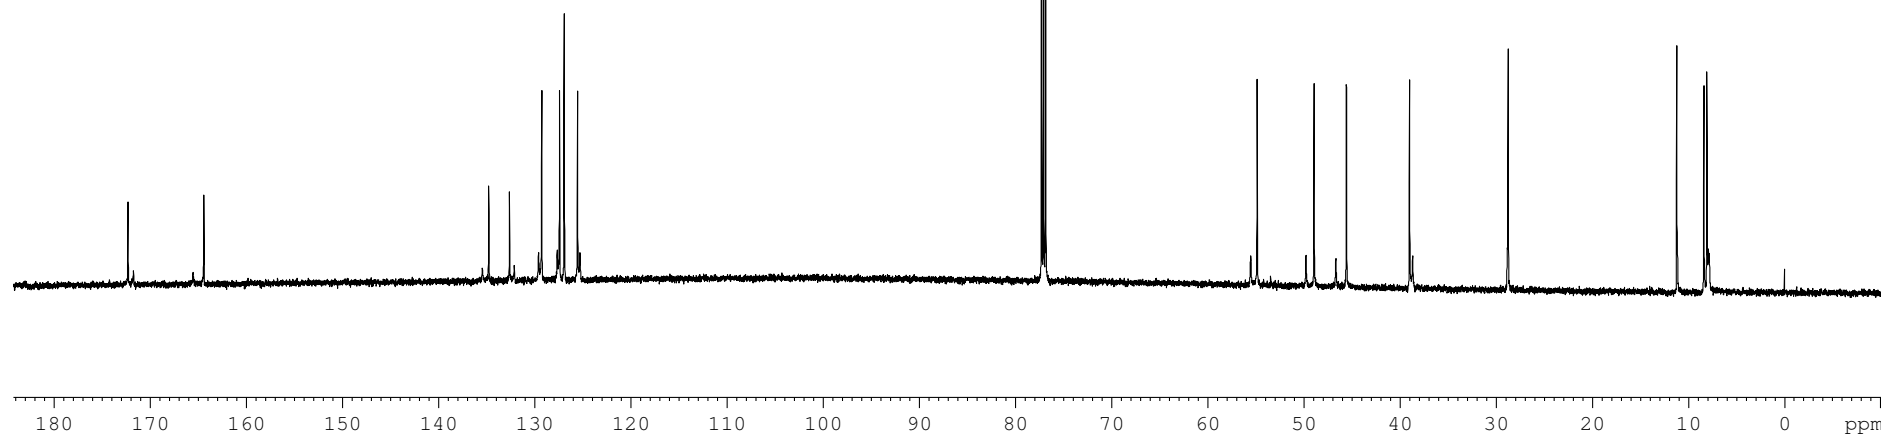

SI-45

LHX-72, CDC13, 600 MHz

7.504  
7.278  
7.218  
5.279  
5.002  
4.828  
4.371  
4.129  
4.107  
4.096  
3.033  
3.025  
3.006  
2.987  
2.980  
2.938  
2.934  
2.918  
2.913  
2.898  
2.893  
2.824  
2.820  
2.793

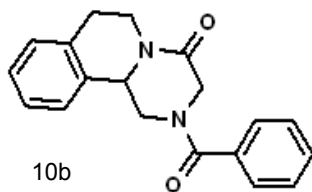

2-benzoyl-2,3,6,7-tetrahydro-1H-pyrazino[2,1-a]isoquinolin-4(11bH)-one

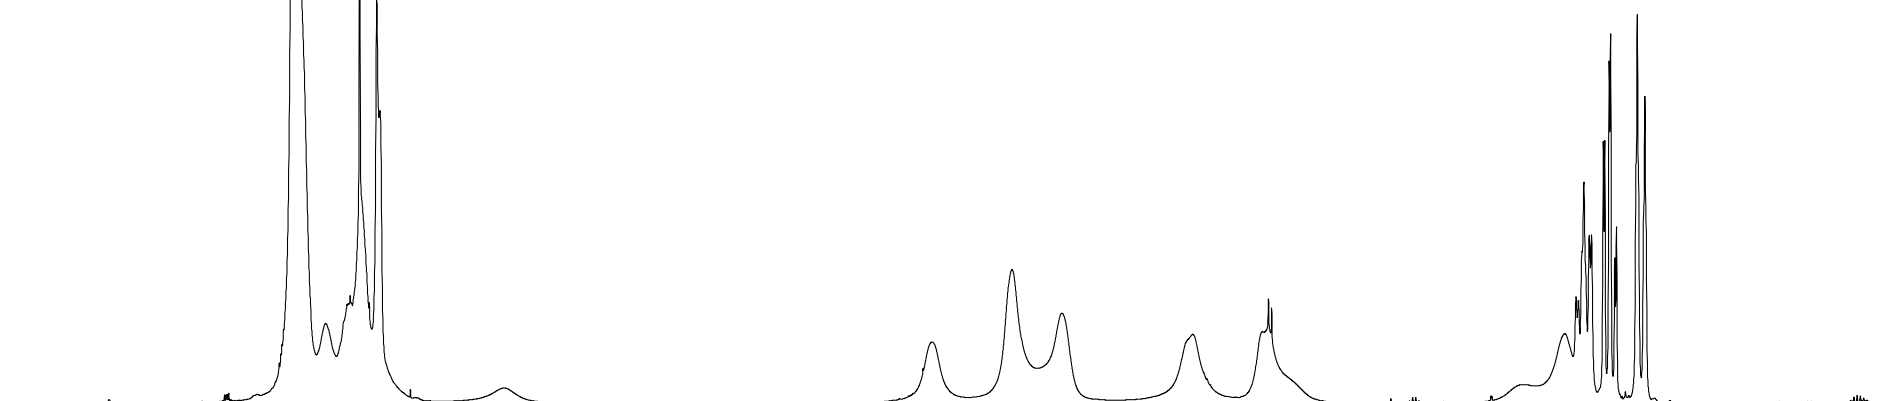

8.0 7.5 7.0 6.5 6.0 5.5 5.0 4.5 4.0 3.5 3.0 2.5 ppm

8.53  
3.06  
2.15  
2.97  
1.00

SI-46

LHX-72, CDCl<sub>3</sub>, 600 MHz

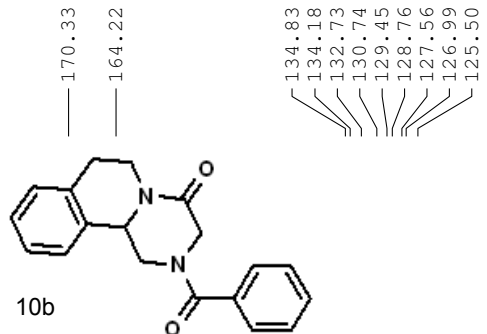

2-benzoyl-2,3,6,7-tetrahydro-1H-pyrazino[2,1-a]isoquinolin-4(11bH)-one

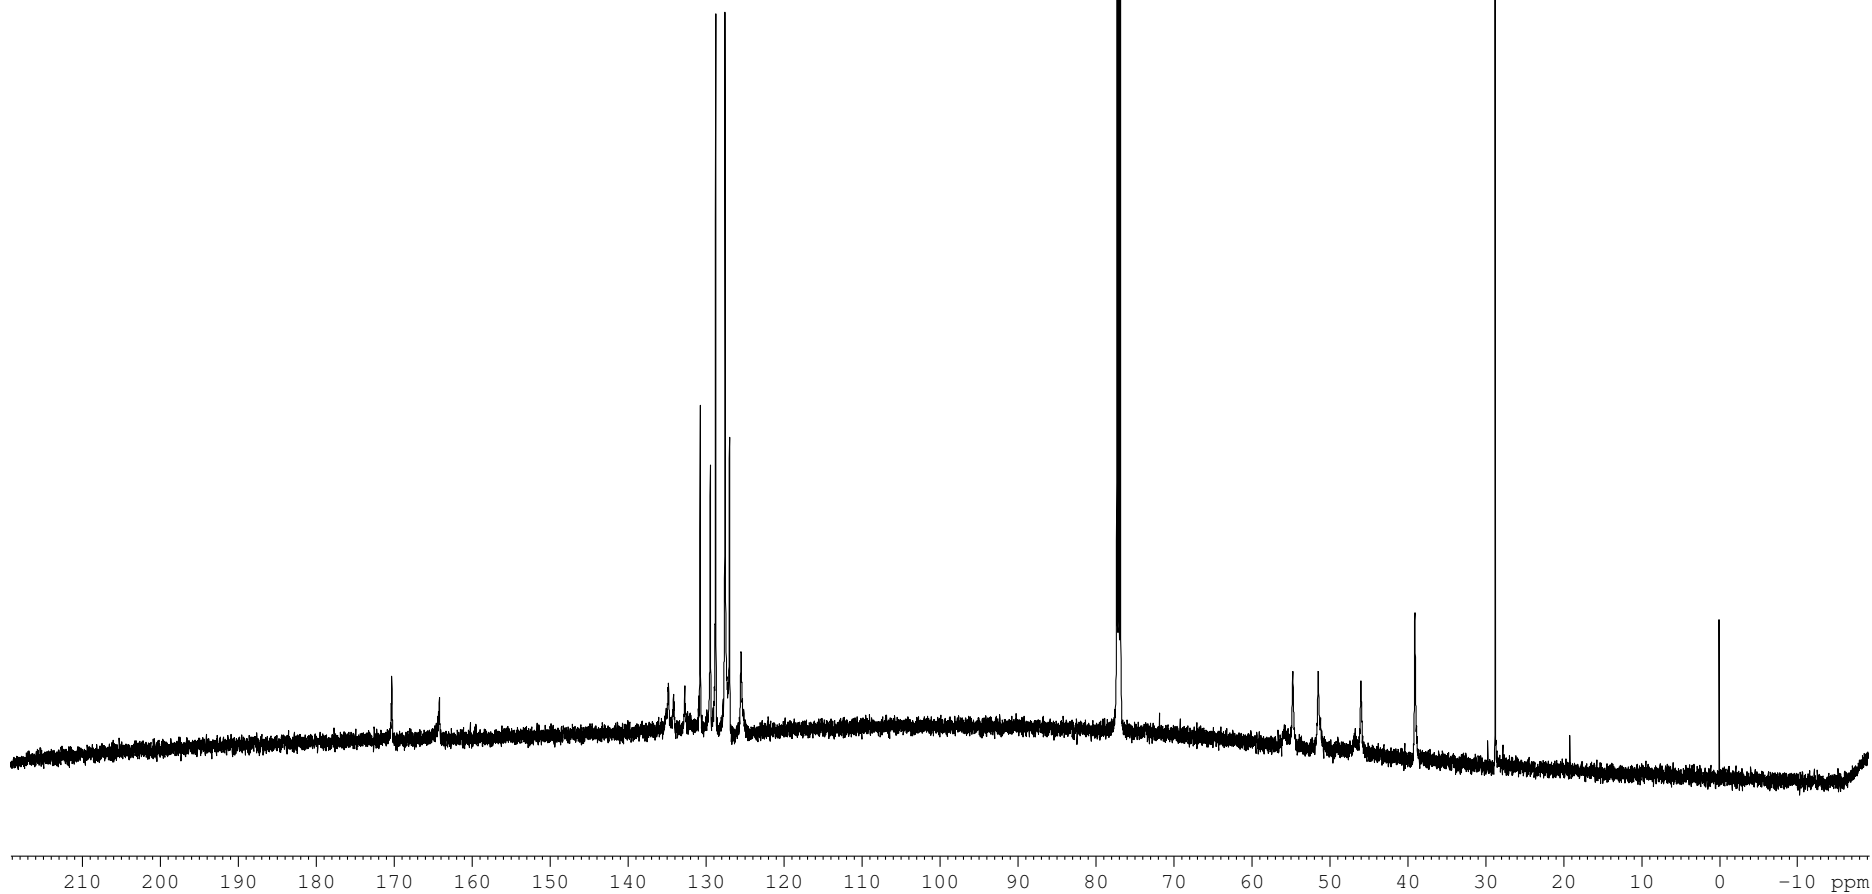

LHX-101, CDCl<sub>3</sub>, NMR600

7.405  
7.392  
7.333  
7.321  
7.308  
7.295  
7.282  
7.278  
7.270  
7.221  
7.209  
7.180  
7.168  
7.165  
7.157  
7.144  
7.131  
7.104  
7.092  
7.063  
7.048  
6.679  
5.331  
5.312  
5.063  
4.988  
4.981  
4.971  
4.964  
4.832  
4.829  
4.811  
4.112  
4.082  
4.069  
4.047  
4.039  
3.931  
3.901  
3.088  
3.077  
3.005  
2.986  
2.979  
2.953  
2.932  
2.911  
2.885  
2.824  
2.797  
2.402  
2.366  
2.348  
2.314  
2.271

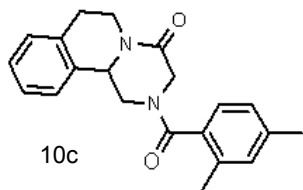

2-(2,4-dimethylbenzoyl)-2,3,6,7-tetrahydro-1H-pyrazino[2,1-a]isoquinolin-4(11bH)-one

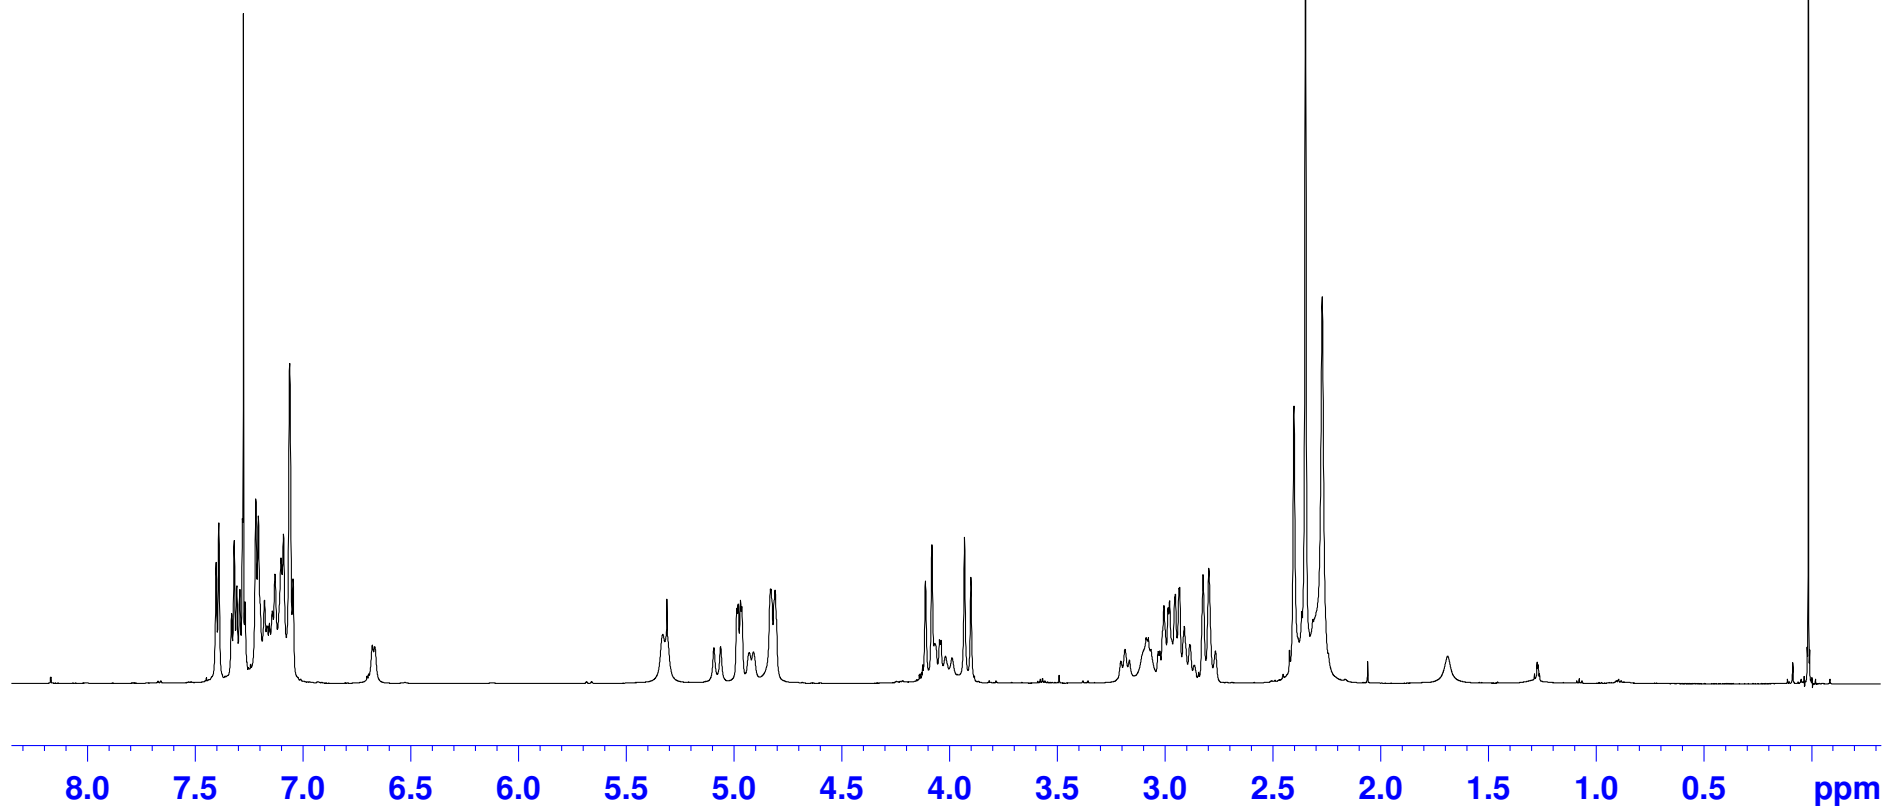

SI-48



LHX-101, CDCl<sub>3</sub>, NMR600

170.38  
170.06  
164.88  
164.30

139.70  
135.25  
134.78  
132.72  
131.95  
131.65  
131.48  
129.53  
129.39  
128.87  
127.56  
127.03  
126.86  
126.08  
125.51  
125.06

77.25  
77.04  
76.83

55.89  
55.13  
50.27  
46.00  
45.09  
39.19  
38.80

28.79  
28.73  
21.35  
21.25  
18.95

0.01

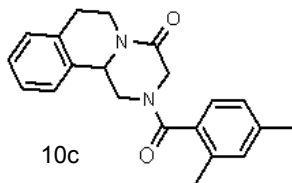

2-(2,4-dimethylbenzoyl)-2,3,6,7-tetrahydro-1H-pyrazino[2,1-a]isoquinolin-4(11bH)-one

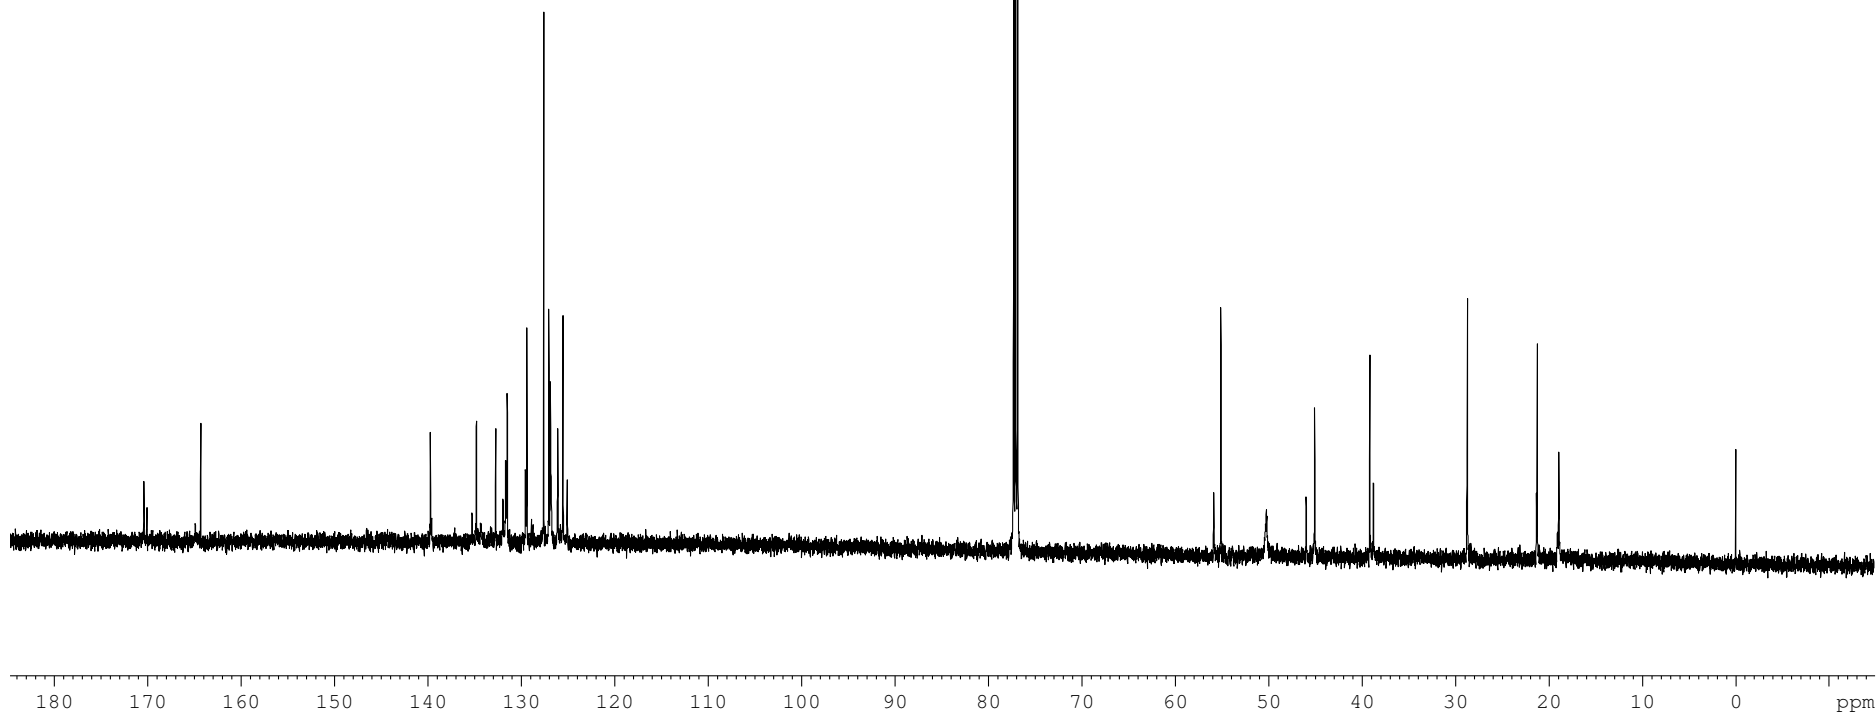

LHX-118, CDCl<sub>3</sub>, 600 MHz

8.283  
8.280  
8.271  
8.268  
7.836  
7.832  
7.824  
7.458  
7.443  
7.428  
7.323  
7.291  
7.278  
7.237  
7.227  
7.223

5.314  
5.200  
5.024  
5.012  
4.830

4.272  
4.201  
3.135  
3.041  
3.033  
3.021  
3.014  
2.995  
2.988  
2.957  
2.952  
2.936  
2.931  
2.916  
2.911  
2.876  
2.865  
2.853

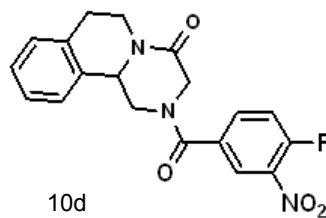

2-(4-fluoro-3-nitrobenzoyl)-2,3,6,7-tetrahydro-1H-pyrazino[2,1-a]isoquinolin-4(1H)-one

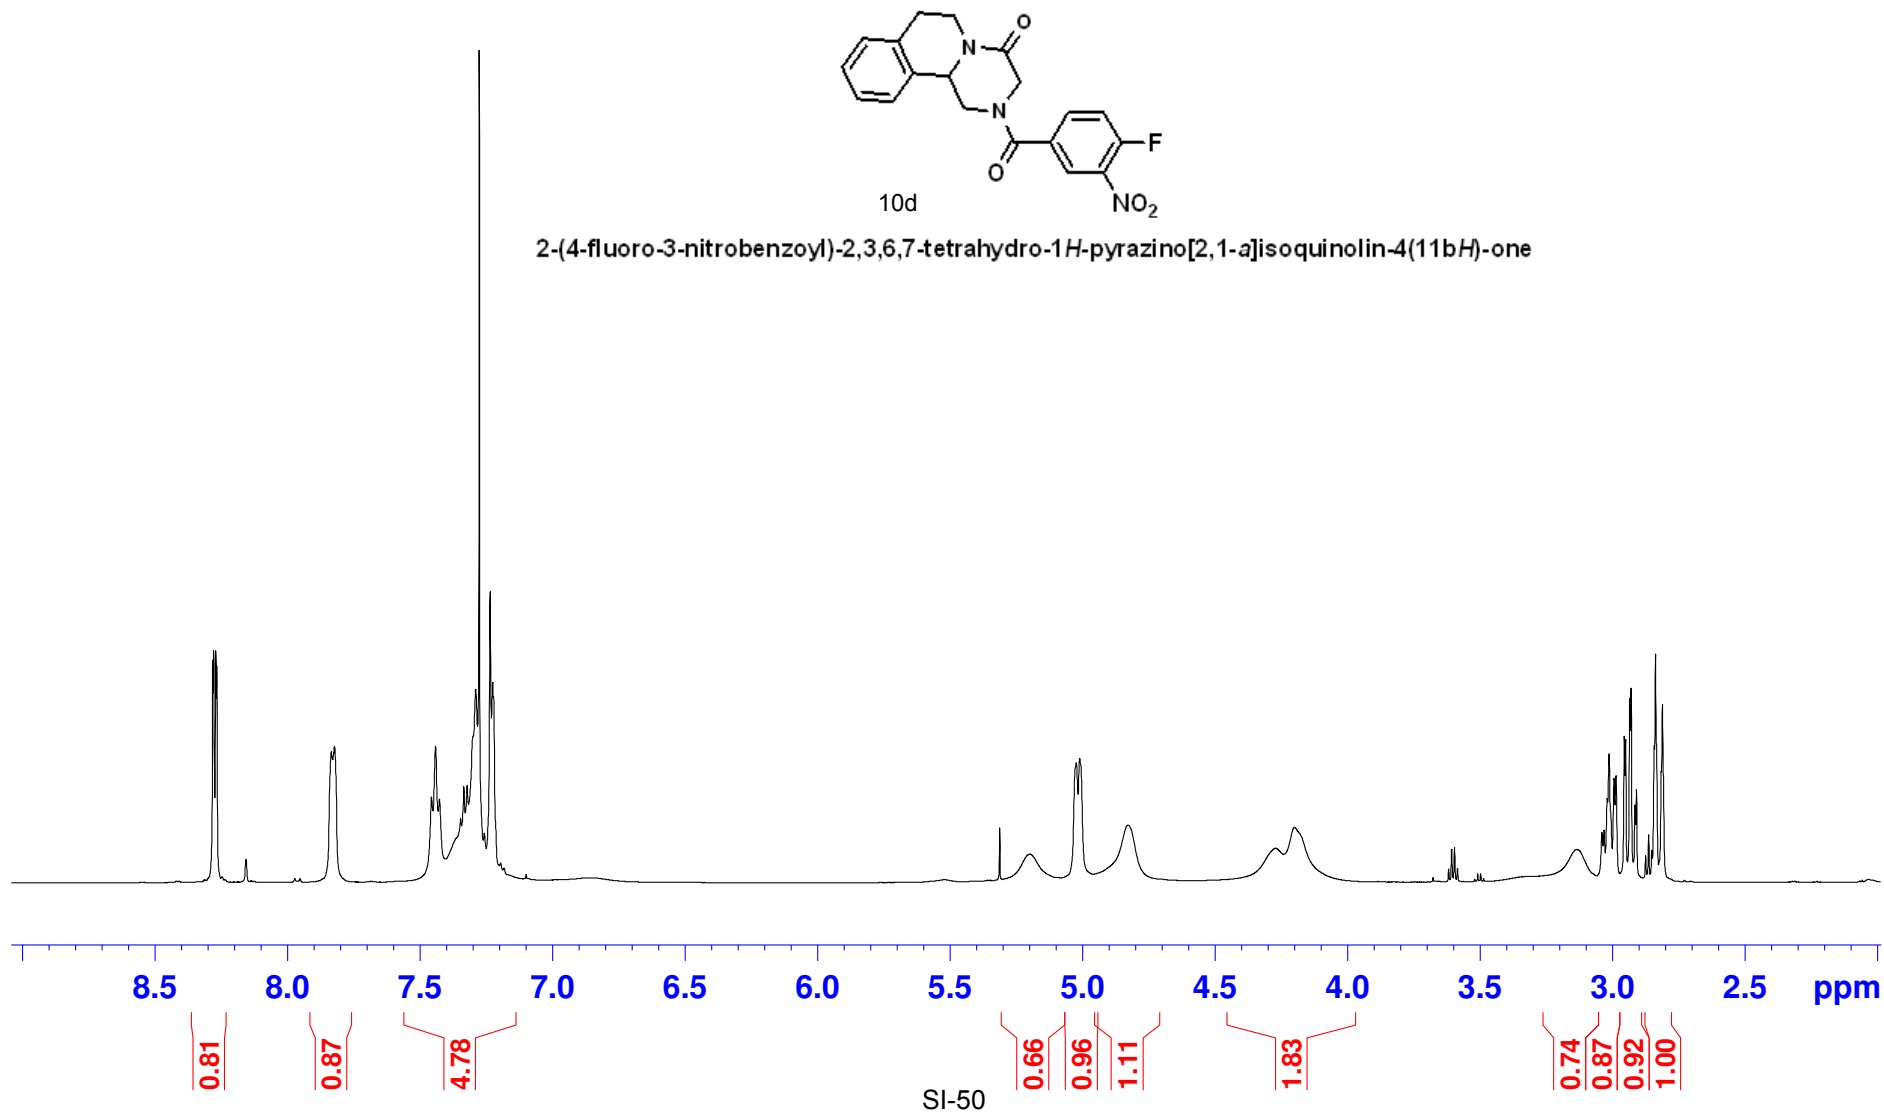

LHX-118, CDCl<sub>3</sub>, 600 MHz

166.72  
163.35  
161.10  
157.46  
155.67

138.45  
137.29  
137.24  
134.86  
134.80  
132.20  
131.09  
129.57  
128.88  
128.76  
128.74  
127.79  
127.12  
126.70  
126.04  
125.35  
119.36  
119.22

77.25  
77.04  
76.83

54.49  
51.28

46.37

39.16  
39.11  
35.50

29.71  
28.68

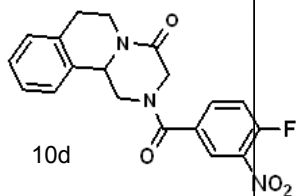

2-(4-fluoro-3-nitrobenzoyl)-2,3,6,7-tetrahydro-1H-pyrazino[2,1-a]isoquinolin-4(11bH)-one

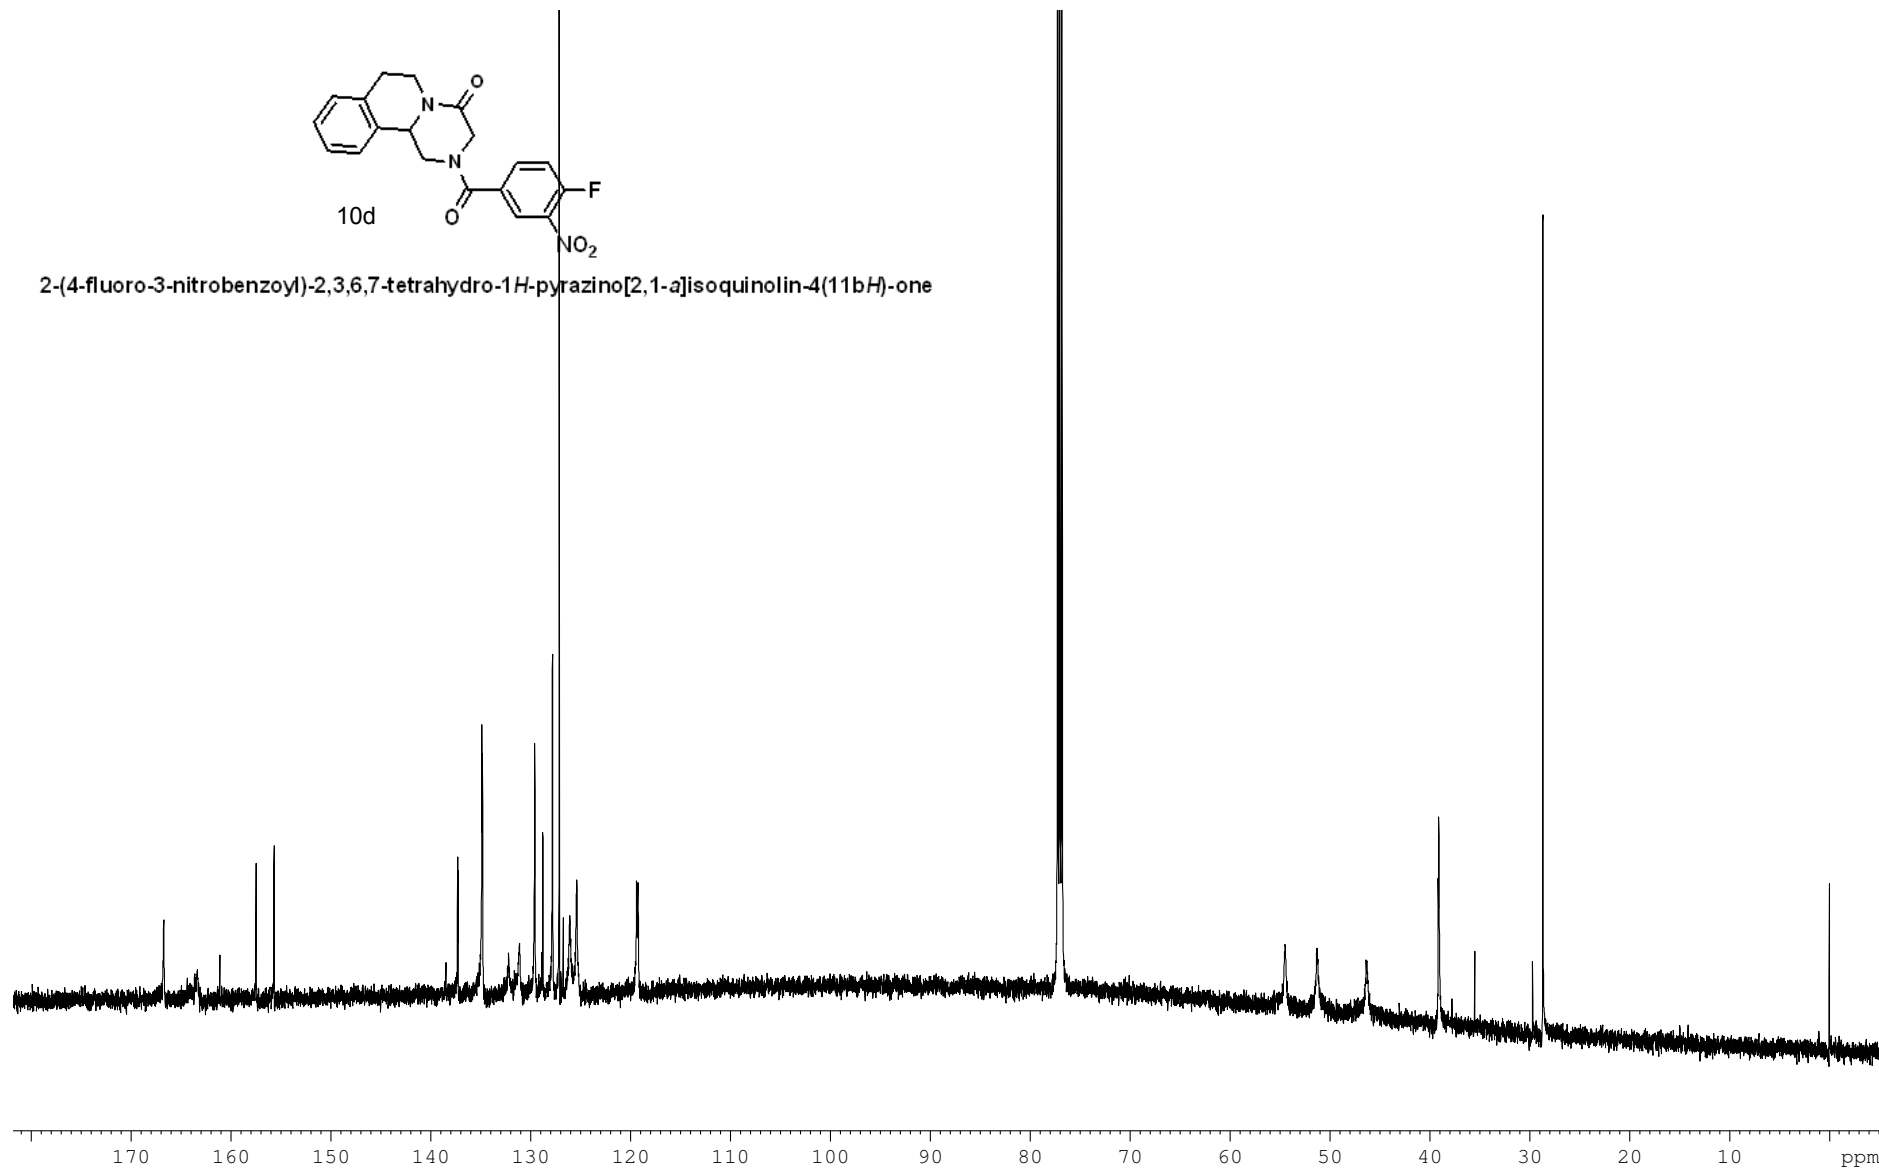

LHX-140, CDCl<sub>3</sub>, 600 MHz

8.300  
8.286  
8.246  
8.232  
8.081  
8.067  
8.053  
7.800  
7.787  
7.769  
7.649  
7.637  
7.624  
7.611  
7.598  
7.423  
7.410  
7.341  
7.325  
7.303  
7.291  
7.277  
7.257  
7.231  
7.216  
7.168  
7.109  
7.096  
5.325  
5.158  
5.128  
5.014  
4.985  
4.446  
4.416  
4.121  
4.043  
4.013  
3.271  
3.253  
3.248  
3.231  
3.162  
3.144  
3.140  
3.122  
3.035  
3.029  
3.009  
2.955  
2.951  
2.837  
2.833  
2.827  
2.811

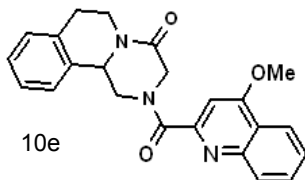

2-(4-methoxyquinoline-2-carbonyl)-2,3,6,7-tetrahydro-1H-pyrazino[2,1-a]isoquinolin-4(11bH)-one

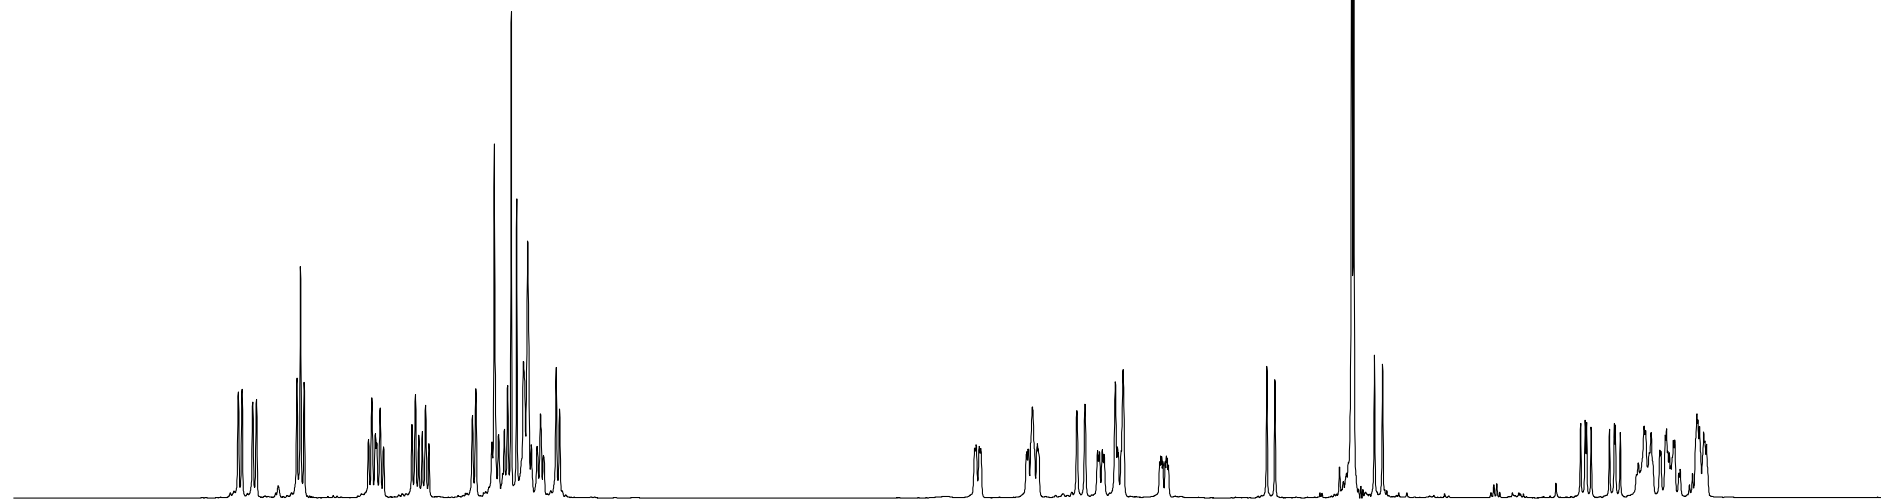

9.0 8.5 8.0 7.5 7.0 6.5 6.0 5.5 5.0 4.5 4.0 3.5 3.0 2.5 ppm

0.50  
0.43  
0.88  
0.92  
0.49  
0.43  
0.45  
2.44  
1.49  
0.50  
0.54  
0.48  
0.92  
0.55  
0.45  
0.92  
0.47  
0.47  
2.82  
0.53  
0.49  
0.48  
0.96  
0.96  
1.00

LHX-140, CDCl<sub>3</sub>, 600 MHz

167.66  
166.79  
164.87  
164.83  
163.51  
163.45  
153.51  
153.19  
147.43  
147.34  
135.15  
134.92  
132.79  
132.72  
130.69  
130.55  
129.54  
129.41  
129.37  
129.15  
127.54  
127.33  
127.17  
127.04  
126.85  
125.62  
125.33  
122.10  
121.83  
121.70  
121.46  
100.81  
100.22

77.30  
77.09  
76.87

56.15  
56.13  
56.09  
54.64  
51.17  
51.08  
47.63  
46.51

38.98  
38.80

28.95  
28.77

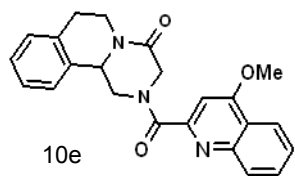

2-(4-methoxyquinoline-2-carbonyl)-2,3,6,7-tetrahydro-1H-pyrazino[2,1-a]isoquinolin-4(11bH)-one

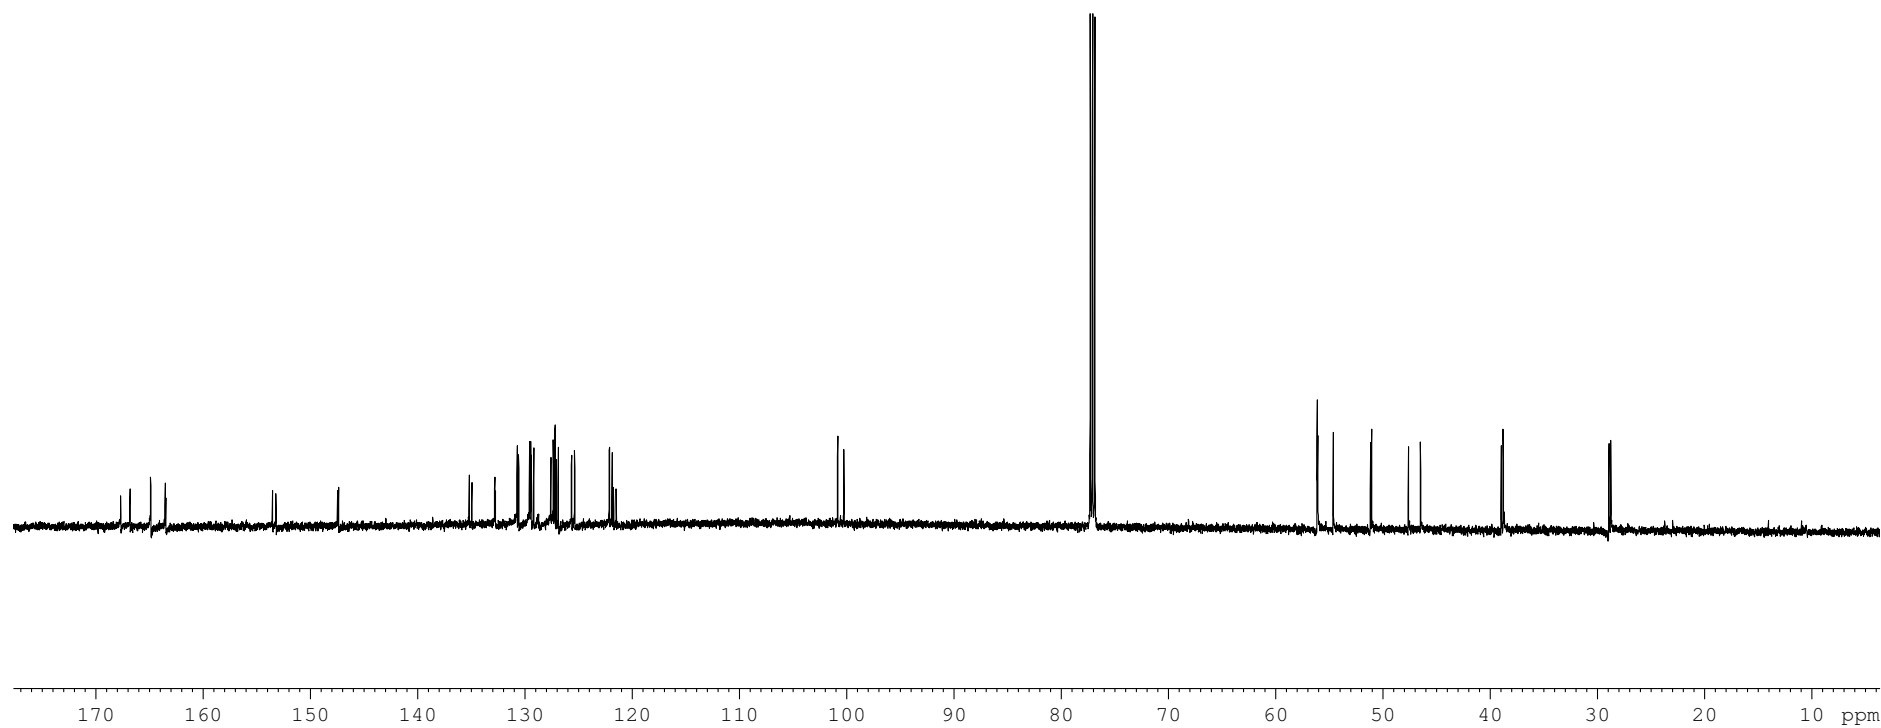

LHX-141, CDC13, 600 MHz

8.478  
8.472  
8.455  
8.448  
7.338  
7.328  
7.317  
7.307  
7.296  
7.285  
7.277  
7.271  
7.261  
7.255  
7.244  
7.228  
7.214  
7.203  
7.194  
5.309  
5.079  
5.076  
5.072  
5.069  
5.056  
5.054  
5.049  
5.047  
4.840  
4.833  
4.827  
4.823  
4.815  
4.809  
4.782  
4.752  
4.488  
4.459  
4.229  
4.201  
3.963  
3.951  
3.946  
3.915  
3.894  
2.993  
2.978  
2.968  
2.960  
2.955  
2.938  
2.932  
2.825  
2.821  
2.795

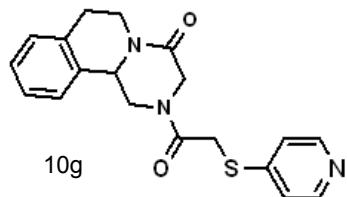

2-(2-(pyridin-4-ylthio)acetyl)-2,3,6,7-tetrahydro-1H-pyrazino[2,1-a]isoquinolin-4(11bH)-one

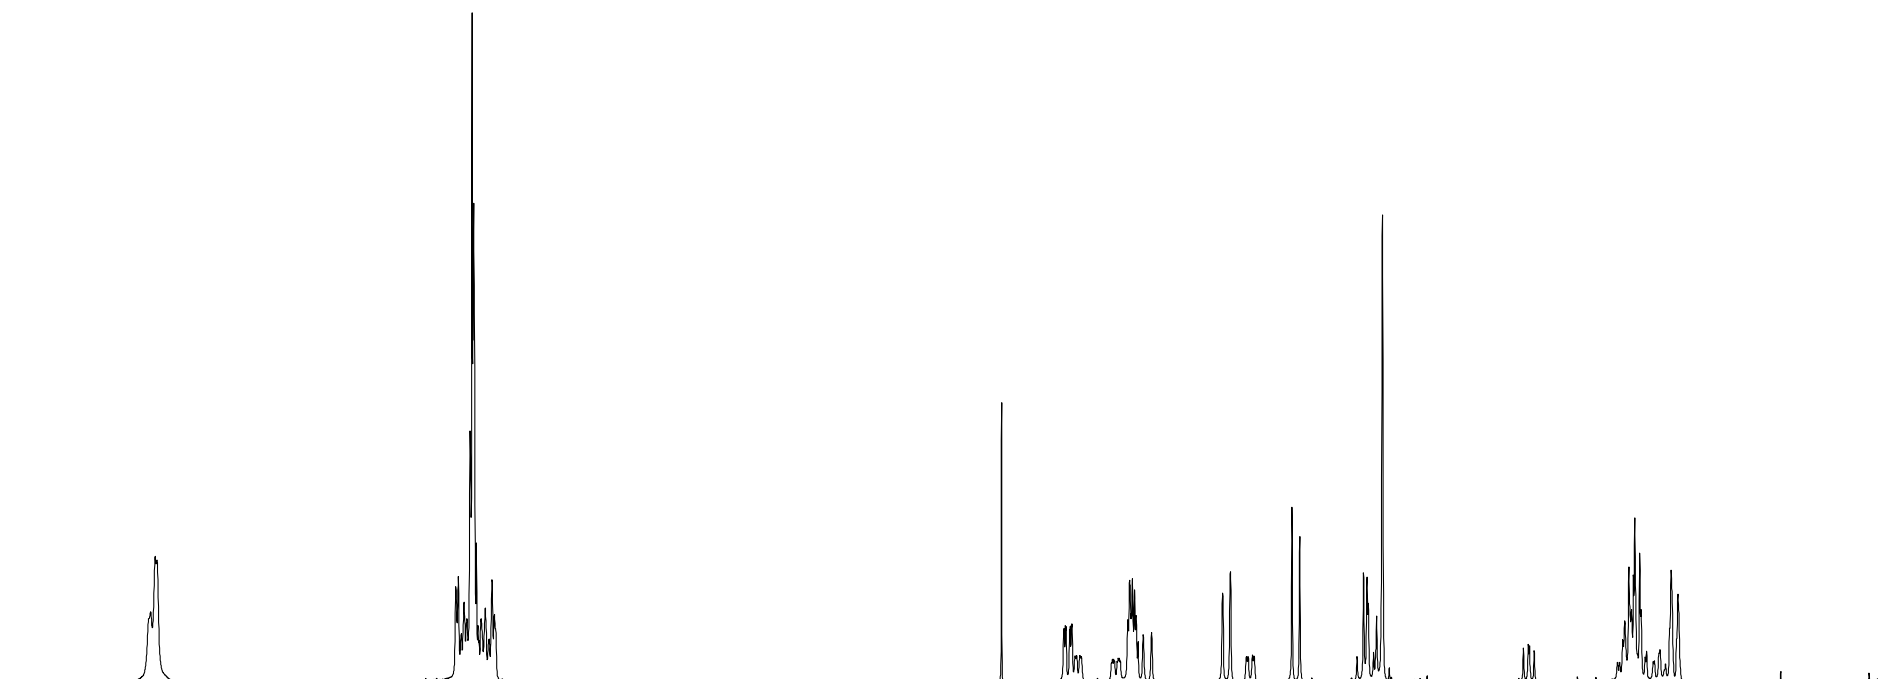

8.5  
1.89

7.5  
6.14

5.0  
1.00

4.5  
1.96

4.0  
0.70

0.40

0.70

2.21

3.5  
0.37

3.0  
3.63

LHX-141, CDCl<sub>3</sub>, 600 MHz

166.09  
165.72  
164.60  
163.44

149.66  
149.49  
146.99

135.41  
134.74  
132.17  
131.66  
129.75  
129.39  
127.86  
127.68  
127.06  
125.42  
125.30  
121.09  
120.96

77.26  
77.05  
76.84

55.38  
54.72  
50.58  
49.48  
46.56  
45.69

39.18  
38.63  
33.40  
33.26  
28.83  
28.64

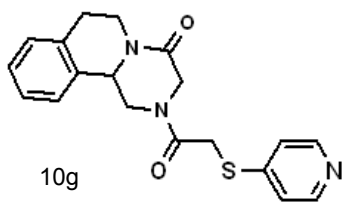

2-(2-(pyridin-4-ylthio)acetyl)-2,3,6,7-tetrahydro-1H-pyrazino[2,1-a]isoquinolin-4(11bH)-one

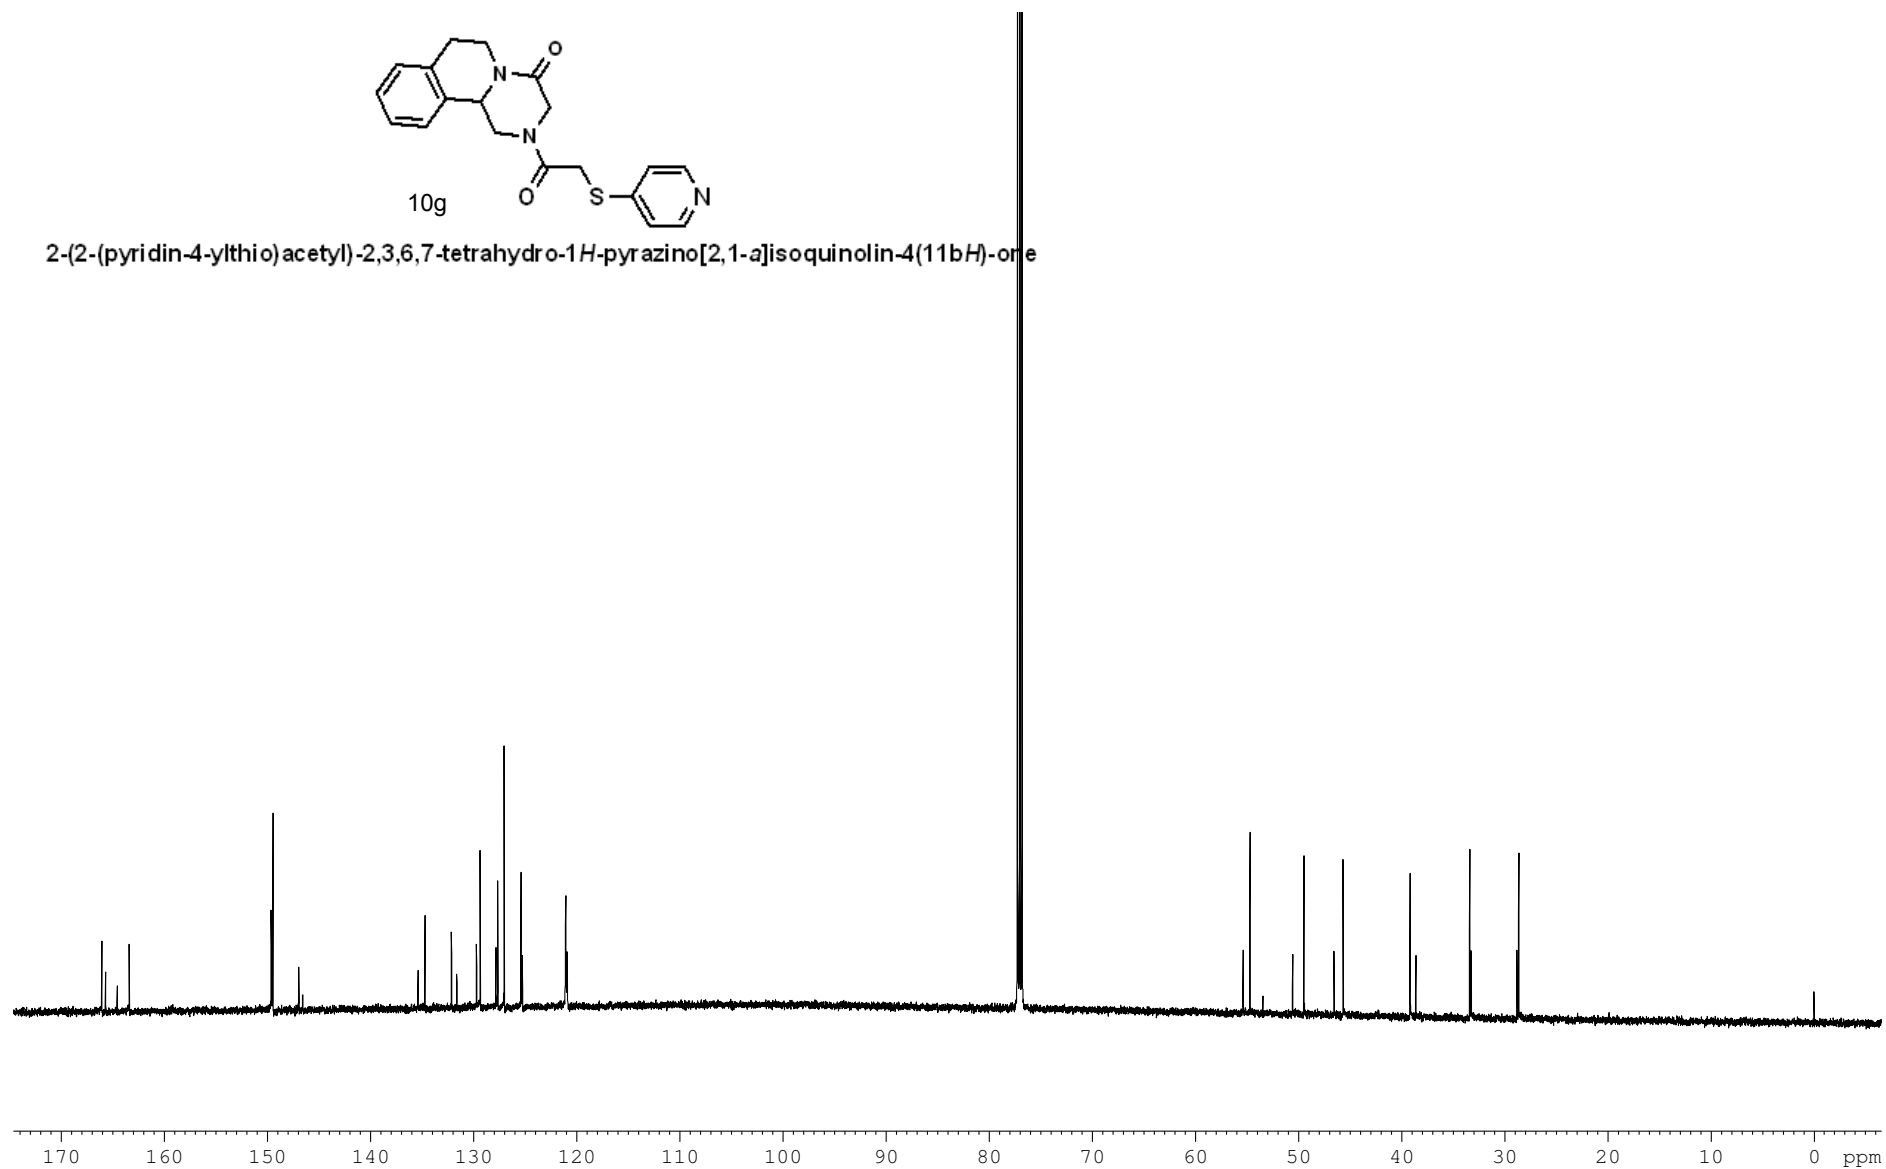

LHX-88, CDCl<sub>3</sub>, 600 MHz

8.053  
8.052  
8.040  
7.961  
7.947  
7.707  
7.706  
7.694  
7.693  
7.681  
7.681  
7.578  
7.552  
7.541  
7.529  
7.515  
7.379  
7.366  
7.333  
7.300  
7.277  
7.234  
7.222  
7.211  
7.188  
7.179  
6.939  
6.926  
5.033  
5.002  
4.259  
4.230  
4.144  
4.132  
4.120  
4.108  
4.092  
4.062  
4.014  
3.983  
3.319  
3.301  
3.296  
3.278  
3.202  
3.185  
3.180  
3.163  
2.981  
2.971  
2.947  
2.896  
2.830  
2.805  
2.800

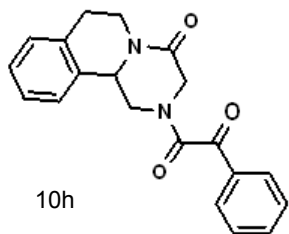

1-(4-oxo-3,4,6,7-tetrahydro-1H-pyrazino[2,1-a]isoquinolin-2(11bH)-yl)-2-phenylethane-1,2-dione

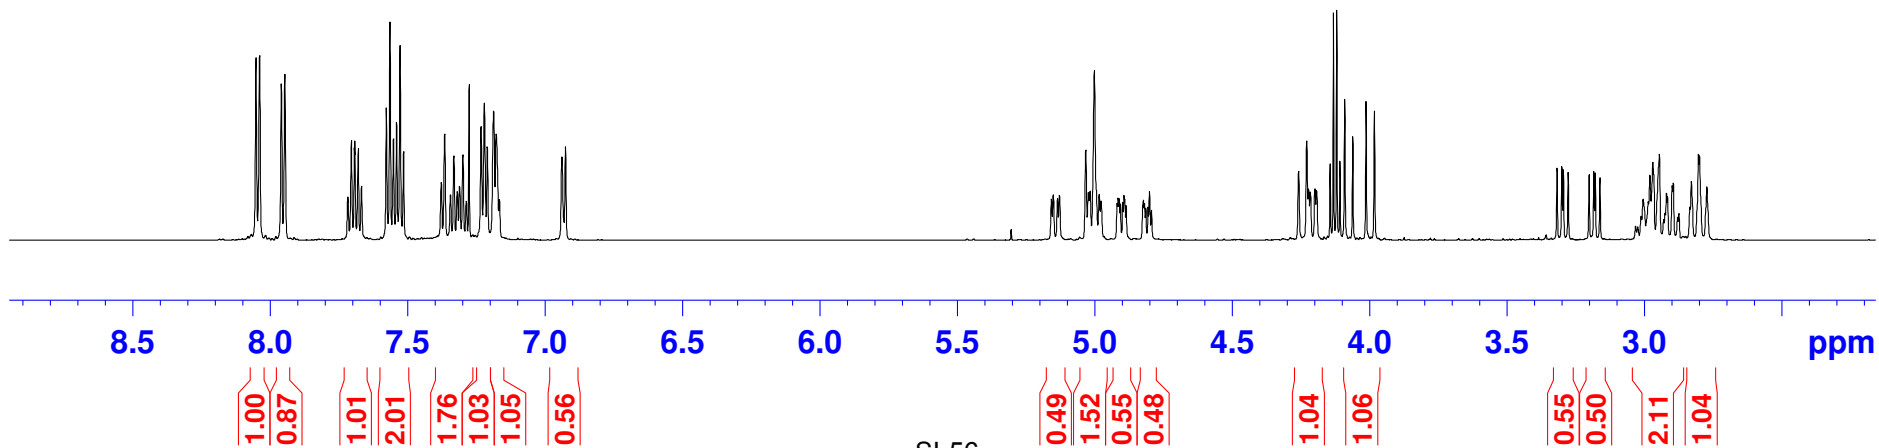

SI-56



LHX-88, CDCl<sub>3</sub>, 600 MHz

190.46  
190.25  
171.18  
165.12  
164.71  
163.84  
163.22  
135.31  
135.26  
135.08  
134.89  
132.92  
132.60  
132.17  
131.56  
130.02  
129.84  
129.54  
129.51  
129.19  
127.80  
127.70  
127.11  
126.94  
125.42  
125.26

77.27  
77.06  
76.85  
60.40  
55.68  
54.92  
49.63  
48.64  
45.49  
44.61  
39.26  
38.89  
28.75  
28.63  
21.07  
14.20

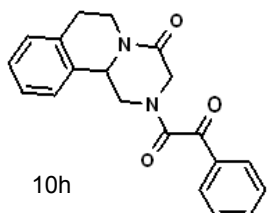

1-(4-oxo-3,4,6,7-tetrahydro-1H-pyrazino[2,1-a]isoquinolin-2(1H)-yl)-2-phenylethane-1,2-dione

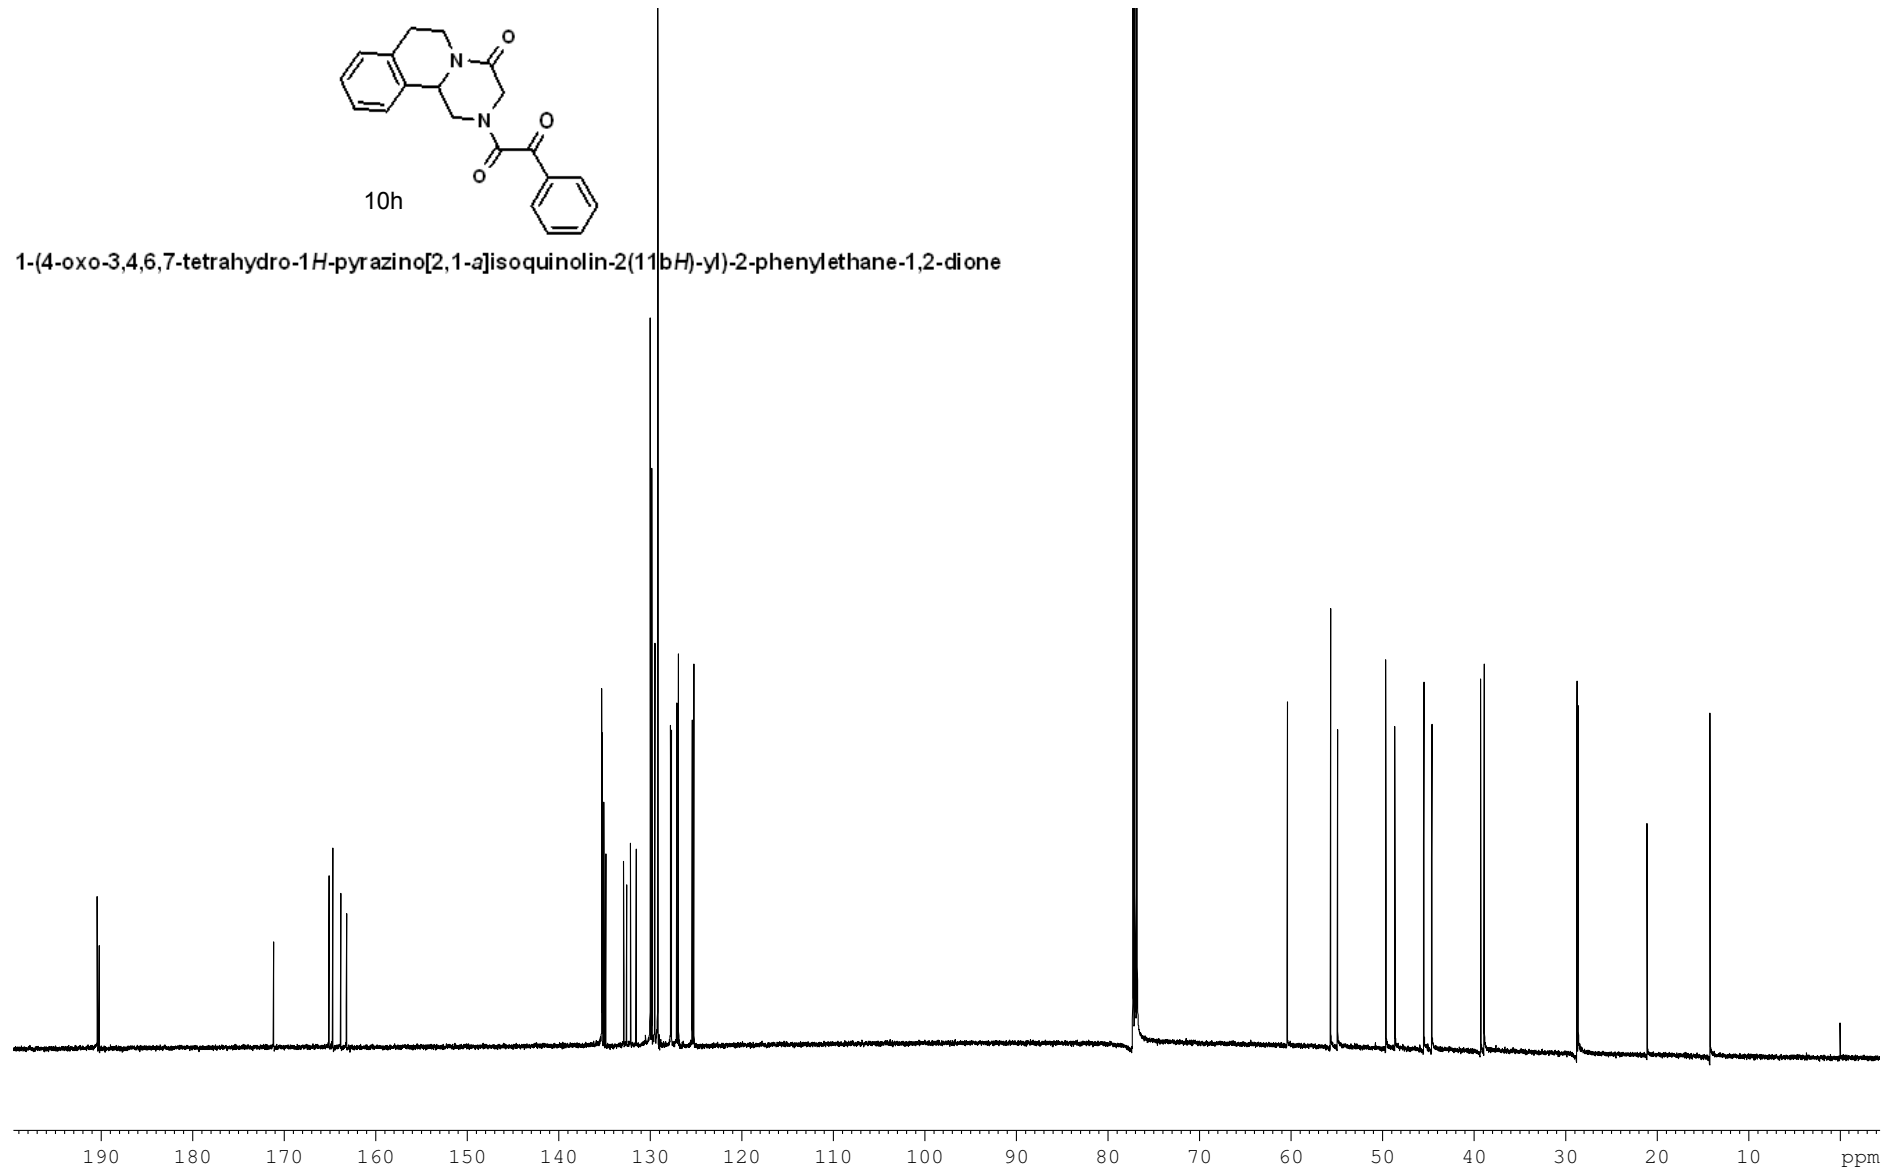

LHX-142, CDCl<sub>3</sub>, 600 MHz

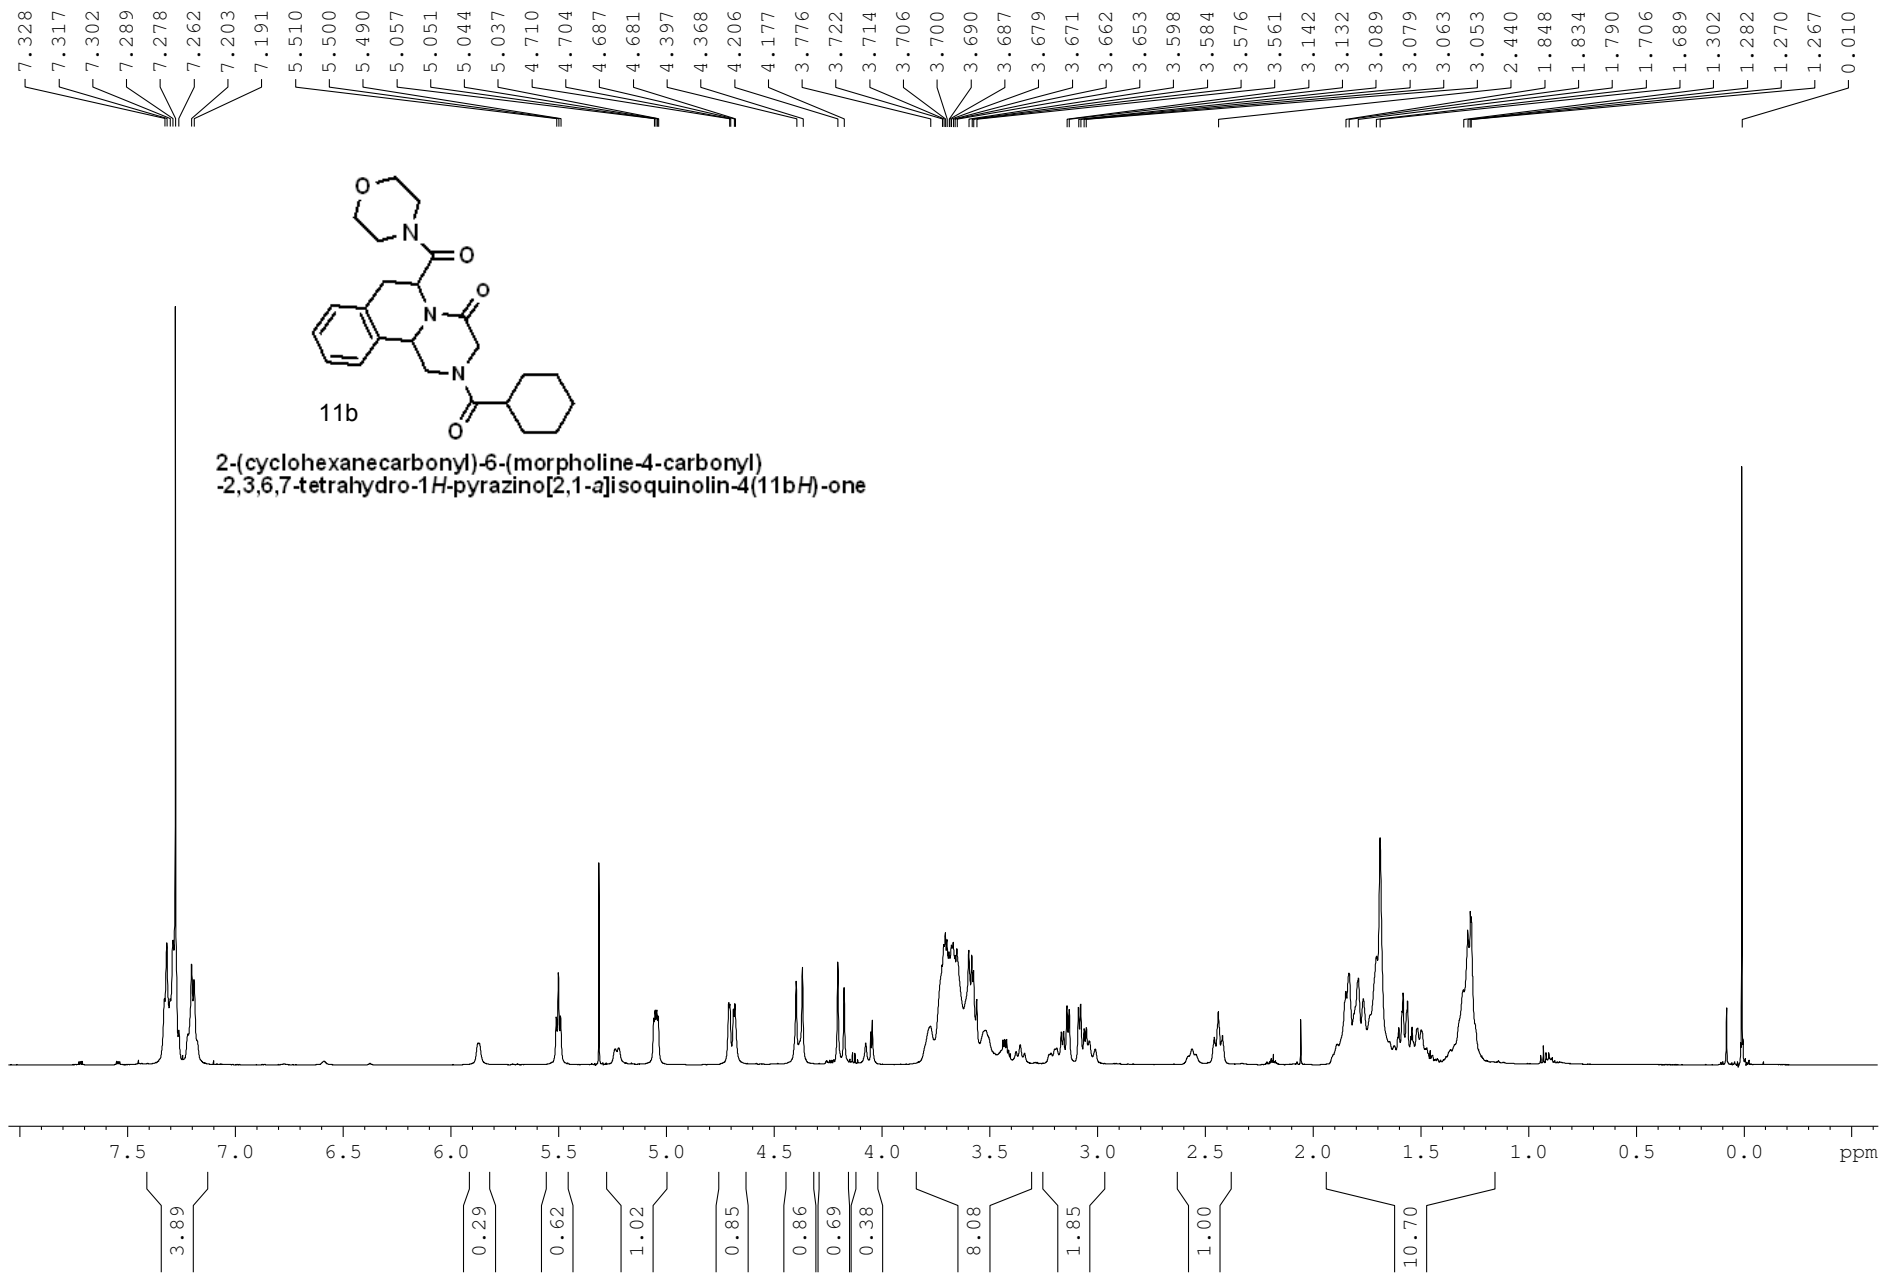

LHX-142, CDCl<sub>3</sub>, 600 MHz

— 174.76  
— 169.20  
— 165.12

133.73  
132.13  
131.65  
129.16  
128.31  
127.88  
127.39  
124.80  
124.33

77.25  
77.04  
76.83  
66.89  
66.70  
54.55  
53.53  
53.45  
49.68  
48.98  
48.77  
46.89  
46.40  
45.25  
43.59  
42.57  
42.27  
40.81  
30.91  
29.60  
29.52  
29.07  
25.69

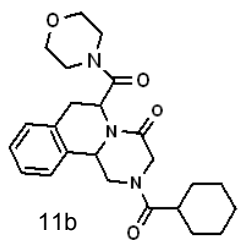

2-(cyclohexanecarbonyl)-6-(morpholine-4-carbonyl)-  
2,3,6,7-tetrahydro-1H-pyrazino[2,1-a]isoquinolin-4(11bH)-one

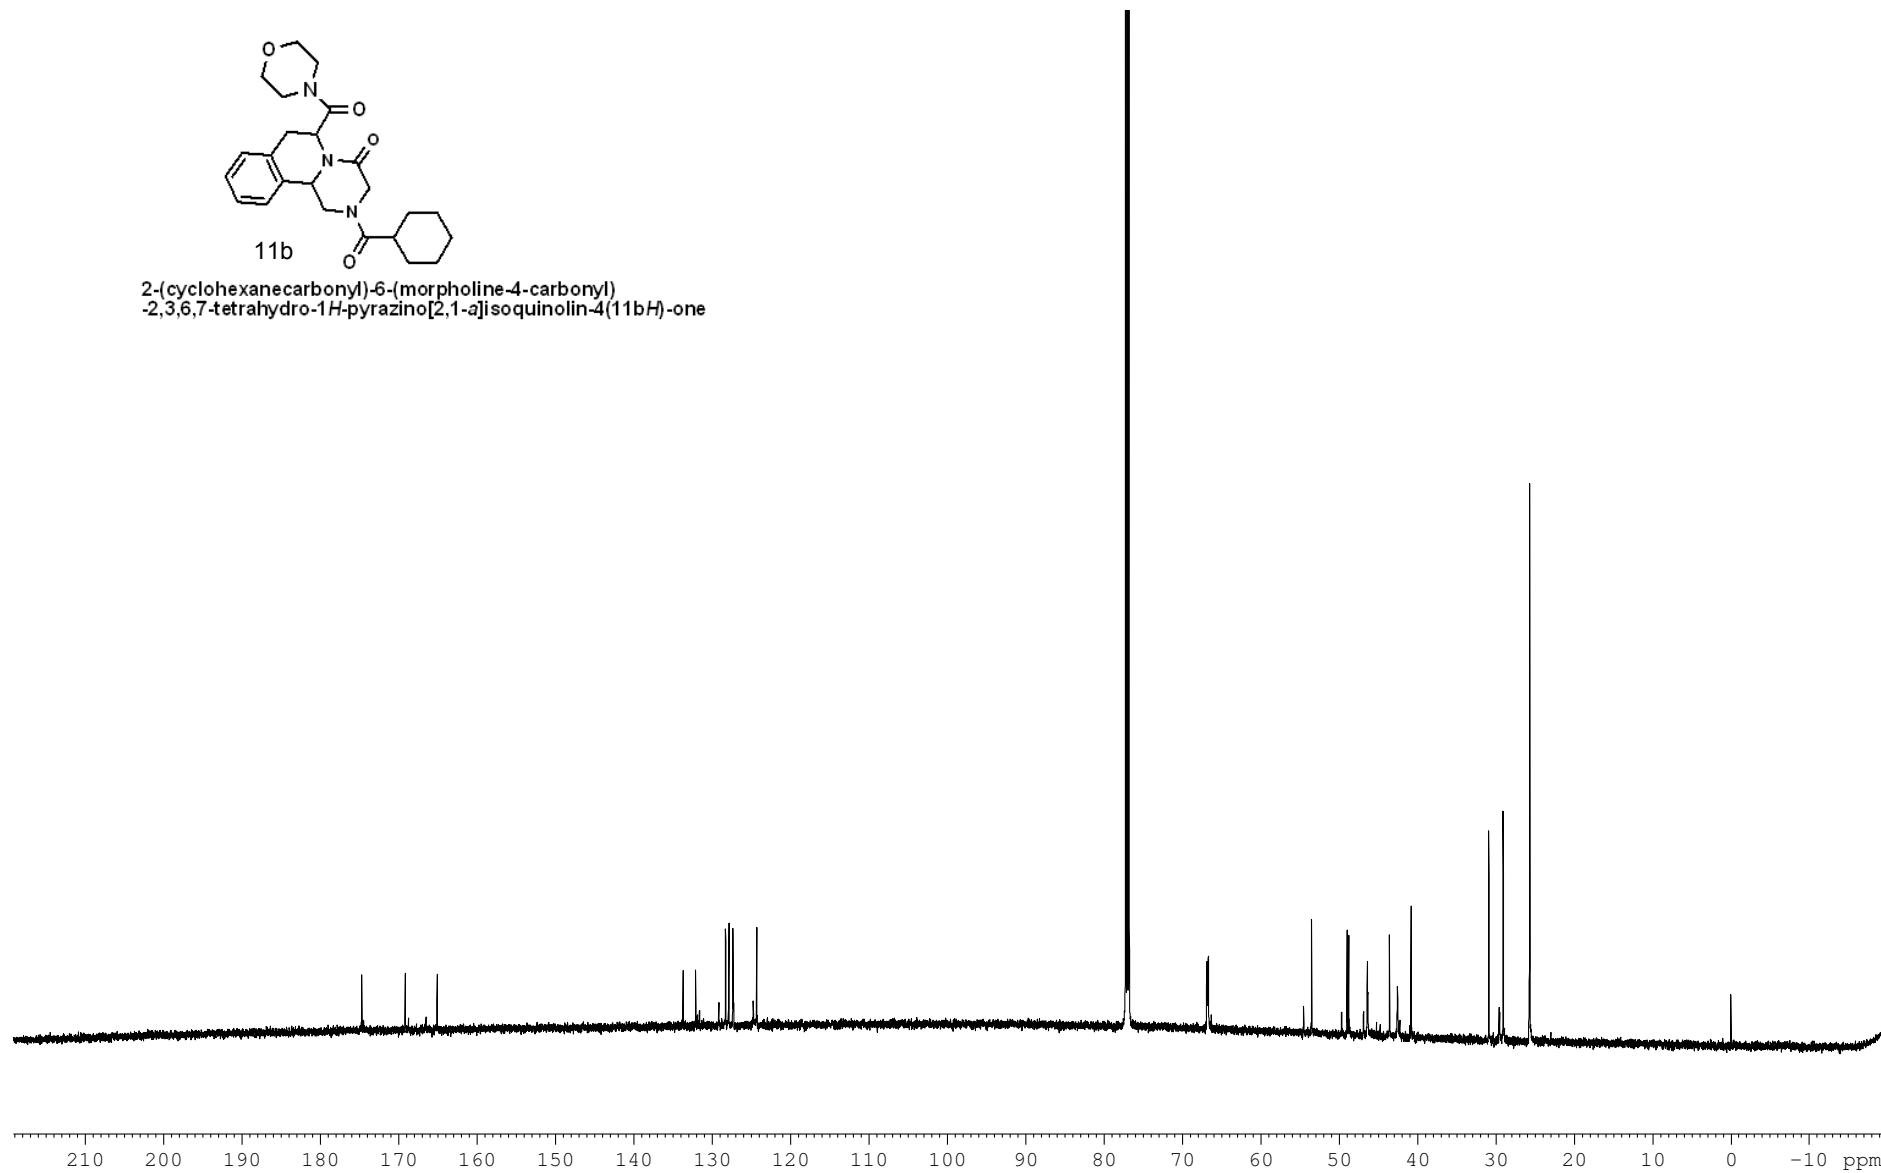

LHX-KK108, CDC13, NMR600

8.423  
8.420  
8.376  
8.369  
8.361  
7.657  
7.655  
7.643  
7.641  
7.268  
7.259  
7.209  
7.197  
6.911  
6.896  
5.035  
5.029  
5.018  
5.012  
4.840  
4.822  
3.234  
3.226  
3.223  
3.214  
3.004  
2.997  
2.978  
2.970  
2.924  
2.919  
2.903  
2.898  
2.878  
2.815  
2.810  
2.806  
2.788  
2.784  
2.780  
1.227  
1.222  
1.214  
1.209  
1.206  
1.202  
0.707  
0.698  
0.685  
0.676  
0.375  
0.367  
0.358  
0.349  
-0.000

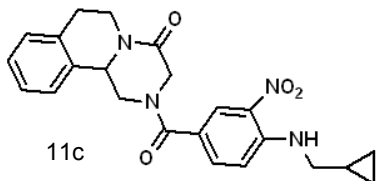

2-(4-(cyclopropylmethylamino)-3-nitrobenzoyl)-2,3,6,7-tetrahydro-1H-pyrazino[2,1-a]isoquinolin-4(11bH)-one

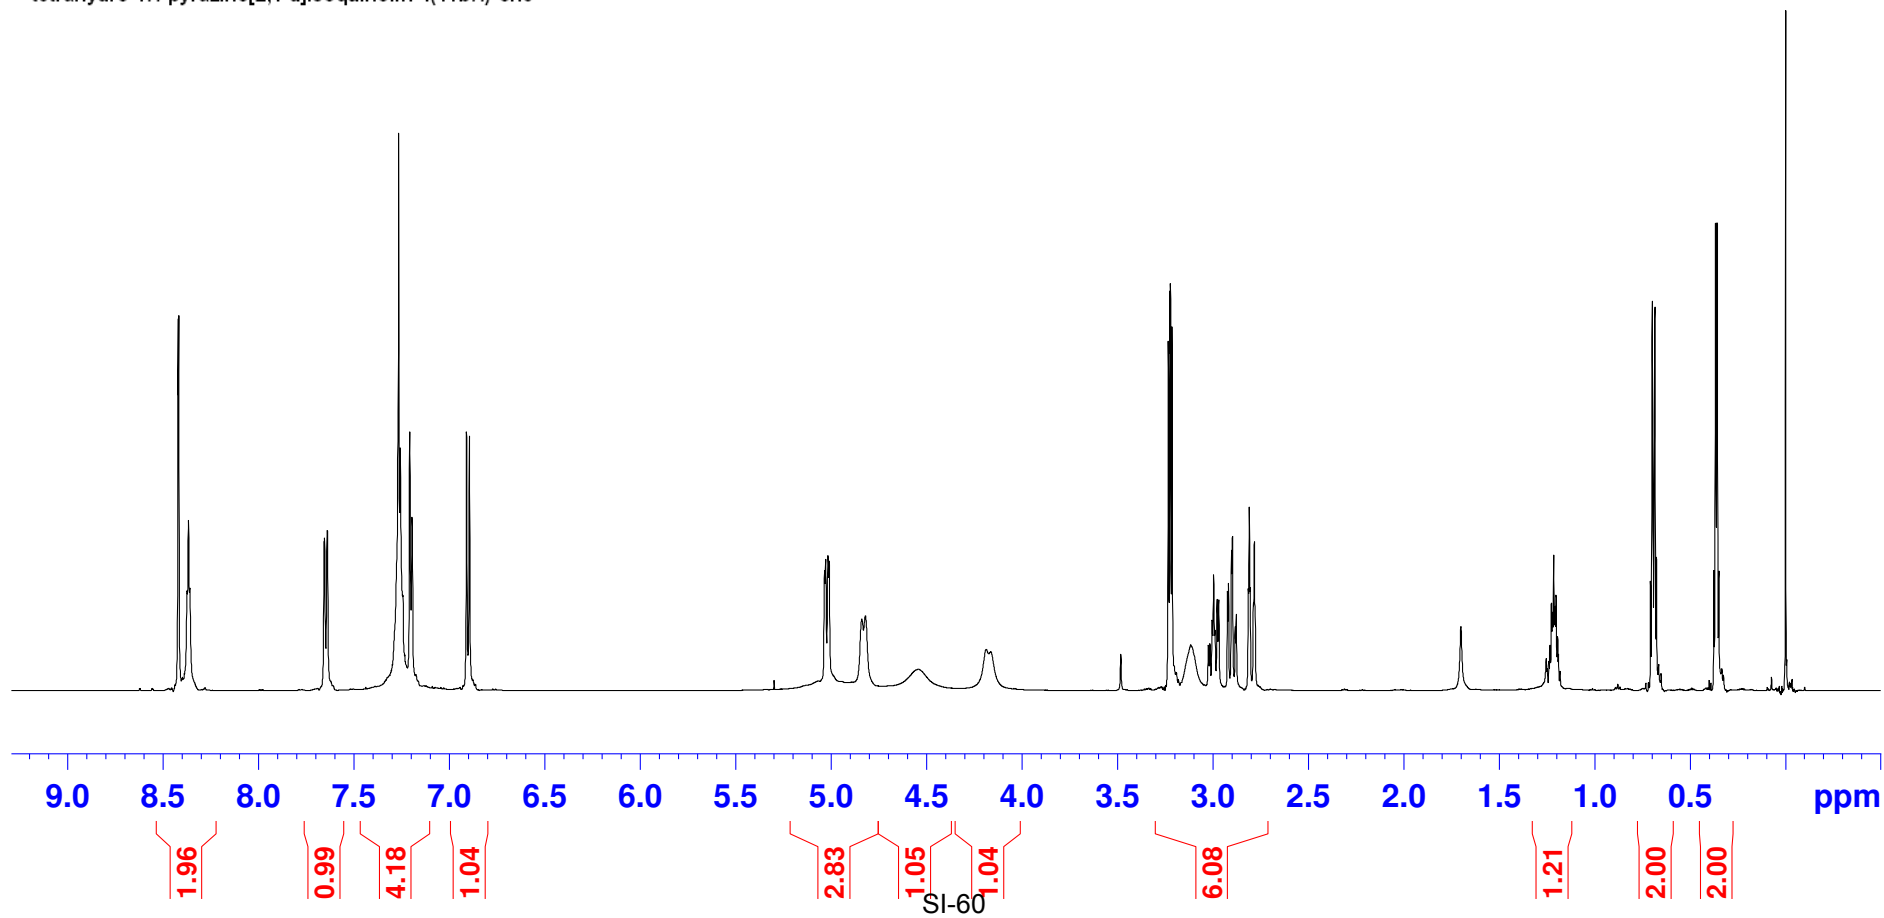

LHX-KK108, CDC13, NMR600

168.57  
164.21  
146.50  
135.69  
134.91  
132.45  
130.64  
129.45  
127.56  
127.35  
127.00  
125.44  
120.28  
114.24

77.25  
77.04  
76.83

54.76

48.21

38.99

28.75

10.24

-0.00

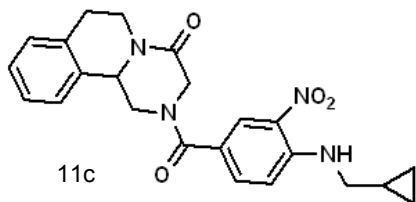

11c

2-(4-(cyclopropylmethylamino)-3-nitrobenzoyl)-2,3,6,7-tetrahydro-1H-pyrazino[2,1-a]isoquinolin-4(11bH)-one

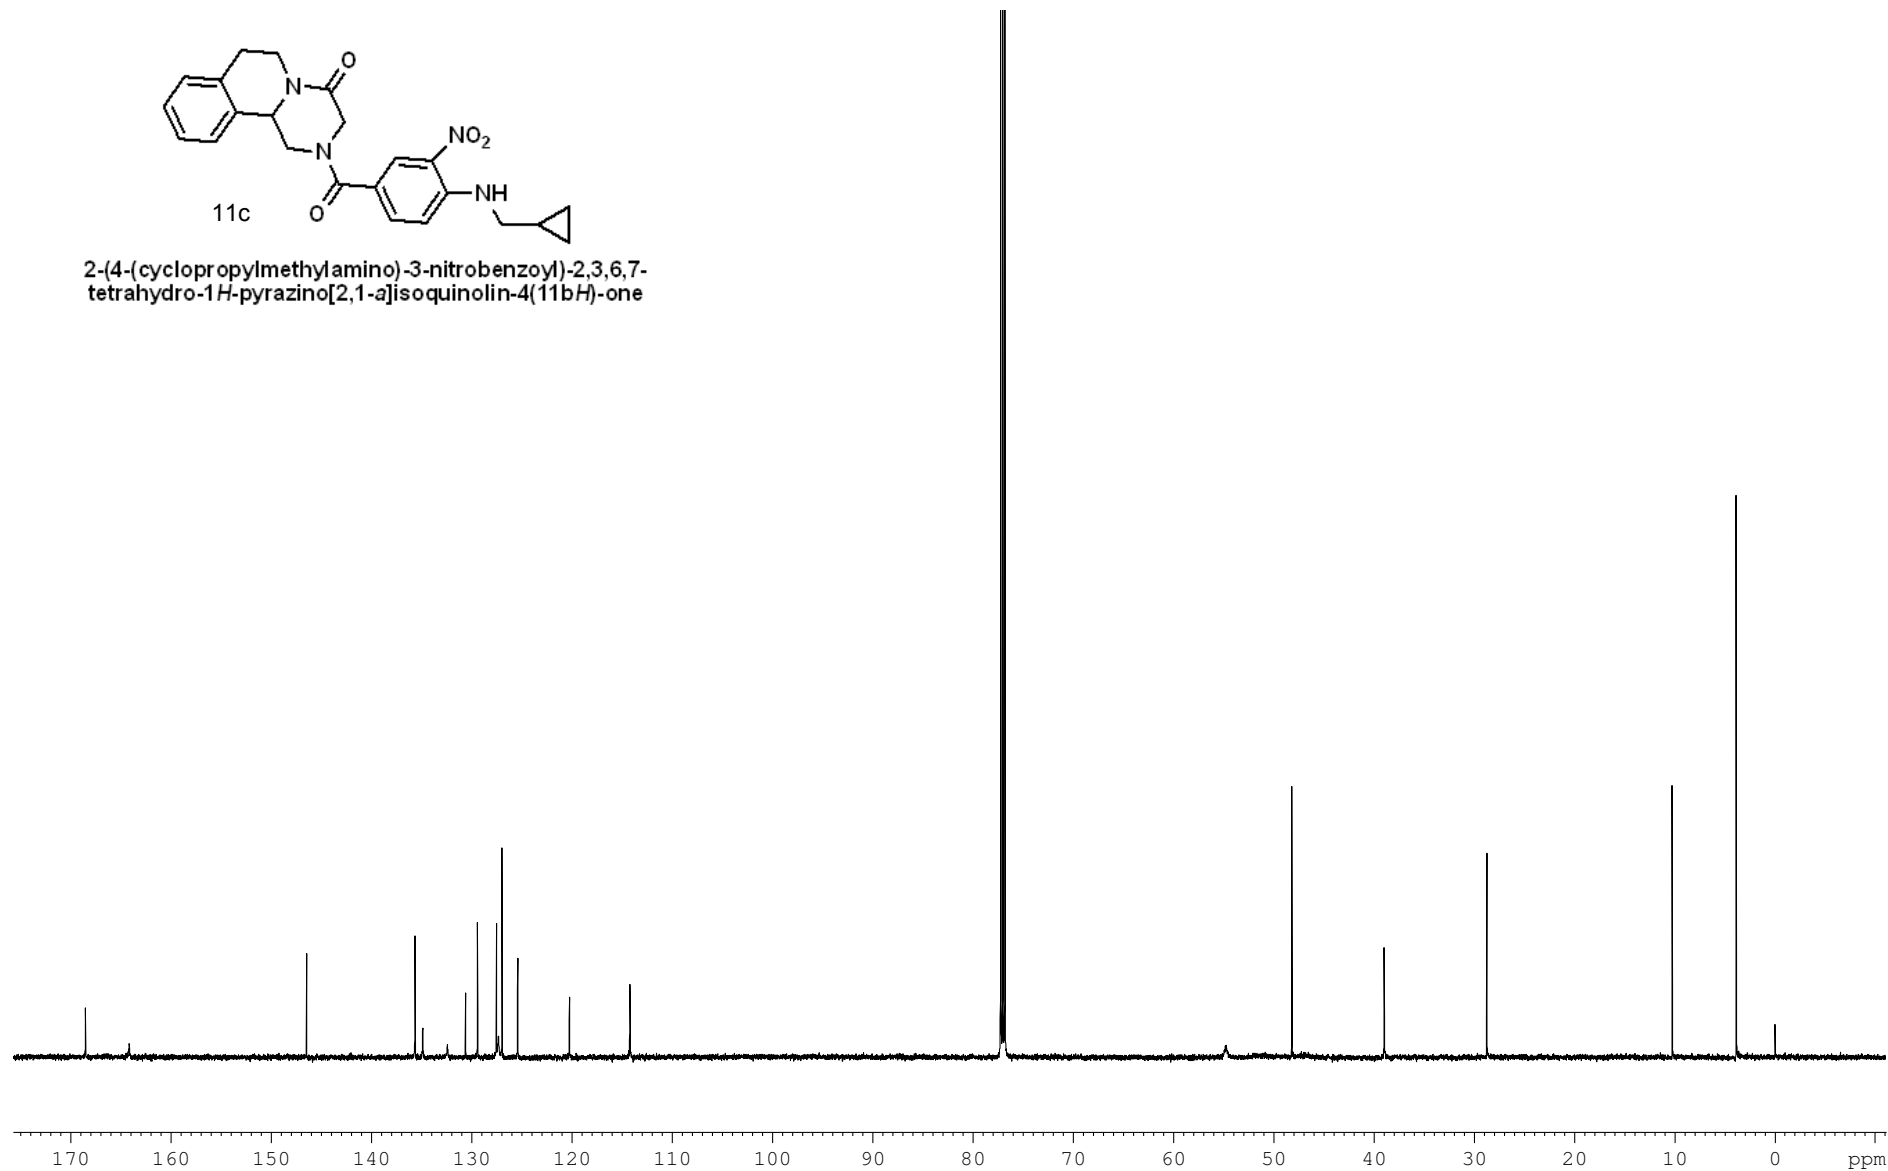

SI-61

LHX-KK106, CDC13, NMR600

8.616  
8.608  
8.601  
8.420  
8.416  
7.662  
7.660  
7.647  
7.645  
7.271  
7.260  
7.245  
7.209  
7.197  
6.965  
6.950  
5.037  
5.032  
5.020  
5.014  
4.839  
4.821  
3.578  
3.568  
3.559  
3.513  
3.503  
3.494  
3.482  
3.405  
3.118  
3.025  
3.017  
3.005  
2.997  
2.991  
2.979  
2.971  
2.926  
2.921  
2.906  
2.901  
2.886  
2.880  
2.815  
2.811  
2.807  
2.789  
2.785  
2.042  
2.031  
2.022  
2.012  
2.002  
1.749

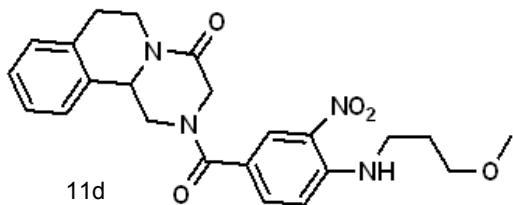

11d

2-(4-(3-methoxypropylamino)-3-nitrobenzoyl)-2,3,6,7-tetrahydro-1H-pyrazino[2,1-a]isoquinolin-4(11bH)-one

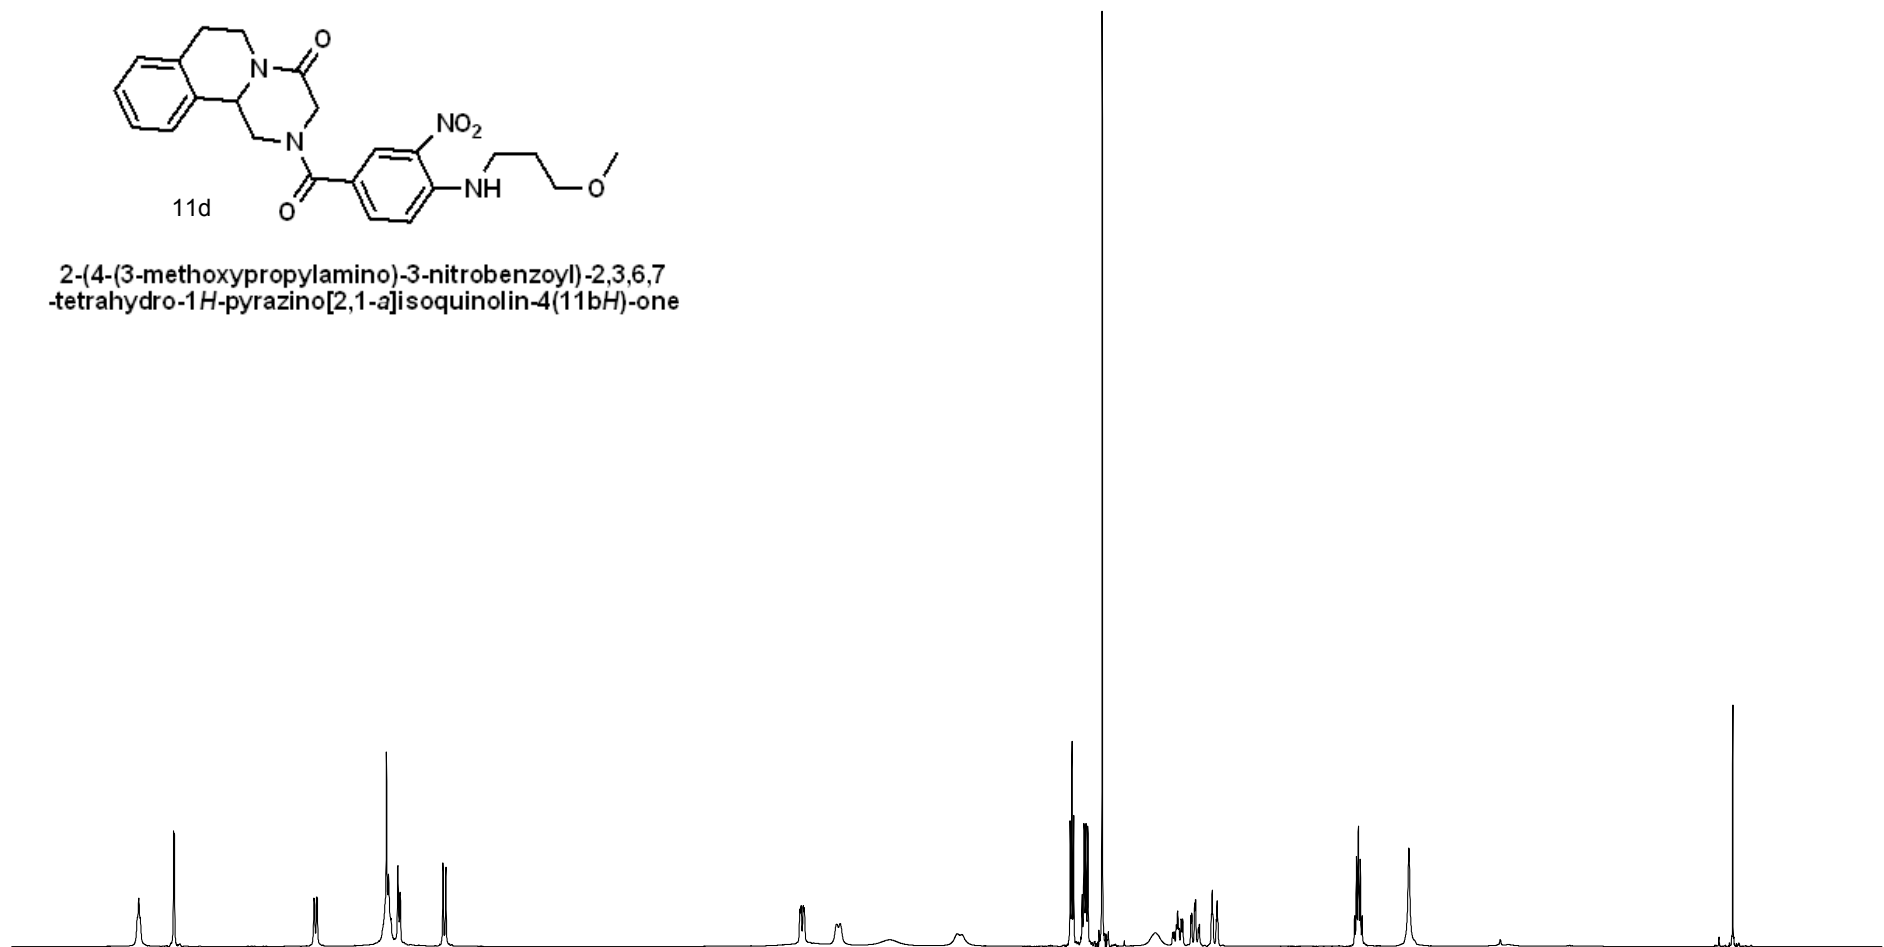

9 8 7 6 5 4 3 2 1 0 ppm

1.00  
0.95

0.97  
4.19  
1.02

3.01  
1.00  
SI-62  
1.01

1.91  
2.23  
2.87  
4.07

2.04  
1.87

LHX-KK106, CDCl<sub>3</sub>, NMR600

168.65  
164.27  
146.73  
135.67  
134.91  
132.44  
130.73  
129.45  
127.56  
127.40  
127.01  
125.45  
120.11  
114.08

70.44  
58.88  
54.84  
50.85  
41.23  
39.00  
28.74

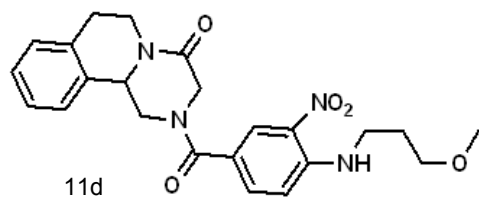

2-(4-(3-methoxypropylamino)-3-nitrobenzoyl)-2,3,6,7-tetrahydro-1H-pyrazino[2,1-a]isoquinolin-4(11bH)-one

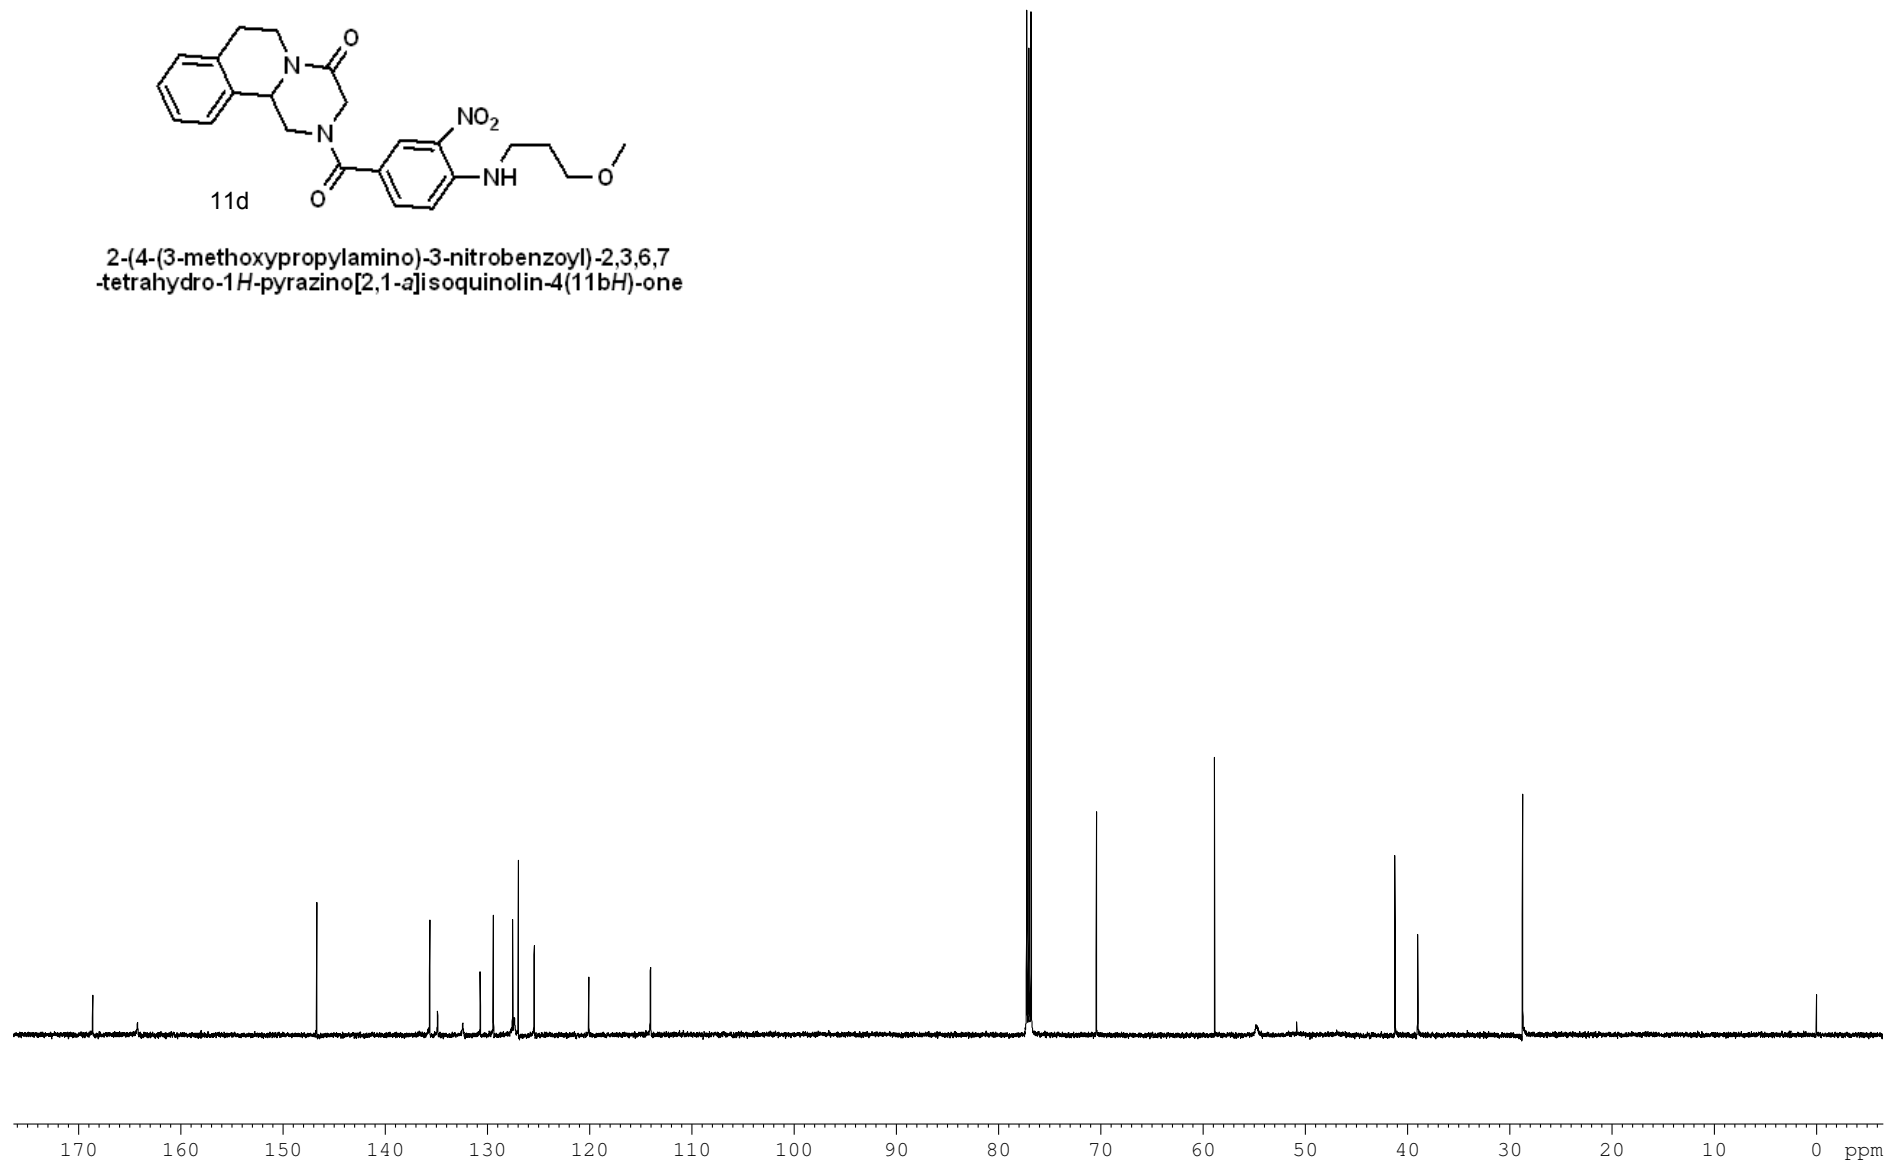

LHX-KK105, CDCl<sub>3</sub>, NMR600

8.021  
8.018  
7.657  
7.644  
7.282  
7.270  
7.263  
7.216  
7.204  
7.162  
7.148

5.015  
5.009  
4.998  
4.991  
4.830  
4.815  
4.168  
4.161  
4.149  
3.882  
3.874  
3.866  
3.182  
3.168  
3.162  
3.157  
3.137  
3.130  
3.120  
3.026  
3.018  
3.007  
2.999  
2.992  
2.980  
2.973  
2.932

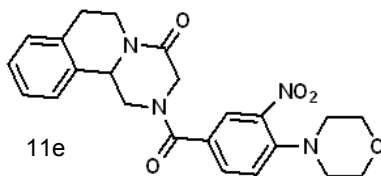

2-(4-morpholino-3-nitrobenzoyl)-2,3,6,7-tetrahydro-1H-pyrazino[2,1-a]isoquinolin-4(11bH)-one

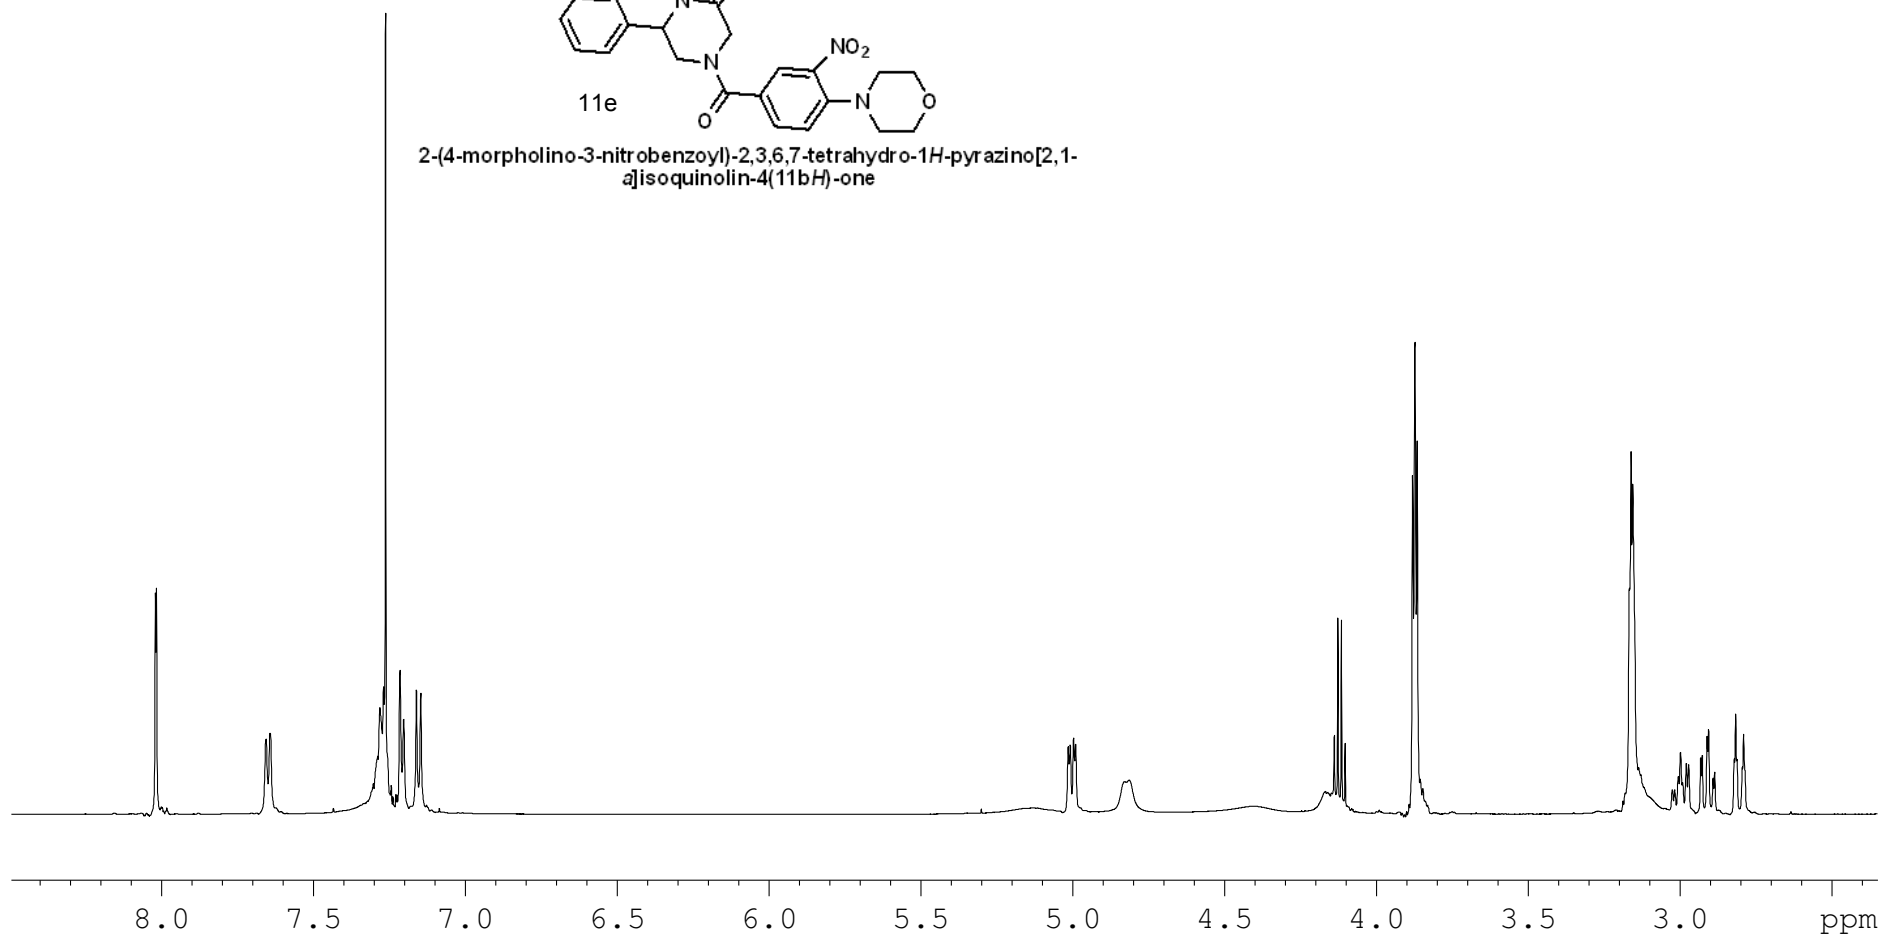

0.93

0.96

0.95

0.17

0.02

0.76

0.94

0.69

0.10

0.16

0.00



LHX-KK105, CDCl<sub>3</sub>, NMR600

171.18  
167.93  
163.88  
  
147.41  
141.06  
  
134.91  
133.09  
129.50  
127.66  
127.05  
125.40  
120.17

77.23  
77.02  
76.81  
  
66.51  
60.41  
  
51.36  
  
39.06  
  
28.72  
21.07  
14.20  
  
-0.00

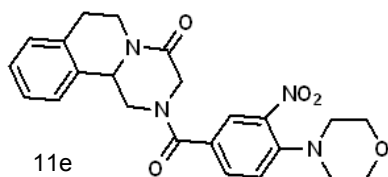

11e

2-(4-morpholino-3-nitrobenzoyl)-2,3,6,7-tetrahydro-1H-pyrazino[2,1-a]isoquinolin-4(11bH)-one

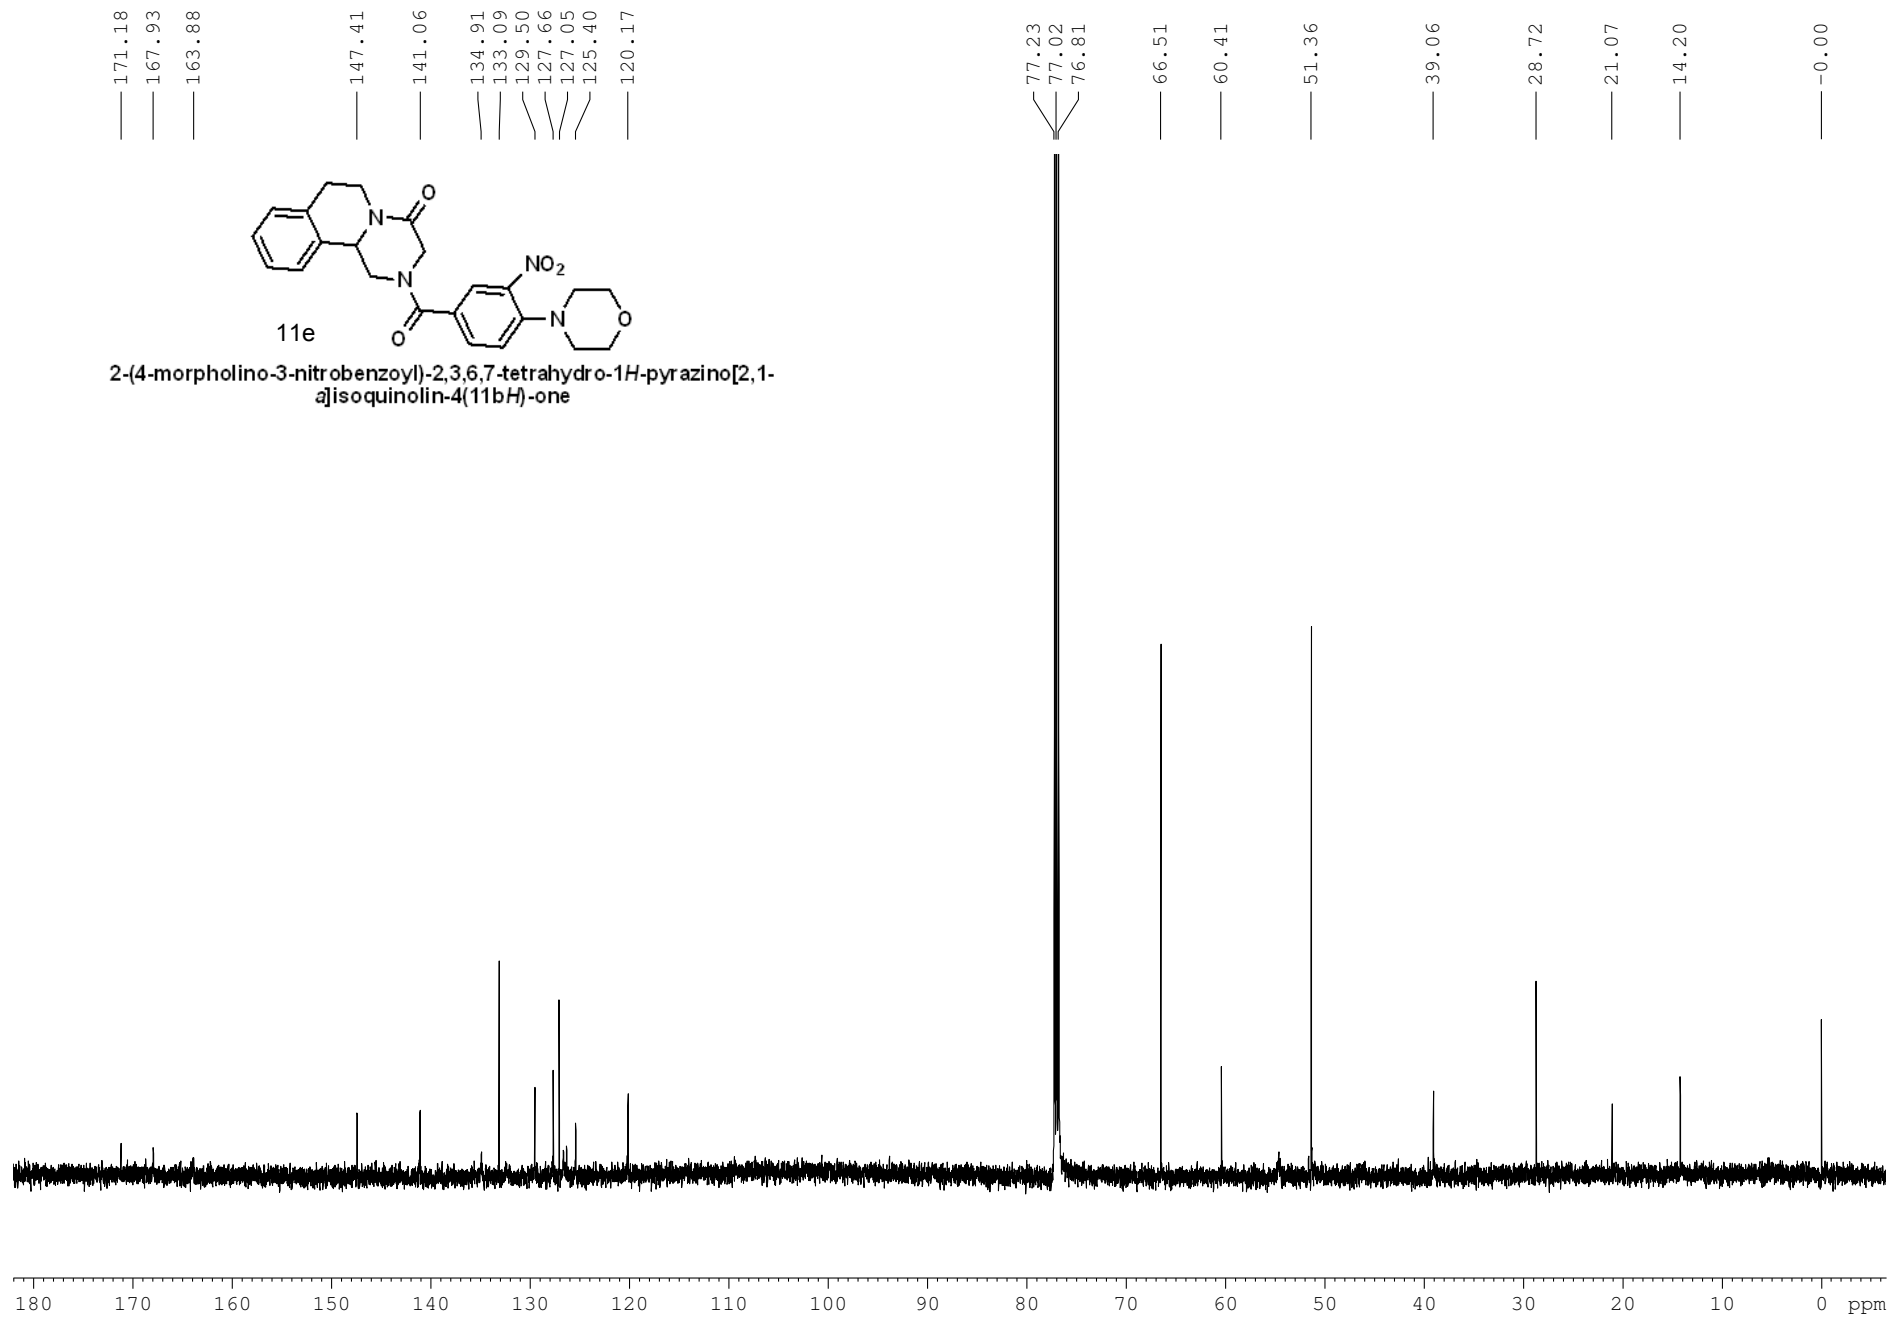

SI-65

LHX-KK107, CDC13, NMR600

8.812  
8.426  
8.423  
7.668  
7.654  
7.290  
7.271  
7.261  
7.248  
7.211  
7.199  
6.906  
6.891  
5.039  
5.033  
5.021  
5.016  
4.839  
4.820  
4.544  
4.189  
4.165  
3.786  
3.779  
3.771  
3.439  
3.430  
3.421  
3.412  
3.118  
3.025  
3.017  
3.005  
2.998  
2.991  
2.979  
2.971  
2.926  
2.921  
2.905  
2.900  
2.885  
2.880  
2.812  
2.786  
2.772  
2.761  
2.751  
2.553

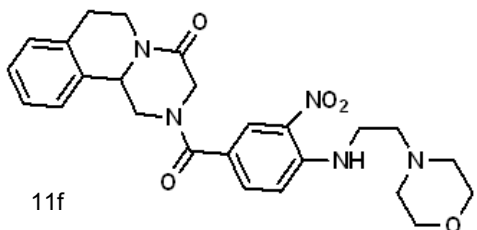

11f

2-(4-(2-morpholinoethylamino)-3-nitrobenzoyl)-  
2,3,6,7-tetrahydro-1H-pyrazino[2,1-a]isoquinolin-4(11bH)-one

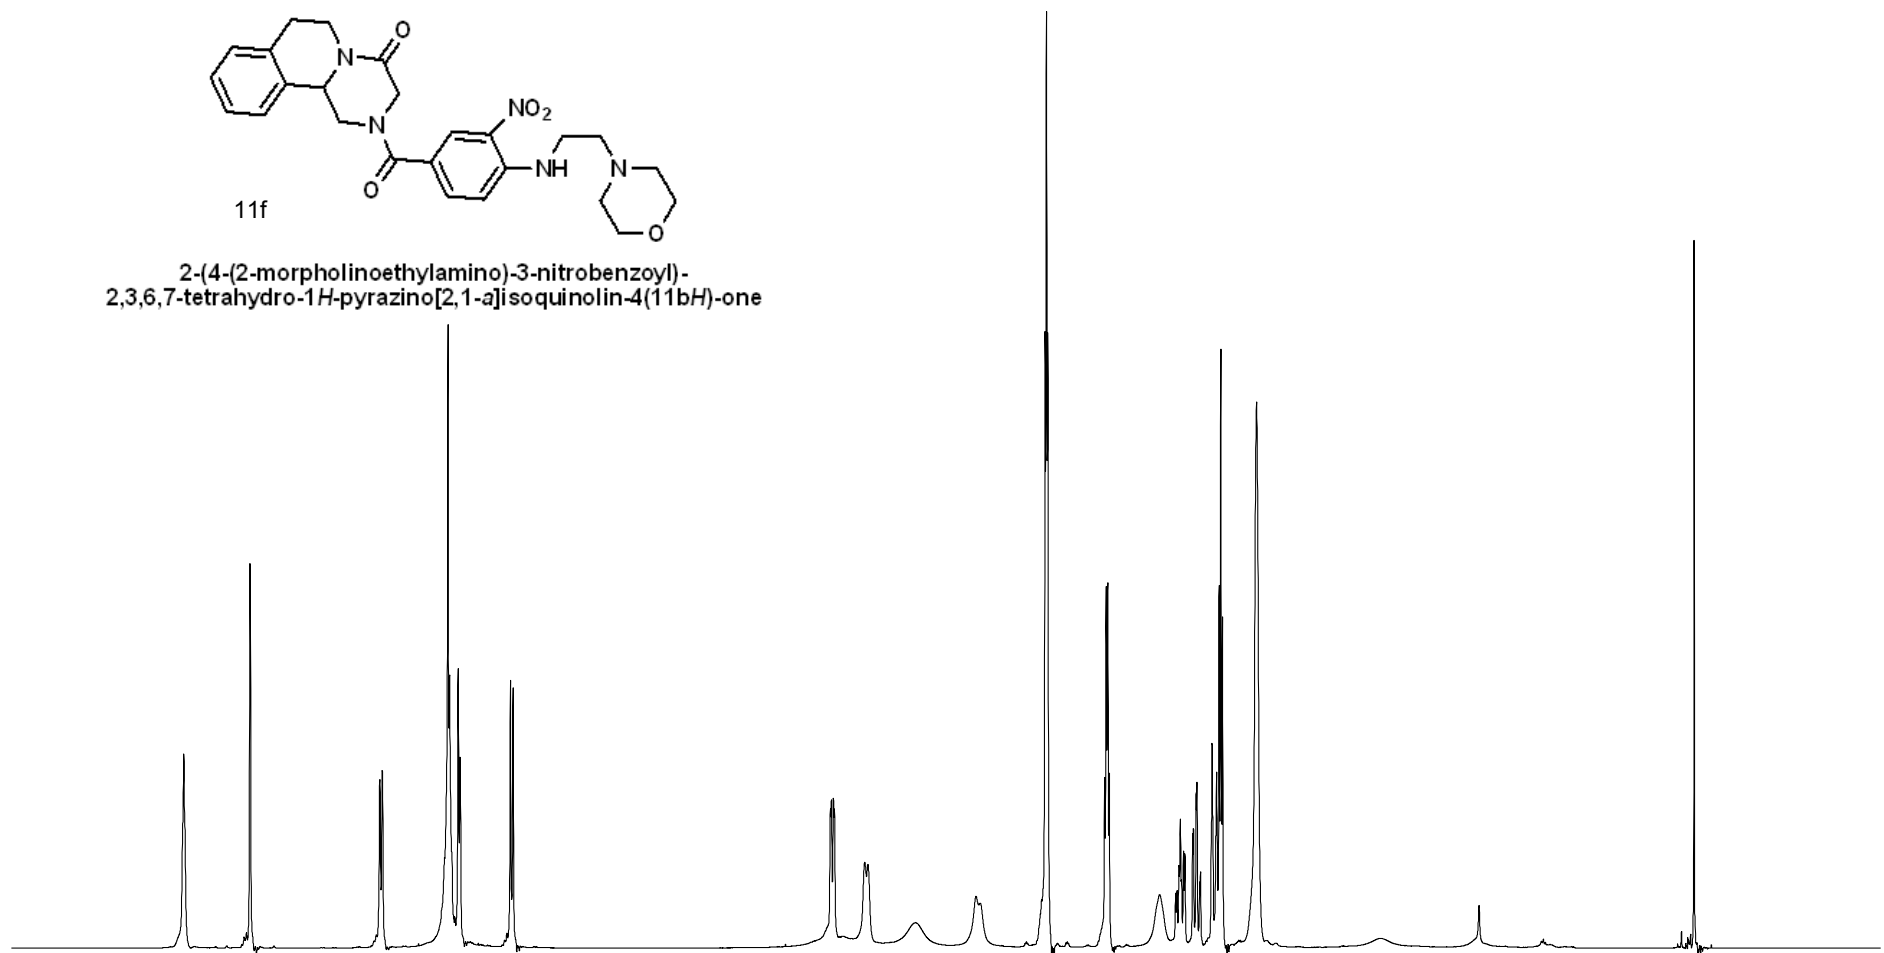

9 8 7 6 5 4 3 2 1 0 ppm

1.00 0.96 0.99 4.14 1.03 2.92 0.98 1.02 4.06 2.08 0.98 5.18 4.01

SI-66

LHX-KK107, CDCl<sub>3</sub>, NMR600

— 168.59  
— 164.22  
— 146.36  
— 135.68  
— 134.91  
— 132.44  
— 130.88  
— 129.45  
— 127.56  
— 127.39  
— 127.00  
— 125.43  
— 120.24  
— 114.41

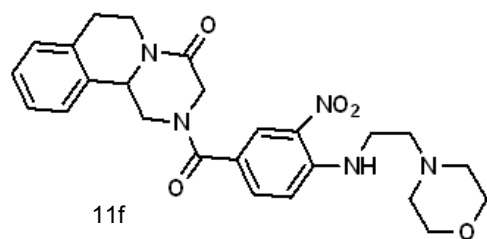

2-(4-(2-morpholinoethylamino)-3-nitrobenzoyl)-  
2,3,6,7-tetrahydro-1H-pyrazino[2,1-a]isoquinolin-4(11bH)-one

— 66.99  
— 55.71  
— 54.76  
— 53.10  
— 39.38  
— 38.99  
— 28.74

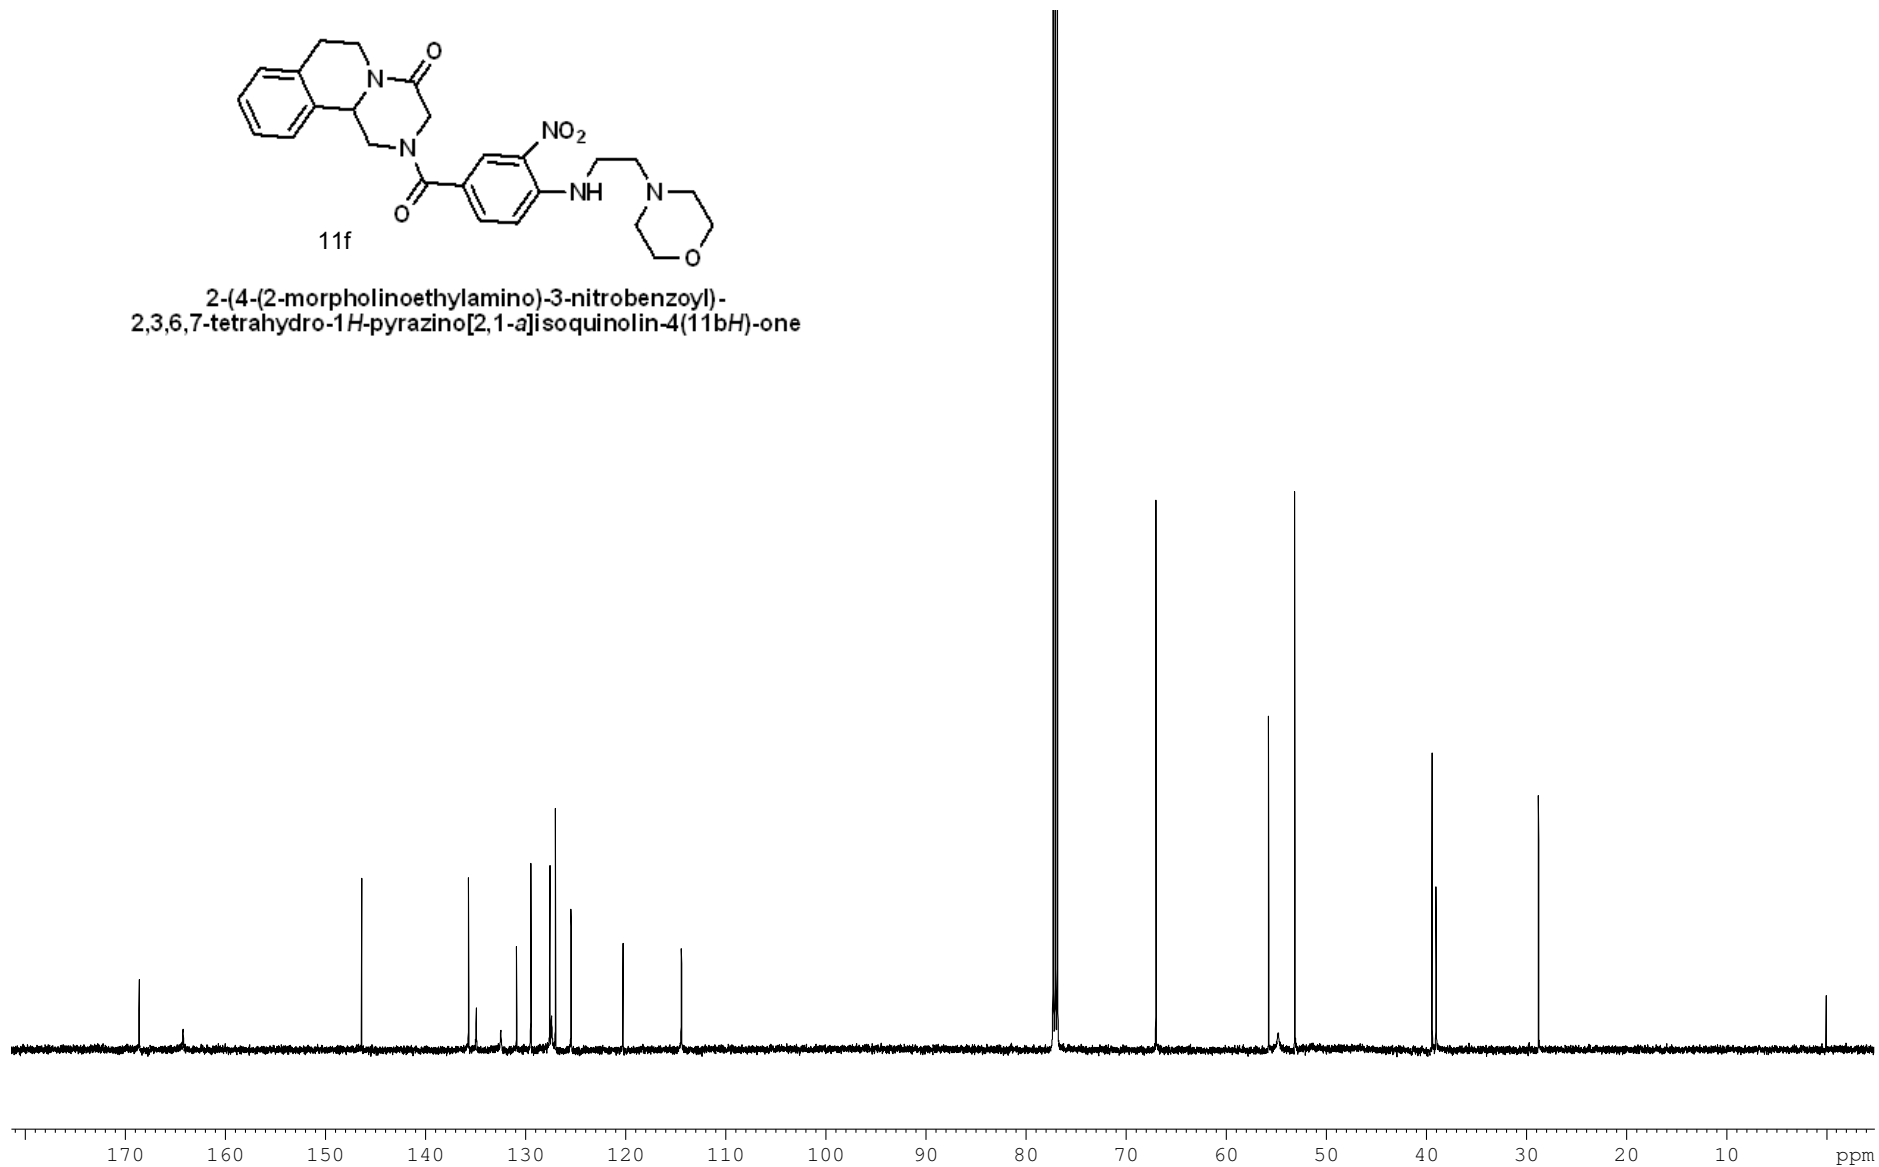

LHX-153, CDCl<sub>3</sub>, 600 MHz

8.533  
8.519  
8.326  
8.324  
8.268  
8.267  
8.261  
8.256  
8.255  
8.247  
8.191  
7.583  
7.569  
7.539  
7.526  
7.520  
7.512  
7.508  
7.506  
7.494  
7.278  
7.269  
7.220  
7.209  
7.174  
7.161  
6.782  
5.724  
5.714  
5.704  
5.053  
5.047  
5.036  
5.029  
3.466  
3.456  
3.446  
3.437  
3.265  
3.255  
3.245  
3.235  
3.015  
2.996  
2.989  
2.951  
2.946  
2.930  
2.926  
2.878  
2.831  
2.826  
2.823  
2.805  
2.800

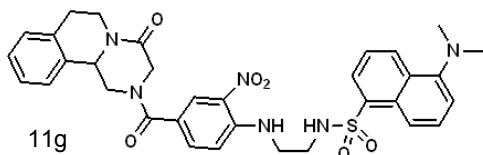

11g

5-(dimethylamino)-N-(2-(2-nitro-4-(4-oxo-2,3,4,6,7,11b-hexahydro-1H-pyrazino[2,1-a]isoquinoline-2-carbonyl)phenylamino)ethyl)naphthalene-1-sulfonamide

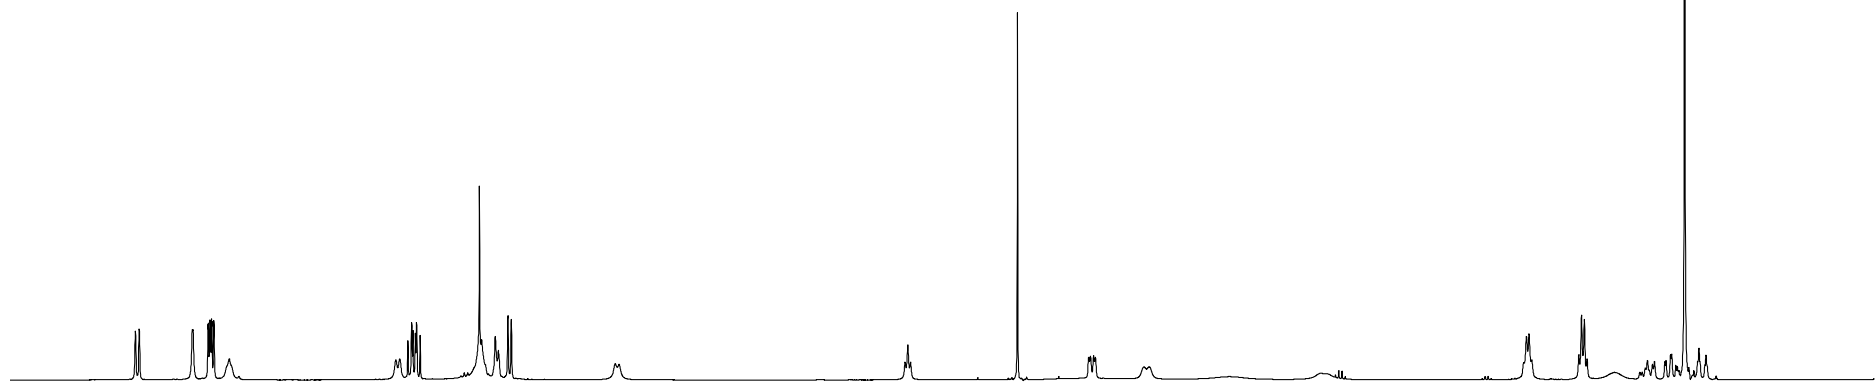

8.5

8.0

7.5

7.0

6.5

6.0

5.5

5.0

4.5

4.0

3.5

3.0

ppm

1.03

0.98

2.05

1.10

1.05

2.08

3.28

1.28

1.18

0.98

1.09

SI-68

3.27

1.33

1.24

2.00

2.09

10.63

LHX-153, CDCl<sub>3</sub>, NMR600

168.32  
164.29  
152.09  
146.01  
143.21  
135.63  
134.90  
134.28  
132.44  
131.09  
130.86  
129.87  
129.64  
129.45  
129.40  
128.71  
127.59  
127.37  
127.05  
125.48  
123.13  
120.98  
119.37  
118.34  
115.35  
113.79

77.24  
77.03  
76.82

45.40  
42.69  
41.80  
39.05

28.76

0.01

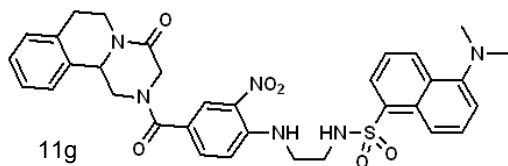

11g

5-(dimethylamino)-N-(2-(2-nitro-4-(4-oxo-2,3,4,6,7,11b-hexahydro-1H-pyrazino[2,1-a]isoquinoline-2-carbonyl)phenylamino)ethyl)naphthalene-1-sulfonamide

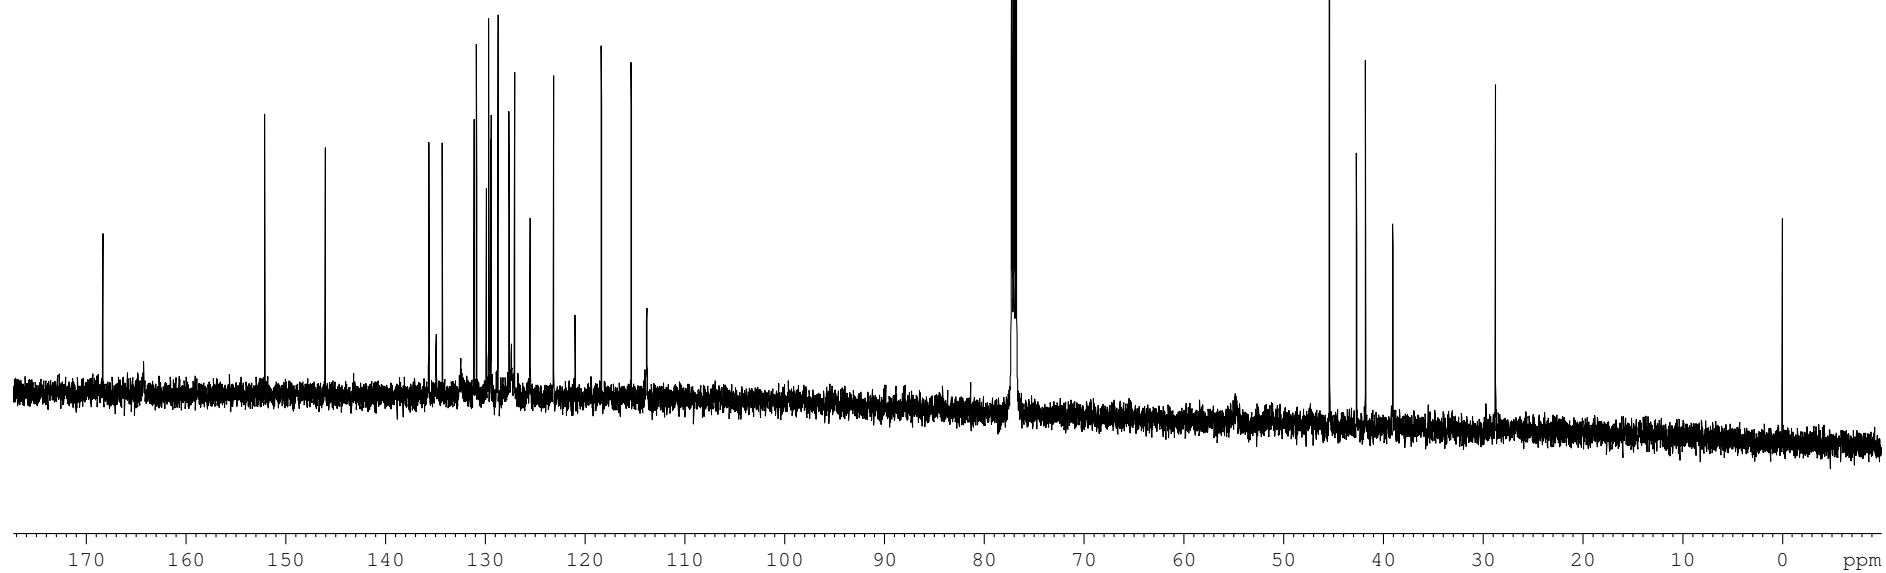

Supplement: NIHMS343095-supplement-Supp_Material.pdf [file NIHMS343095-supplement-Supp_Material.pdf]
